# Supplementary material for: Design, Synthesis, In Vitro, and In Silico Insights of 5-(Substituted benzylidene)-2-phenylthiazol-4(5H)-one Derivatives: A Novel Class of Anti-Melanogenic Compounds
Source: MDPI journal article supplement (doi:10.3390/molecules28083293), 2023-04-07
Supplement: s1 [file s1]

## Supplementary Materials

for

### Design, Synthesis, In Vitro, and In Silico Insights of 5-(Substituted benzylidene)-2-phenylthiazol-4(5*H*)-one Derivatives: A Novel Class of Anti-Melanogenic Compounds

Dahye Yoon <sup>1,†</sup>, Min Kyung Kang <sup>1,†</sup>, Hee Jin Jung <sup>2,†</sup>, Sultan Ullah <sup>3</sup>, Jieun Lee <sup>1</sup>, Yeongmu Jeong <sup>1</sup>, Sang Gyun Noh <sup>2</sup>, Dongwan Kang <sup>4</sup>, Yujin Park <sup>4</sup>, Pusoon Chun <sup>5</sup>, Hae Young Chung <sup>2</sup> and Hyung Ryong Moon <sup>1,\*</sup>

<sup>1</sup> Department of Manufacturing Pharmacy, College of Pharmacy, Pusan National University, Busan 46241, Republic of Korea; dahae0528@pusan.ac.kr (D.Y.); kmk87106@pusan.ac.kr (M.K.K.); yjiun@pusan.ac.kr (J.L.); dassabn@pusan.ac.kr (Y.J.)

<sup>2</sup> Department of Pharmacy, College of Pharmacy, Pusan National University, Busan 46241, Republic of Korea; hjjung2046@pusan.ac.kr (H.J.J.); rskrsk92@pusan.ac.kr (S.G.N.); hyjung@pusan.ac.kr (H.Y.C.)

<sup>3</sup> Department of Molecular Medicine, The Herbert Wertheim UF Scripps Institute for Biomedical Innovation & Technology, Jupiter, FL 33458, USA; sultanullahf@ufl.edu

<sup>4</sup> Department of Medicinal Chemistry, New Drug Development Center, Daegu-Gyeongbuk Medical Innovation Foundation, Daegu 41061, Republic of Korea; kdw4106@kmedihub.re.kr (D.K.); pyj1016@kmedihub.re.kr (Y.P.)

<sup>5</sup> College of Pharmacy and Inje Institute of Pharmaceutical Sciences and Research, Inje University, Gimhae 50834, Republic of Korea; pusoon@inje.ac.kr

\* Correspondence: mhr108@pusan.ac.kr; Tel.: +82 51 510 2815; Fax: +82 51 513 6754

† These authors contributed equally to this work.

## Contents

|                                                                                         |    |
|-----------------------------------------------------------------------------------------|----|
| Figure S1. $^1\text{H}$ NMR spectrum of compound <b>1</b> .....                         | 4  |
| Figure S2. $^{13}\text{C}$ NMR spectrum of compound <b>1</b> .....                      | 5  |
| Figure S3. LRMS spectrum of compound <b>1</b> .....                                     | 6  |
| Figure S4. $^1\text{H}$ NMR spectrum of compound <b>2</b> .....                         | 7  |
| Figure S5. $^{13}\text{C}$ NMR spectrum of compound <b>2</b> .....                      | 8  |
| Figure S6. Proton-coupled $^{13}\text{C}$ NMR spectrum of compound <b>2</b> .....       | 9  |
| Figure S7. LRMS spectrum of compound <b>2</b> .....                                     | 10 |
| Figure S8. $^1\text{H}$ NMR spectrum of compound <b>3</b> .....                         | 11 |
| Figure S9. $^{13}\text{C}$ NMR spectrum of compound <b>3</b> .....                      | 12 |
| Figure S10. LRMS spectrum of compound <b>3</b> .....                                    | 13 |
| Figure S11. $^1\text{H}$ NMR spectrum of compound <b>4</b> .....                        | 14 |
| Figure S12. $^{13}\text{C}$ NMR spectrum of compound <b>4</b> .....                     | 15 |
| Figure S13. LRMS spectrum of compound <b>4</b> .....                                    | 16 |
| Figure S14. $^1\text{H}$ NMR spectrum of compound <b>5</b> .....                        | 17 |
| Figure S15. $^{13}\text{C}$ NMR spectrum of compound <b>5</b> .....                     | 18 |
| Figure S16. LRMS spectrum of compound <b>5</b> .....                                    | 19 |
| Figure S17. $^1\text{H}$ NMR spectrum of compound <b>6</b> .....                        | 20 |
| Figure S18. $^{13}\text{C}$ NMR spectrum of compound <b>6</b> .....                     | 21 |
| Figure S19. LRMS spectrum of compound <b>6</b> .....                                    | 22 |
| Figure S20. $^1\text{H}$ NMR spectrum of compound <b>7</b> .....                        | 23 |
| Figure S21. $^{13}\text{C}$ NMR spectrum of compound <b>7</b> .....                     | 24 |
| Figure S22. LRMS spectrum of compound <b>7</b> .....                                    | 25 |
| Figure S23. $^1\text{H}$ NMR spectrum of compound <b>8</b> (in $\text{DMSO}-d_6$ )..... | 26 |

|                                                                                                                     |    |
|---------------------------------------------------------------------------------------------------------------------|----|
| Figure S24. $^{13}\text{C}$ NMR spectrum of compound <b>8</b> (in $\text{DMSO-}d_6$ ).....                          | 27 |
| Figure S25. LRMS spectrum of compound <b>8</b> .....                                                                | 28 |
| Figure S26. $^1\text{H}$ NMR spectrum of compound <b>9</b> .....                                                    | 29 |
| Figure S27. $^{13}\text{C}$ NMR spectrum of compound <b>9</b> .....                                                 | 30 |
| Figure S28. LRMS spectrum of compound <b>9</b> .....                                                                | 31 |
| Figure S29. $^1\text{H}$ NMR spectrum of compound <b>10</b> .....                                                   | 32 |
| Figure S30. $^{13}\text{C}$ NMR spectrum of compound <b>10</b> .....                                                | 33 |
| Figure S31. LRMS spectrum of compound <b>10</b> .....                                                               | 34 |
| Figure S32. $^1\text{H}$ NMR spectrum of compound <b>11</b> .....                                                   | 35 |
| Figure S33. $^{13}\text{C}$ NMR spectrum of compound <b>11</b> .....                                                | 36 |
| Figure S34. LRMS spectrum of compound <b>11</b> .....                                                               | 37 |
| Figure S35. $^1\text{H}$ NMR spectrum of compound <b>12</b> .....                                                   | 38 |
| Figure S36. $^{13}\text{C}$ NMR spectrum of compound <b>12</b> .....                                                | 39 |
| Figure S37. LRMS spectrum of compound <b>12</b> .....                                                               | 40 |
| Figure S38. $^1\text{H}$ NMR spectrum of compound <b>13</b> .....                                                   | 41 |
| Figure S39. $^{13}\text{C}$ NMR spectrum of compound <b>13</b> .....                                                | 42 |
| Figure S40. LRMS spectrum of compound <b>13</b> .....                                                               | 43 |
| Figure S41. $^1\text{H}$ NMR spectrum of compound <b>14</b> .....                                                   | 44 |
| Figure S42. $^{13}\text{C}$ NMR spectrum of compound <b>14</b> .....                                                | 45 |
| Figure S43. LRMS spectrum of compound <b>14</b> .....                                                               | 46 |
| Figure S44. $^1\text{H}$ NMR spectrum of compound <b>8</b> (in $\text{CDCl}_3$ ) reported in other article.....     | 47 |
| Figure S45. $^{13}\text{C}$ NMR spectrum of compound <b>8</b> (in $\text{CDCl}_3$ ) reported in other article ..... | 48 |
| Figure S46. $^1\text{H}$ NMR spectrum of compound <b>8</b> in $\text{CDCl}_3$ .....                                 | 49 |
| Figure S47. $^{13}\text{C}$ NMR spectrum of compound <b>8</b> in $\text{CDCl}_3$ .....                              | 50 |

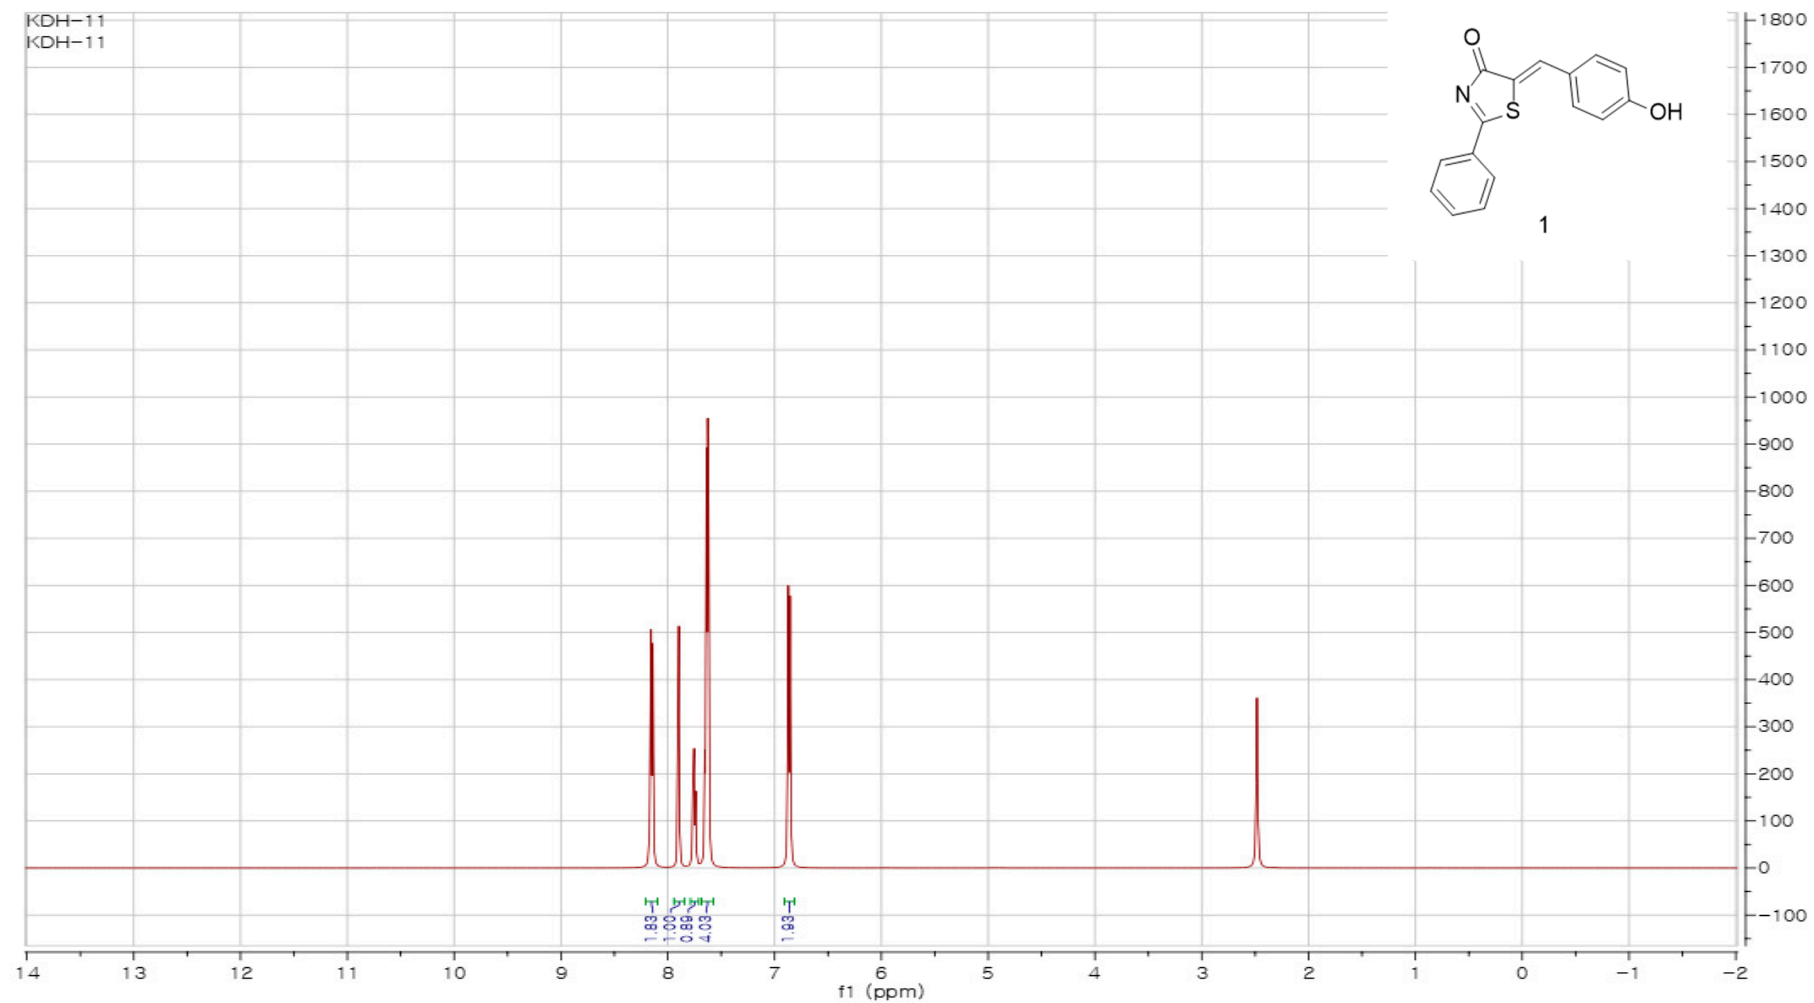

Figure S1.  $^1\text{H}$  NMR spectrum of compound **1**.

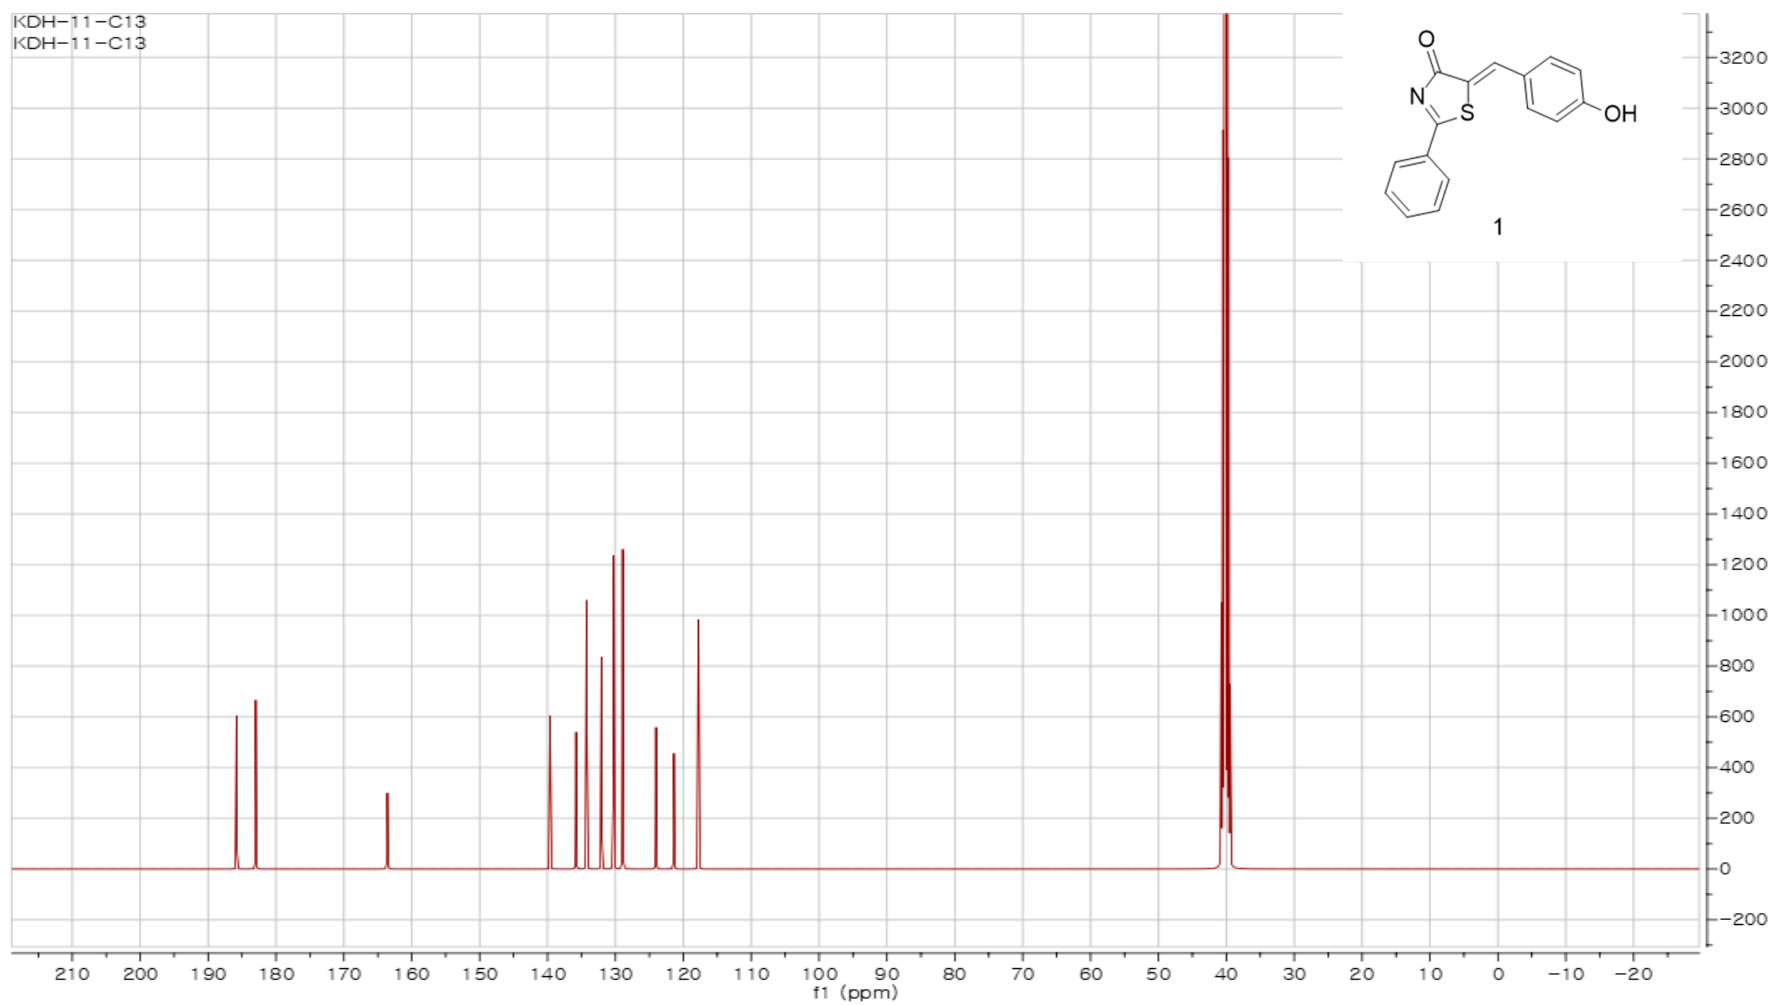

Figure S2.  $^{13}\text{C}$  NMR spectrum of compound 1.

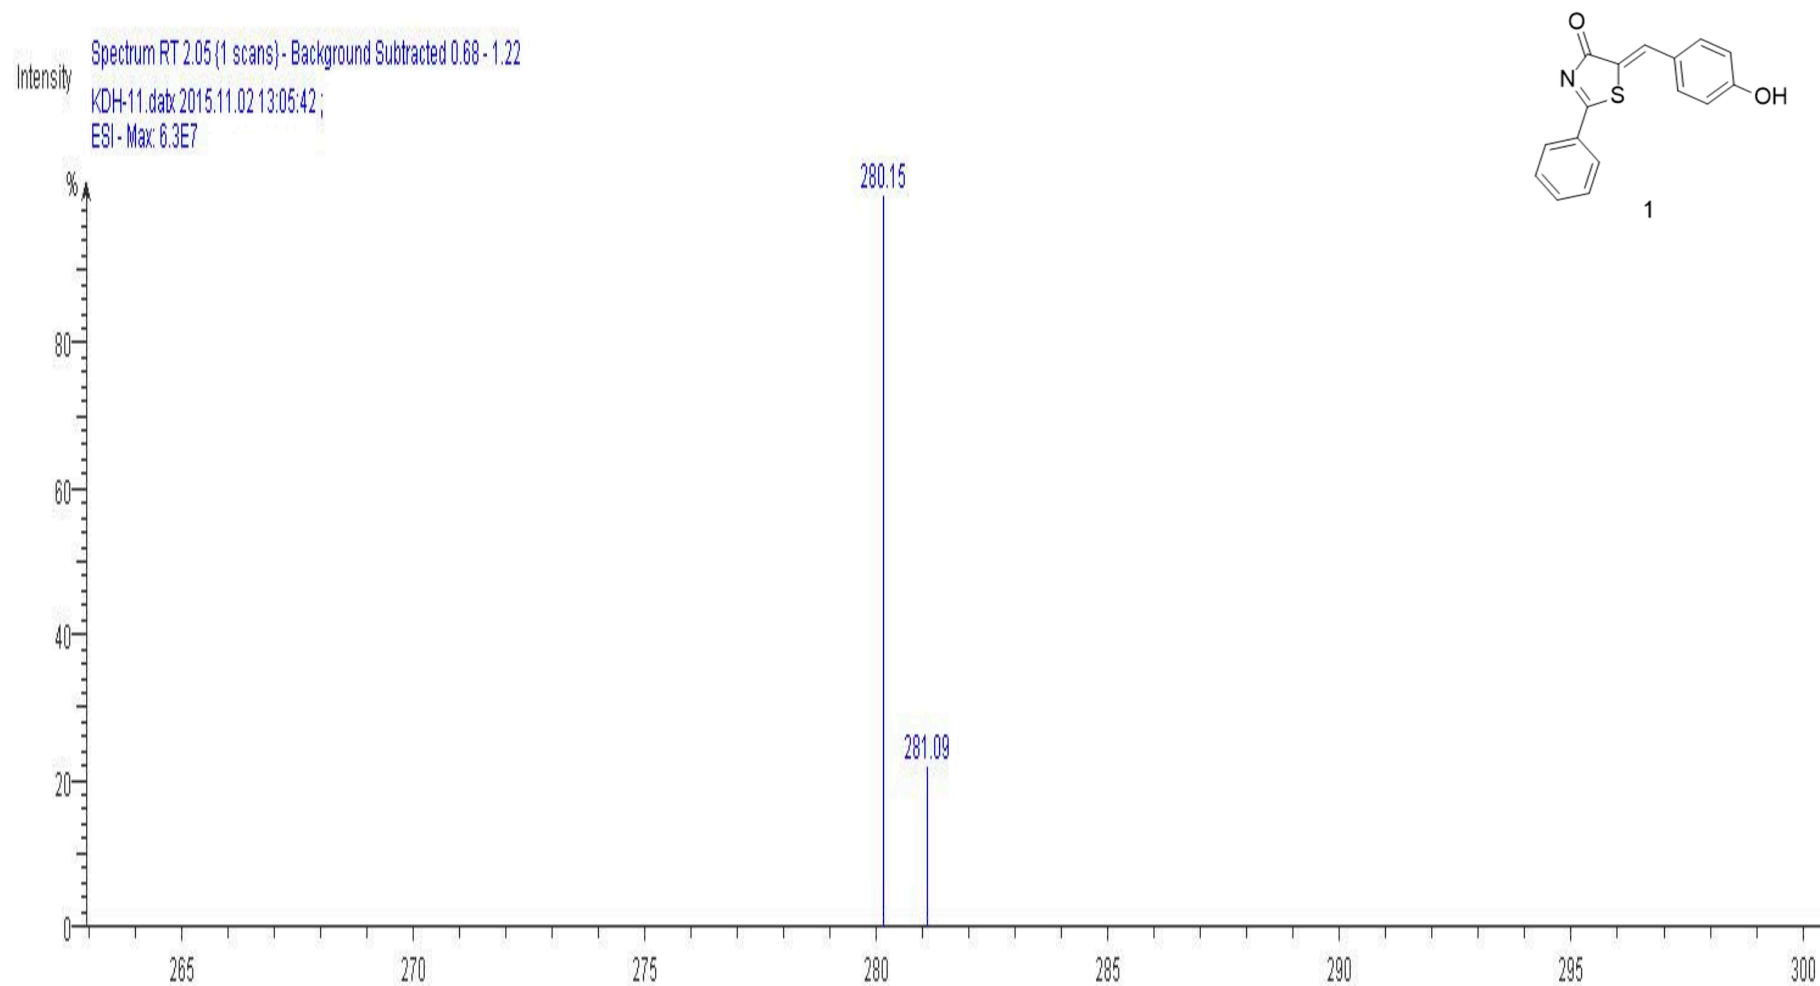

Figure S3. LRMS spectrum of compound **1**.

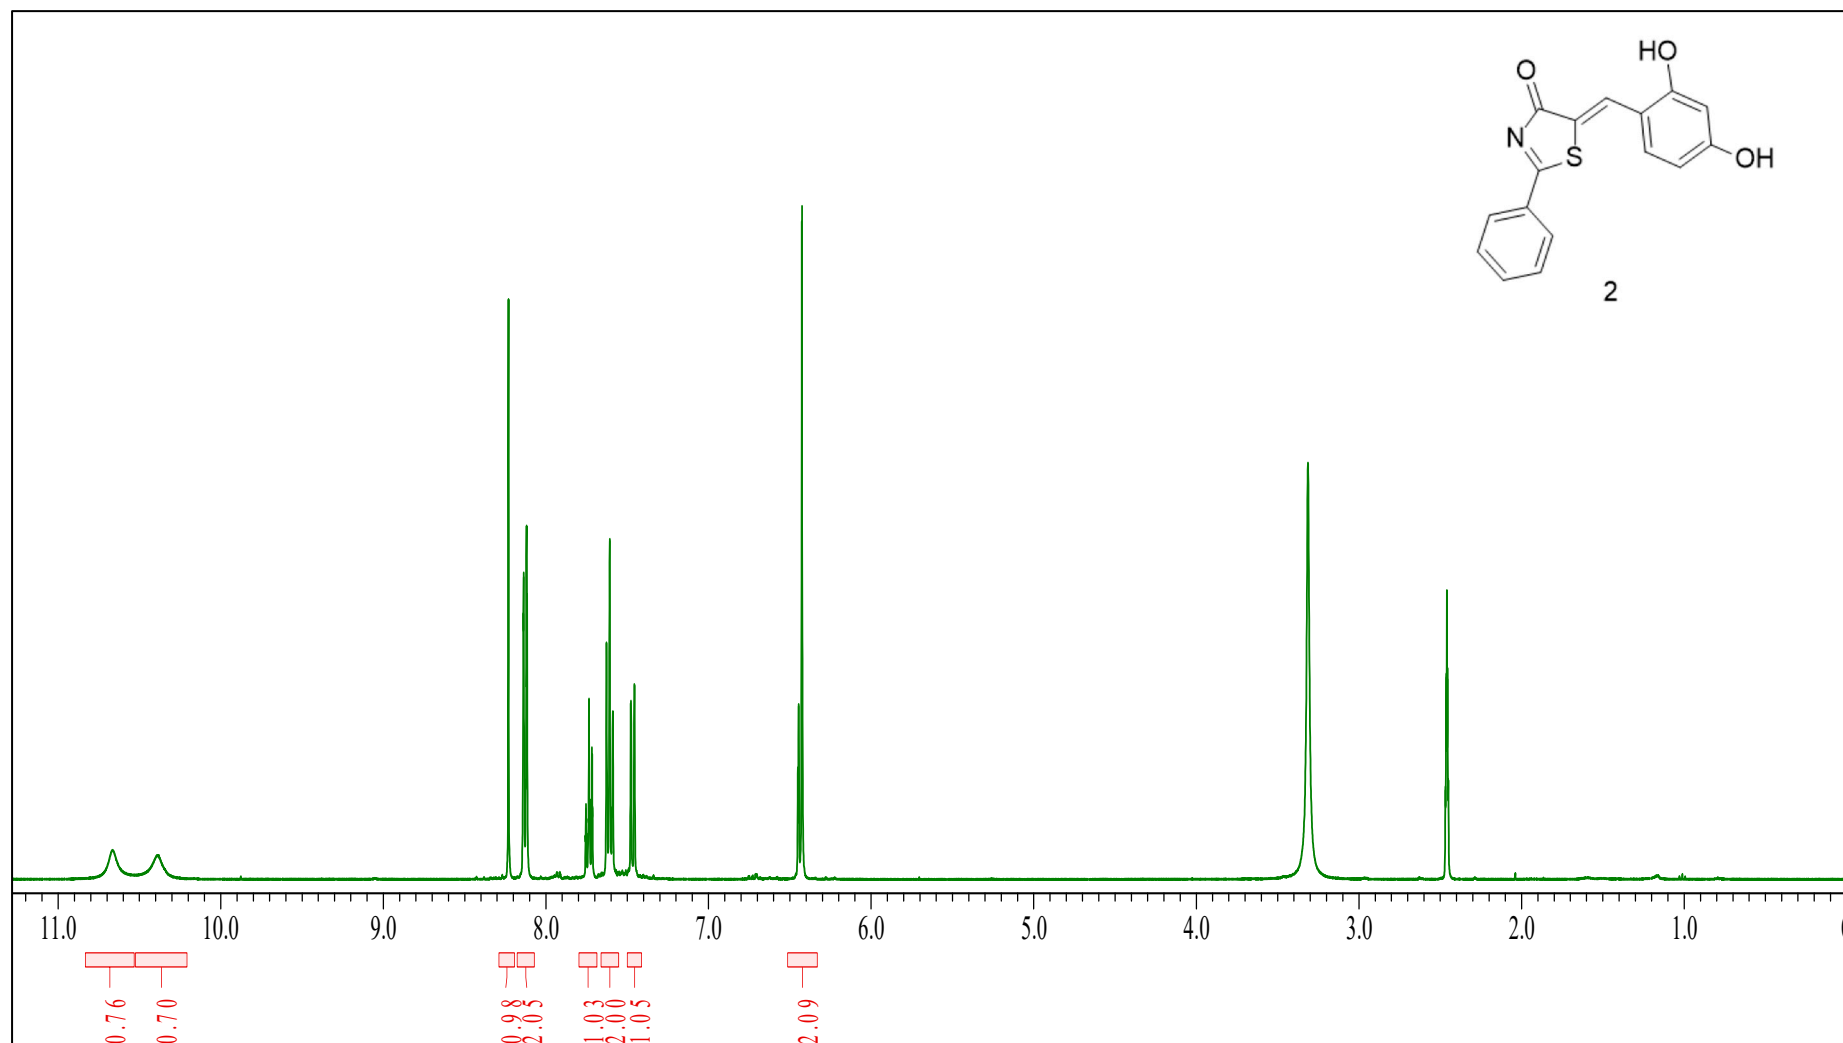

Figure S4. <sup>1</sup>H NMR spectrum of compound **2**.

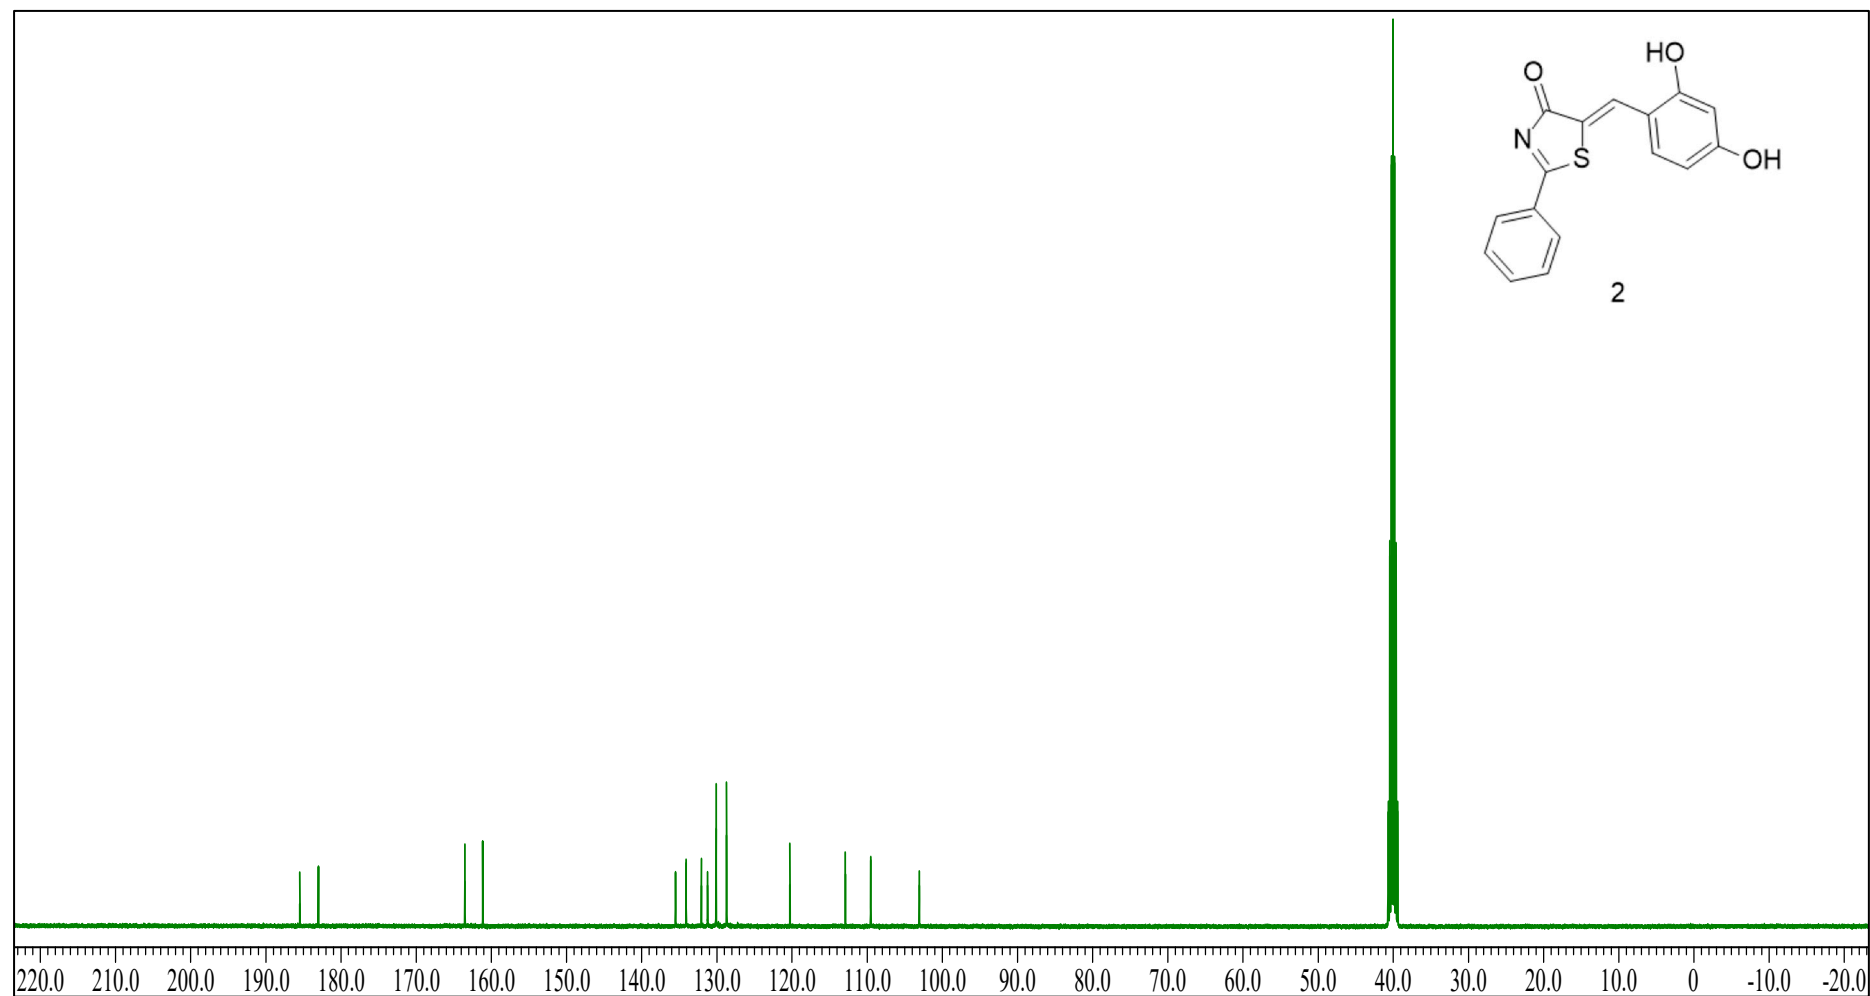

Figure S5.  $^{13}\text{C}$  NMR spectrum of compound **2**.

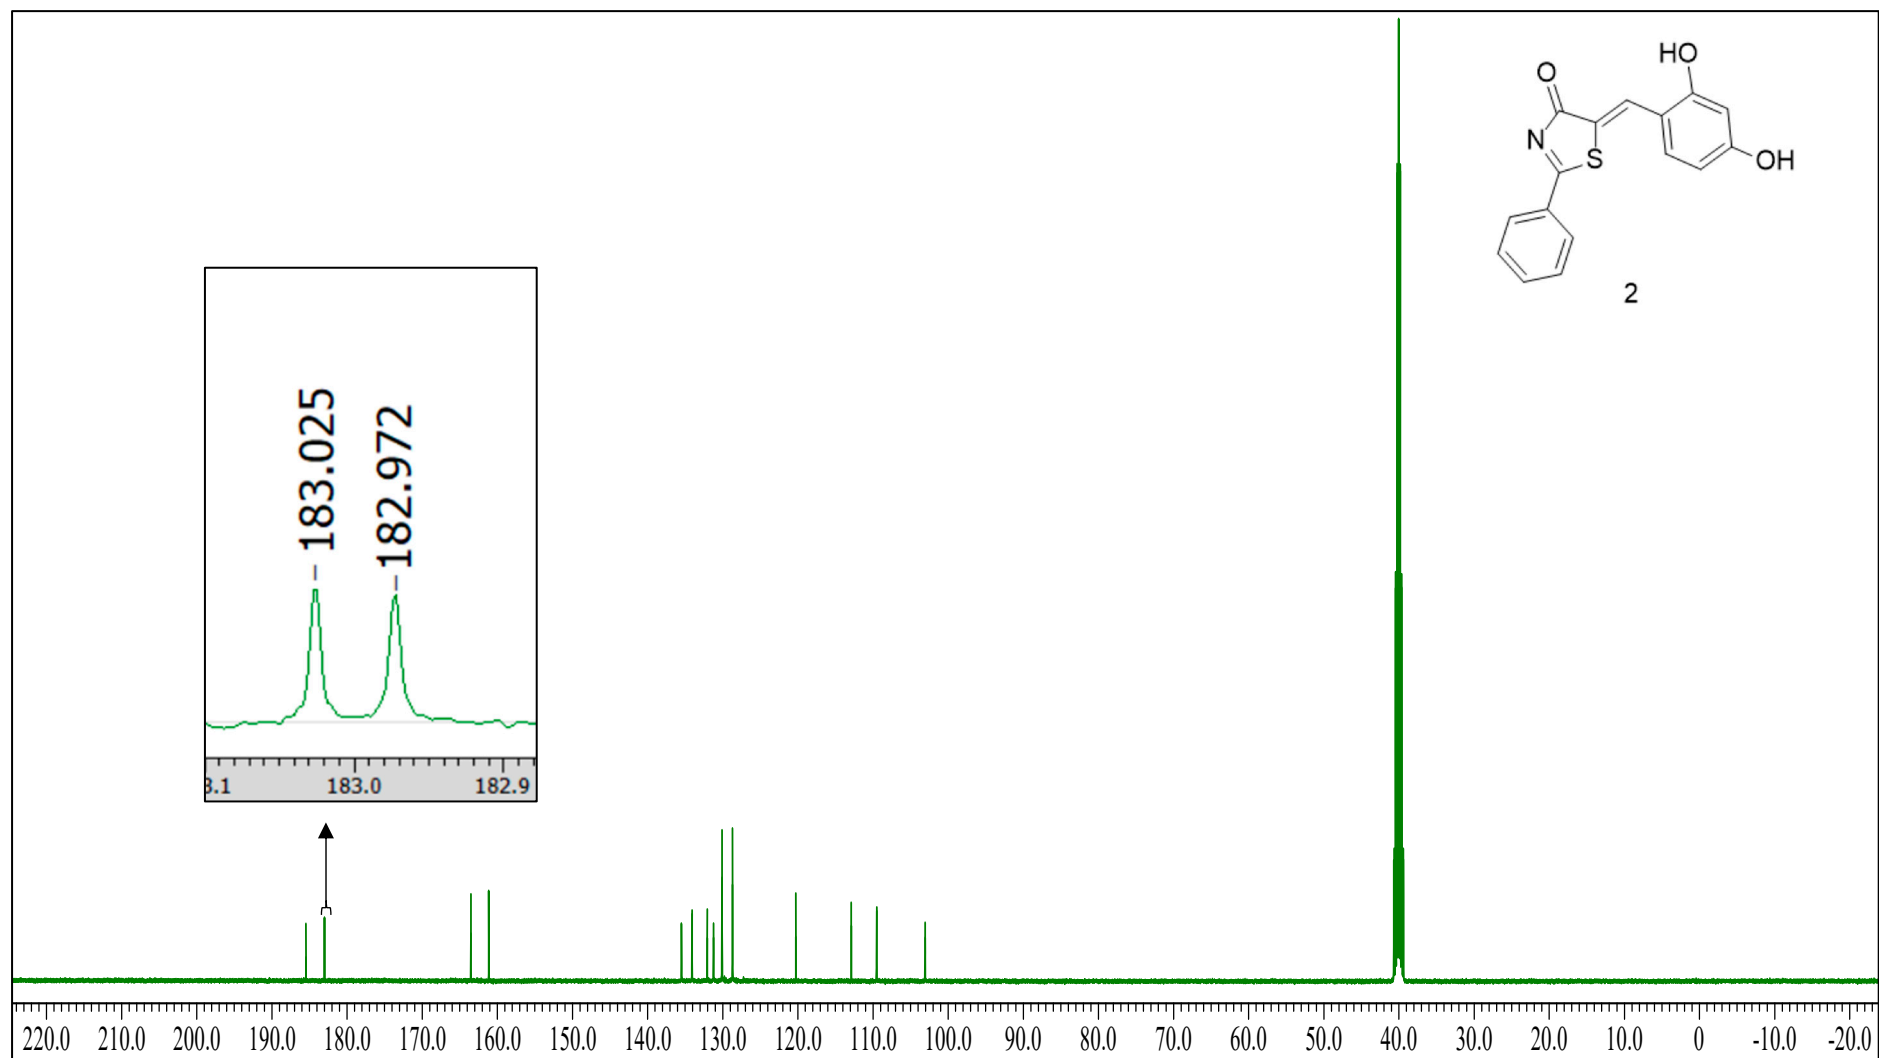

Figure S6. Proton-coupled  $^{13}\text{C}$  NMR spectrum of compound **2**.

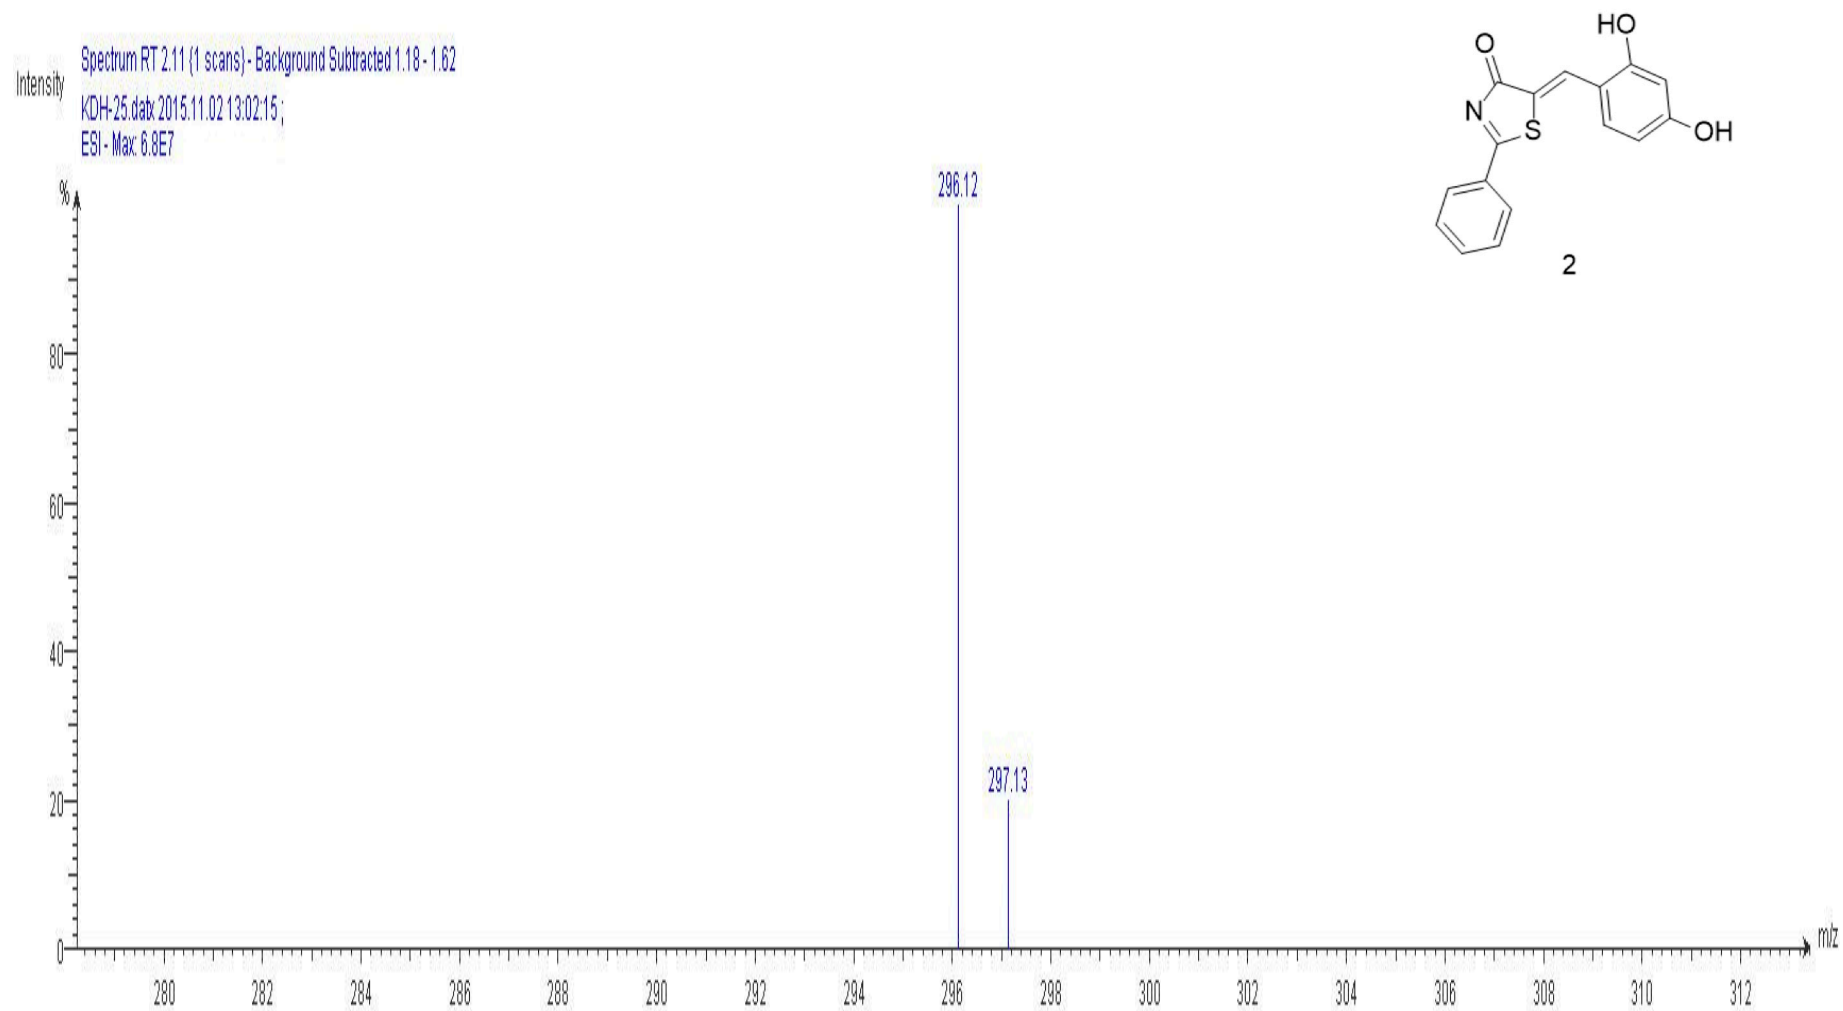

Figure S7. LRMS spectrum of compound **2**.

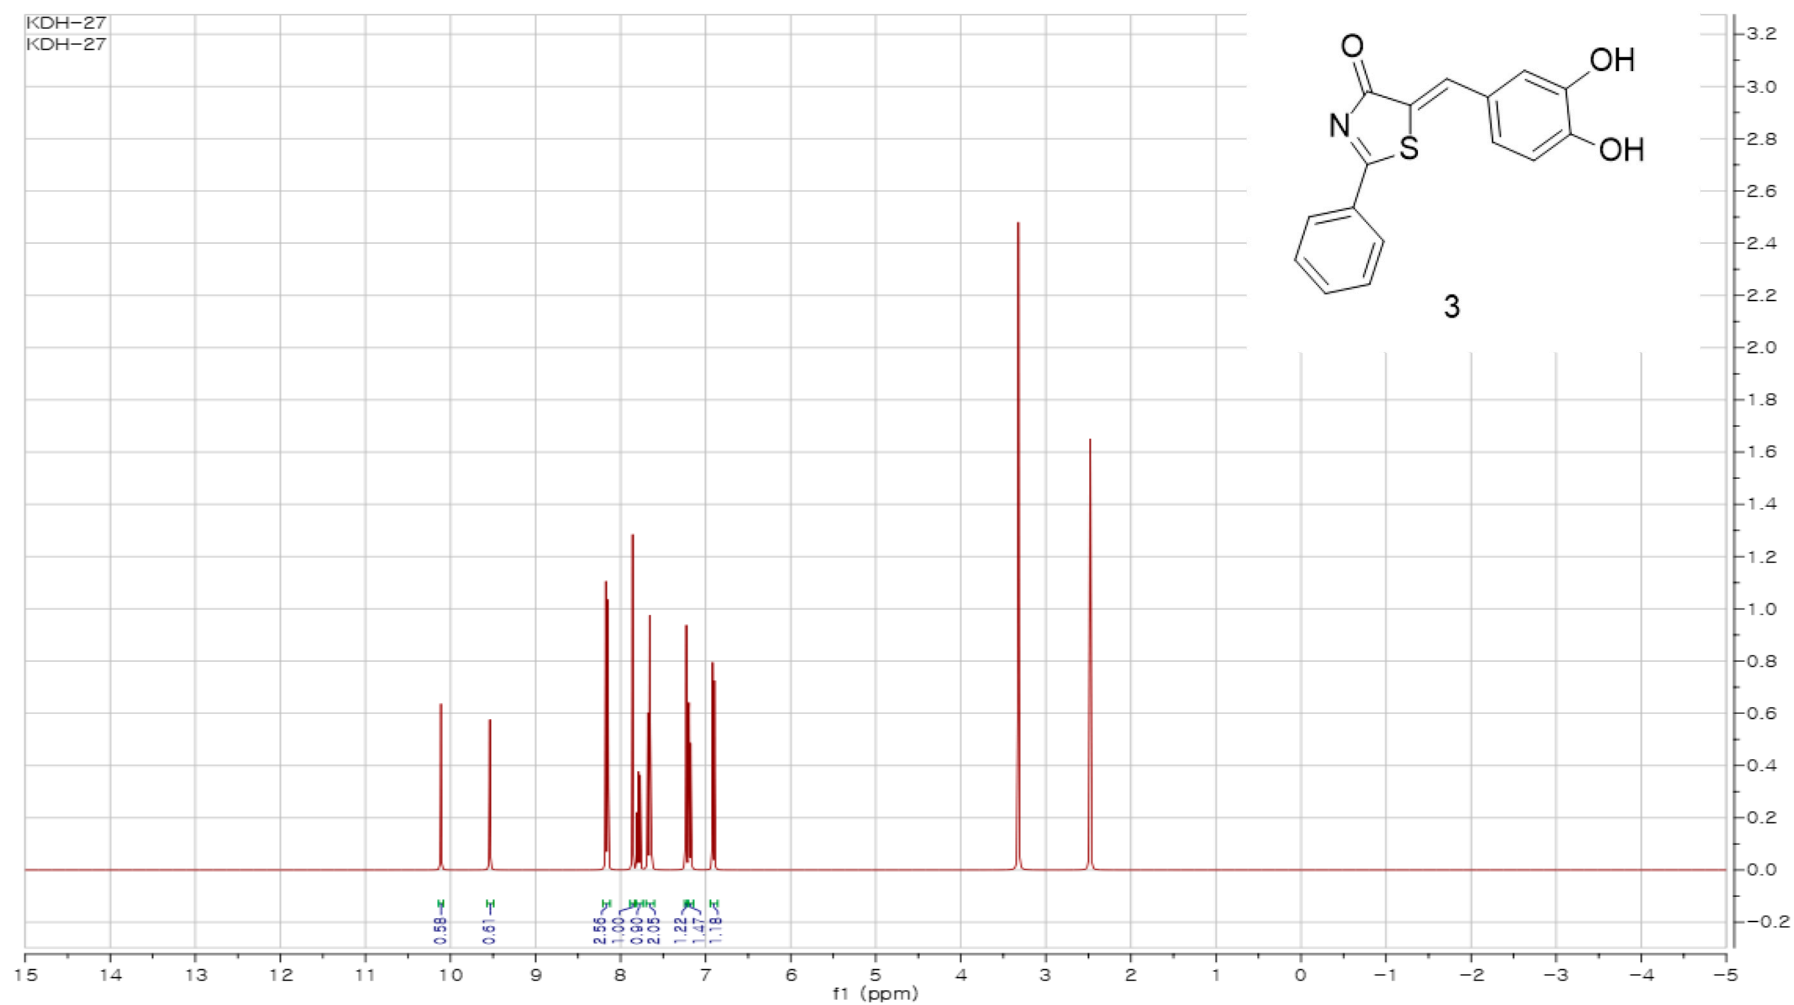

Figure S8.  $^1\text{H}$  NMR spectrum of compound **3**.

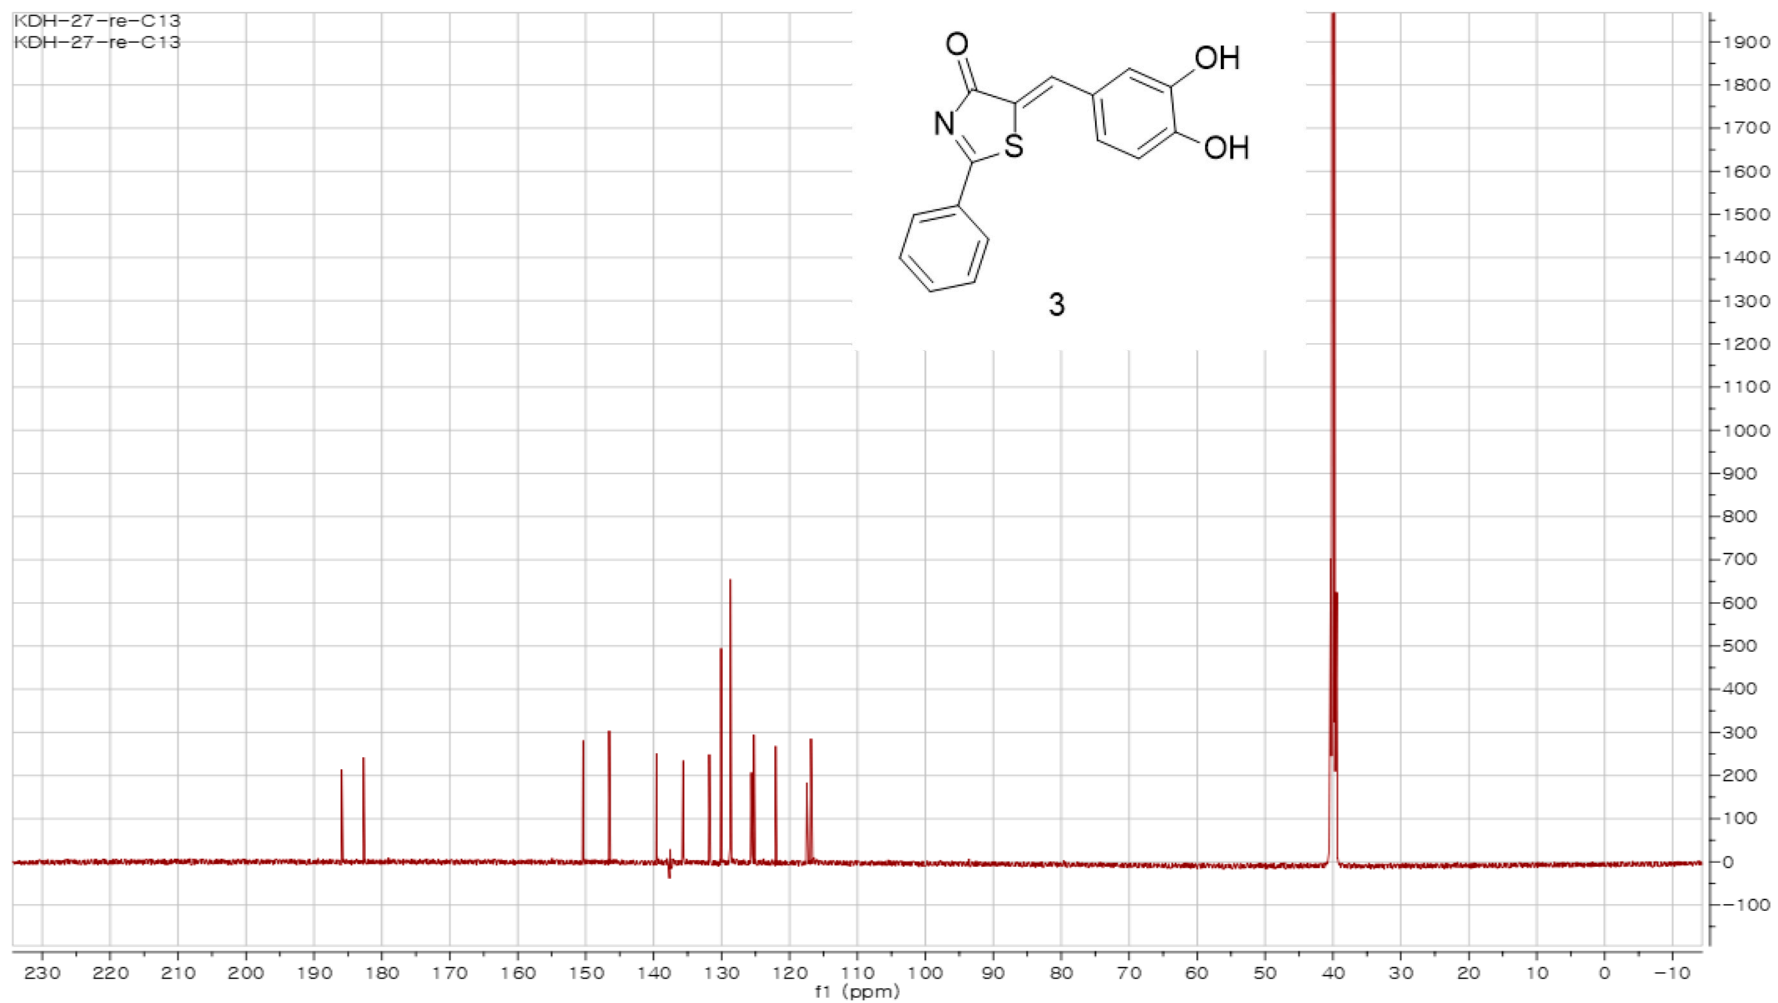

Figure S9.  $^{13}\text{C}$  NMR spectrum of compound 3.

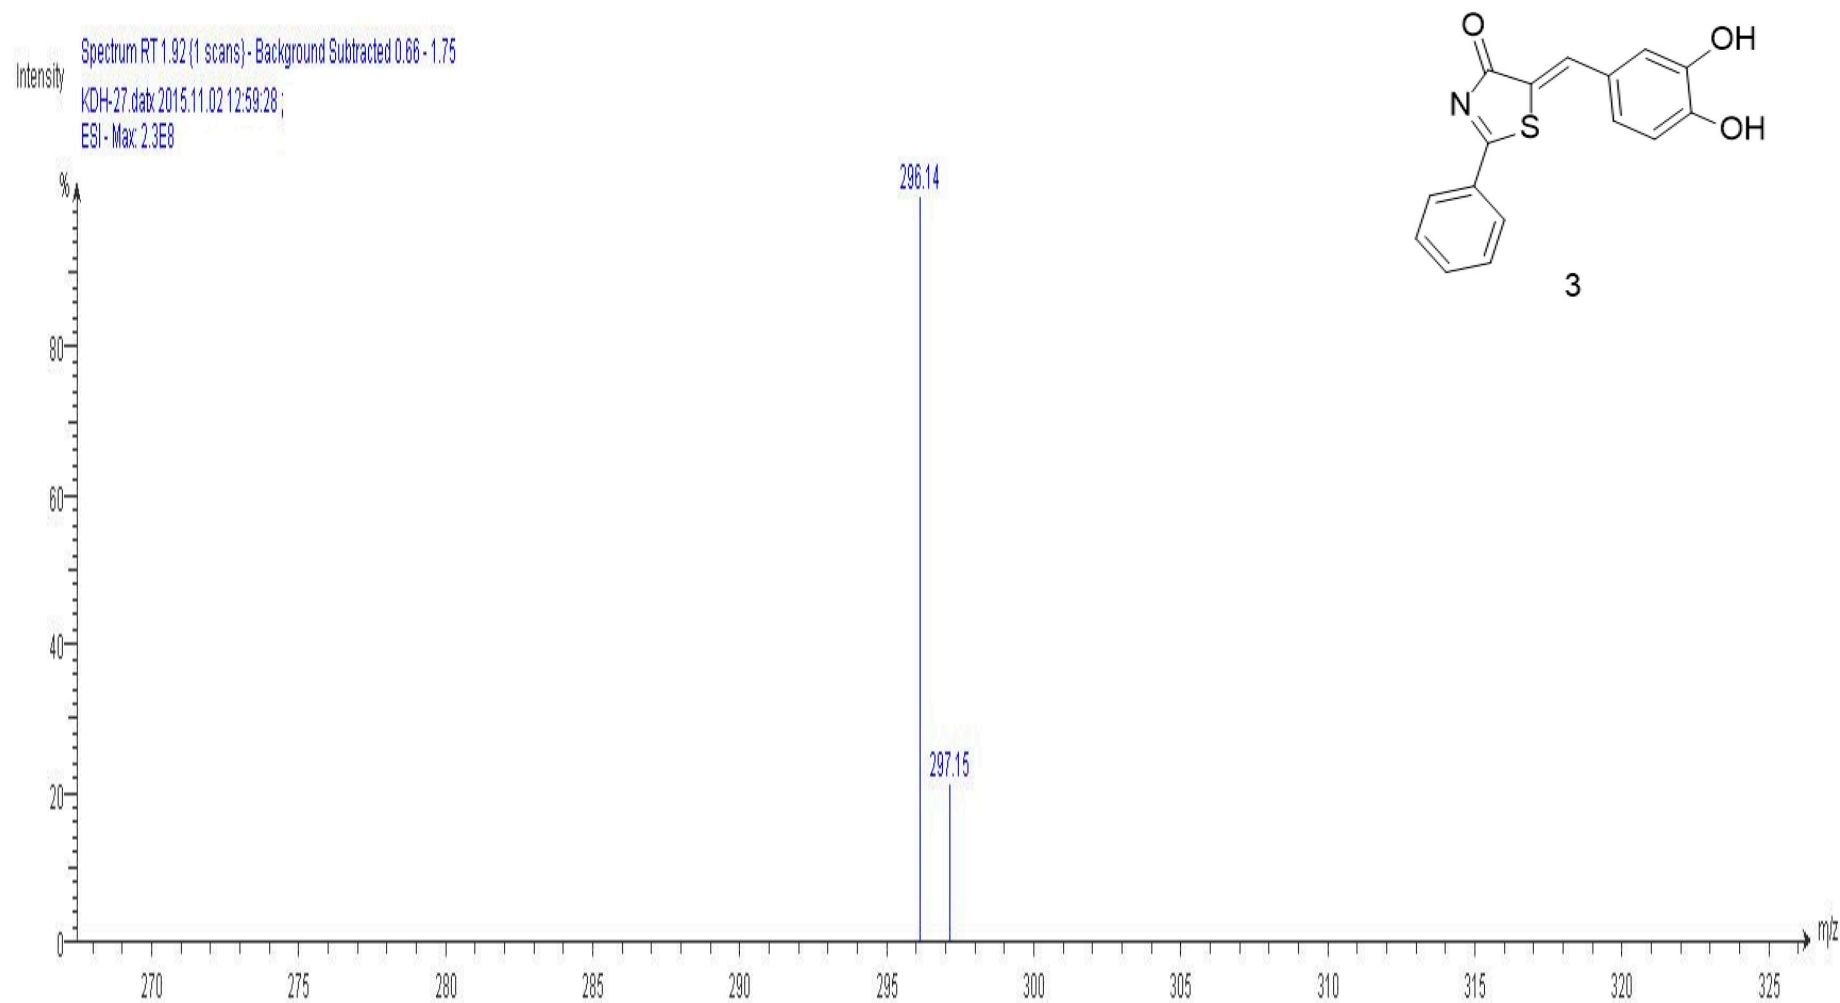

Figure S10. LRMS spectrum of compound **3**.

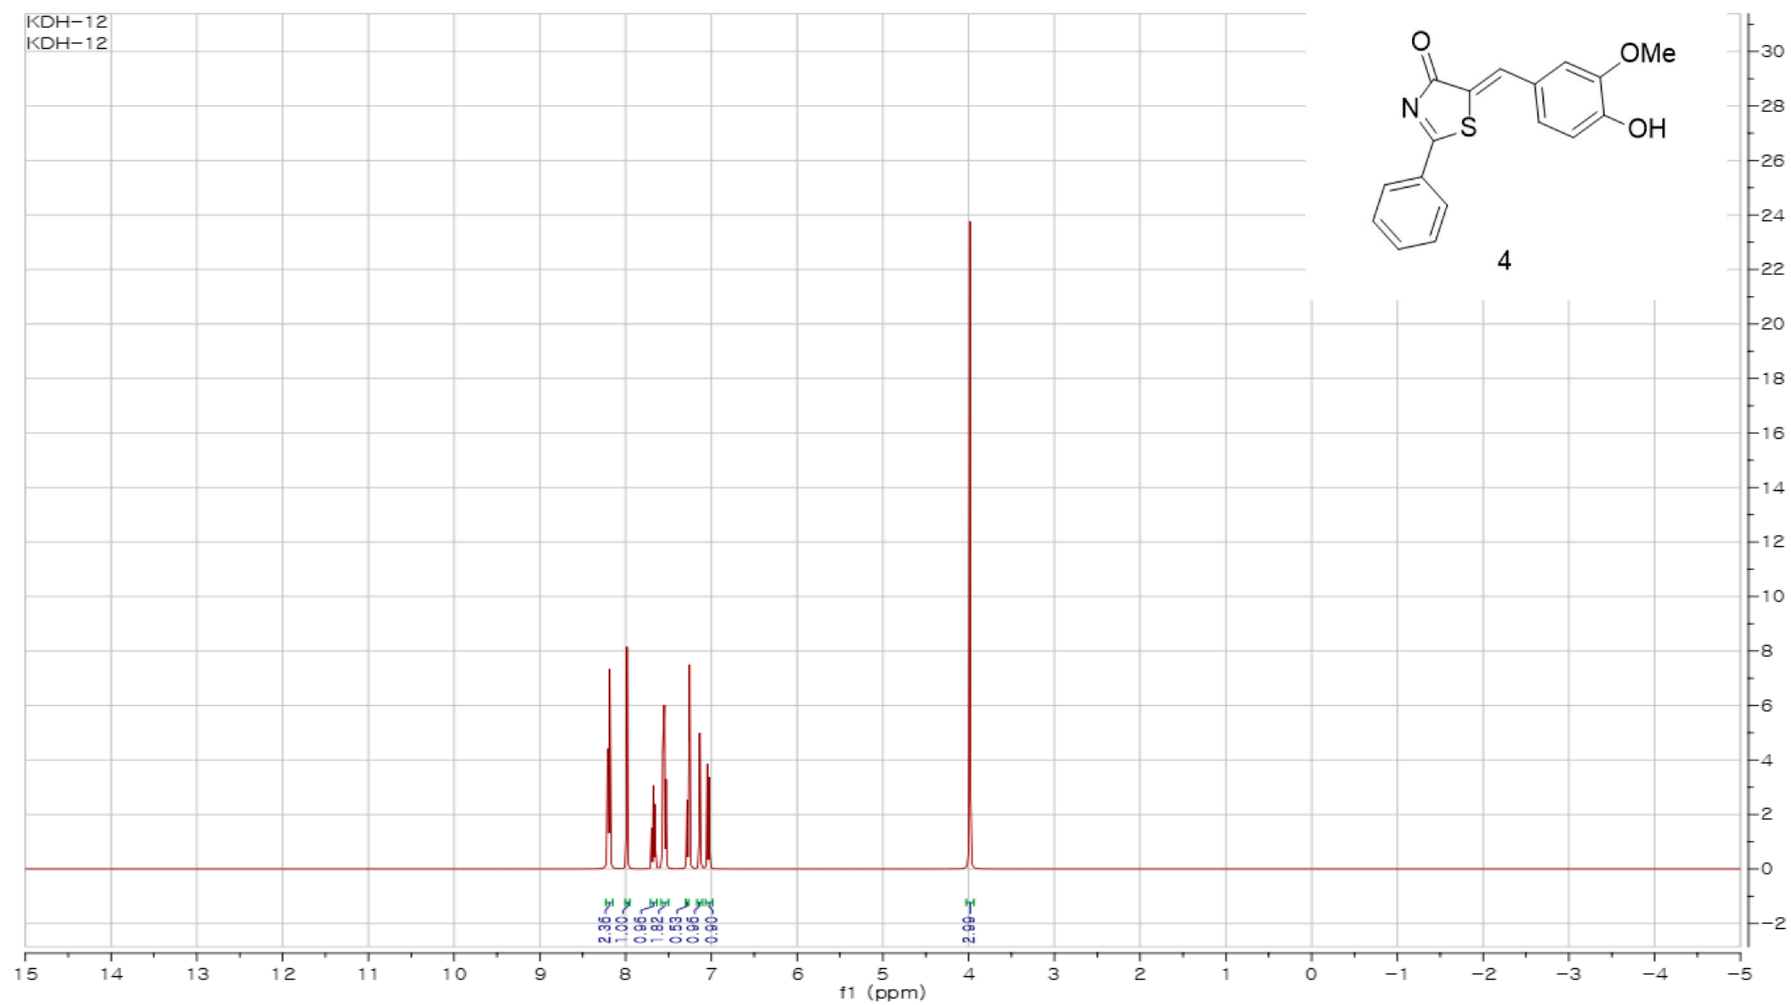

Figure S11.  $^1\text{H}$  NMR spectrum of compound 4.

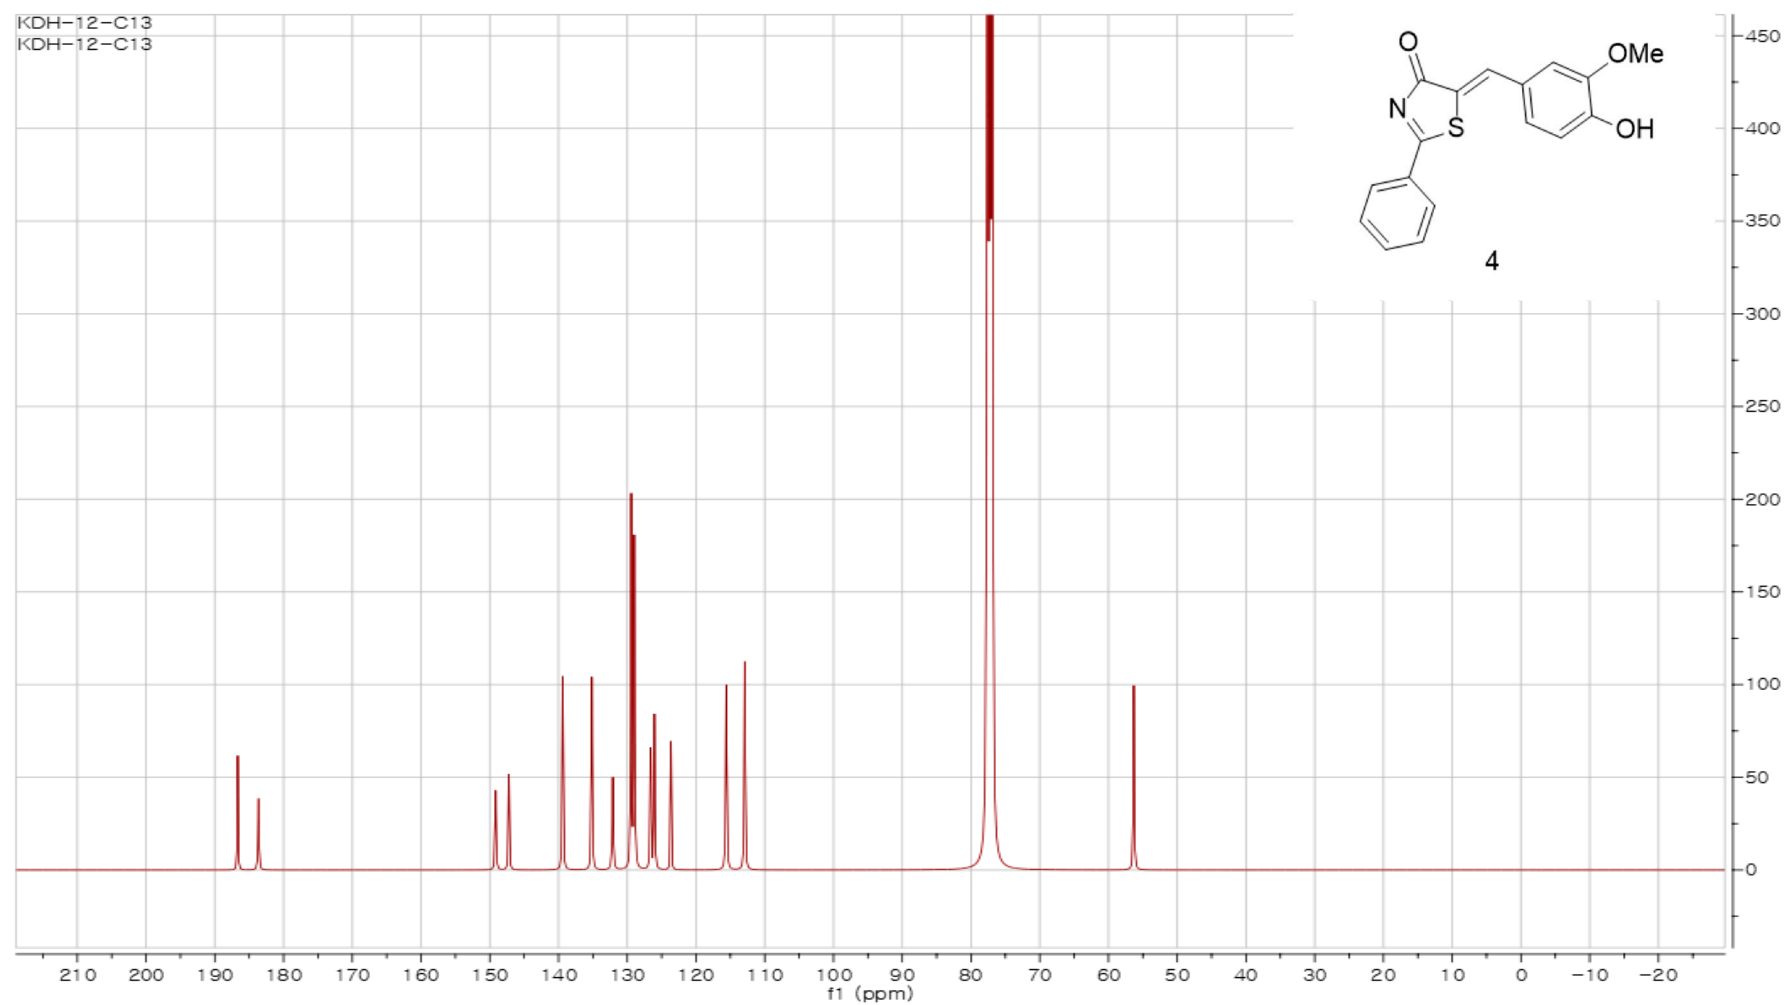

Figure S12.  $^{13}\text{C}$  NMR spectrum of compound 4.

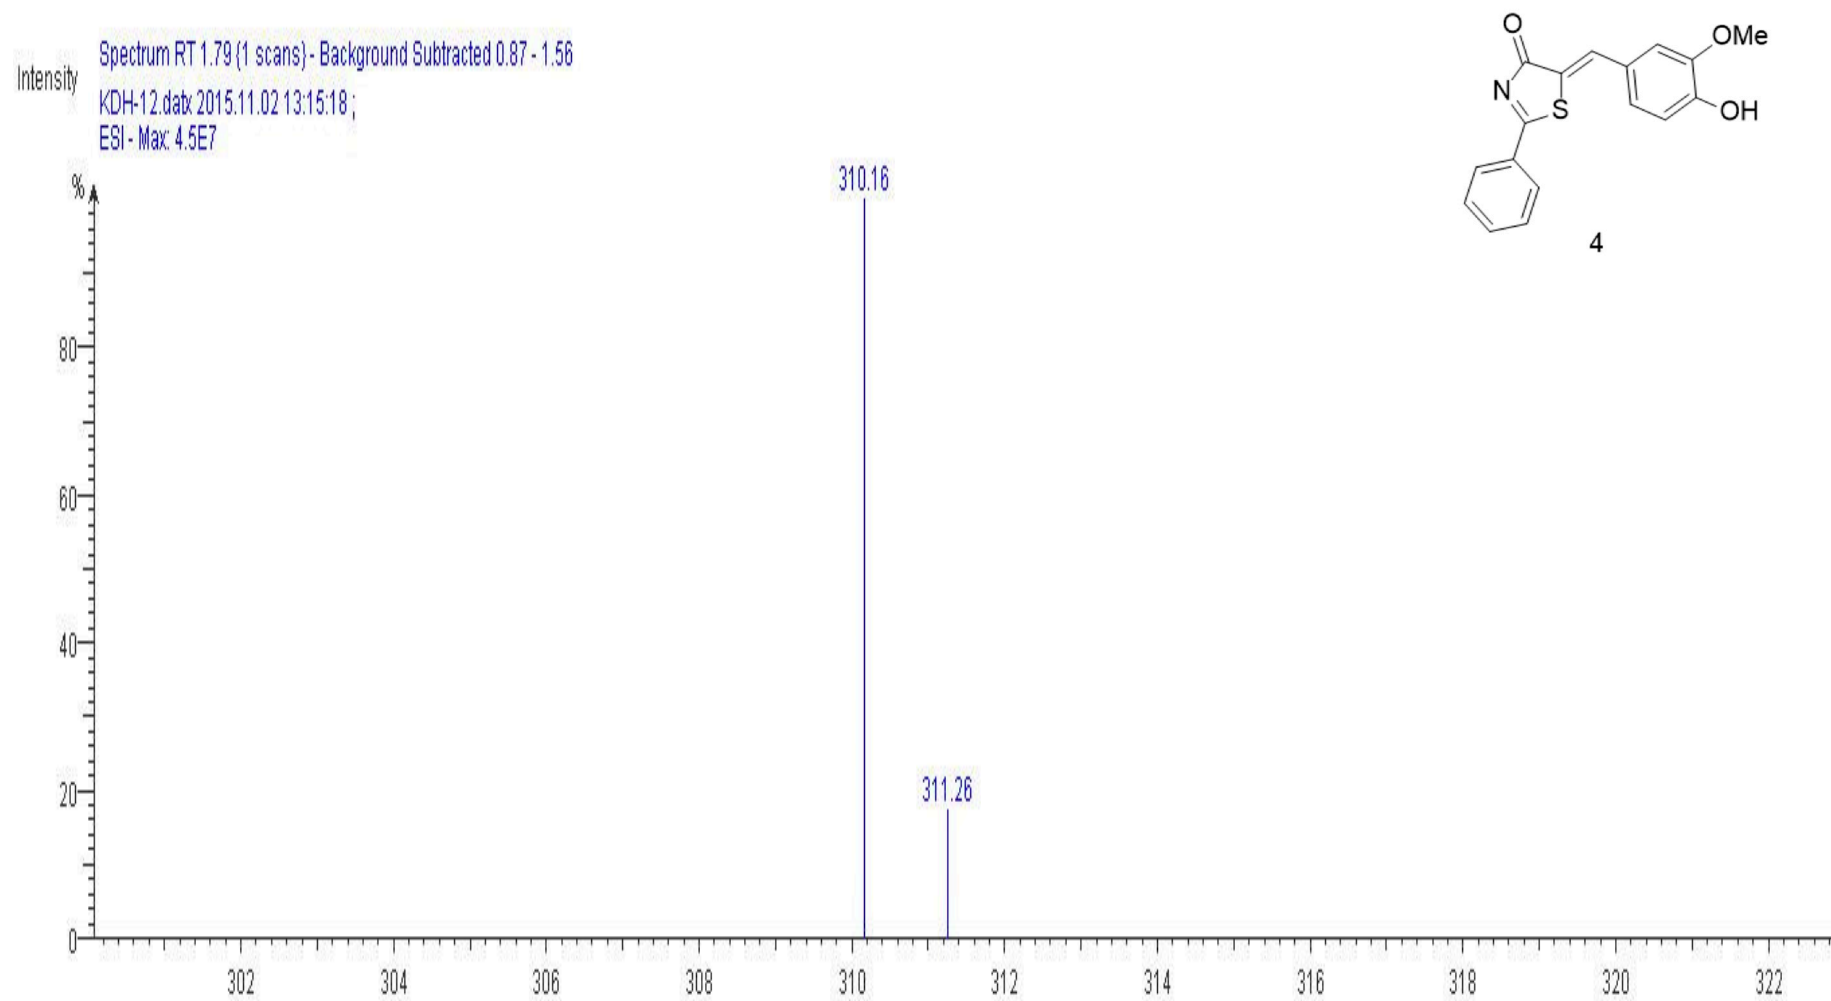

Figure S13. LRMS spectrum of compound 4.

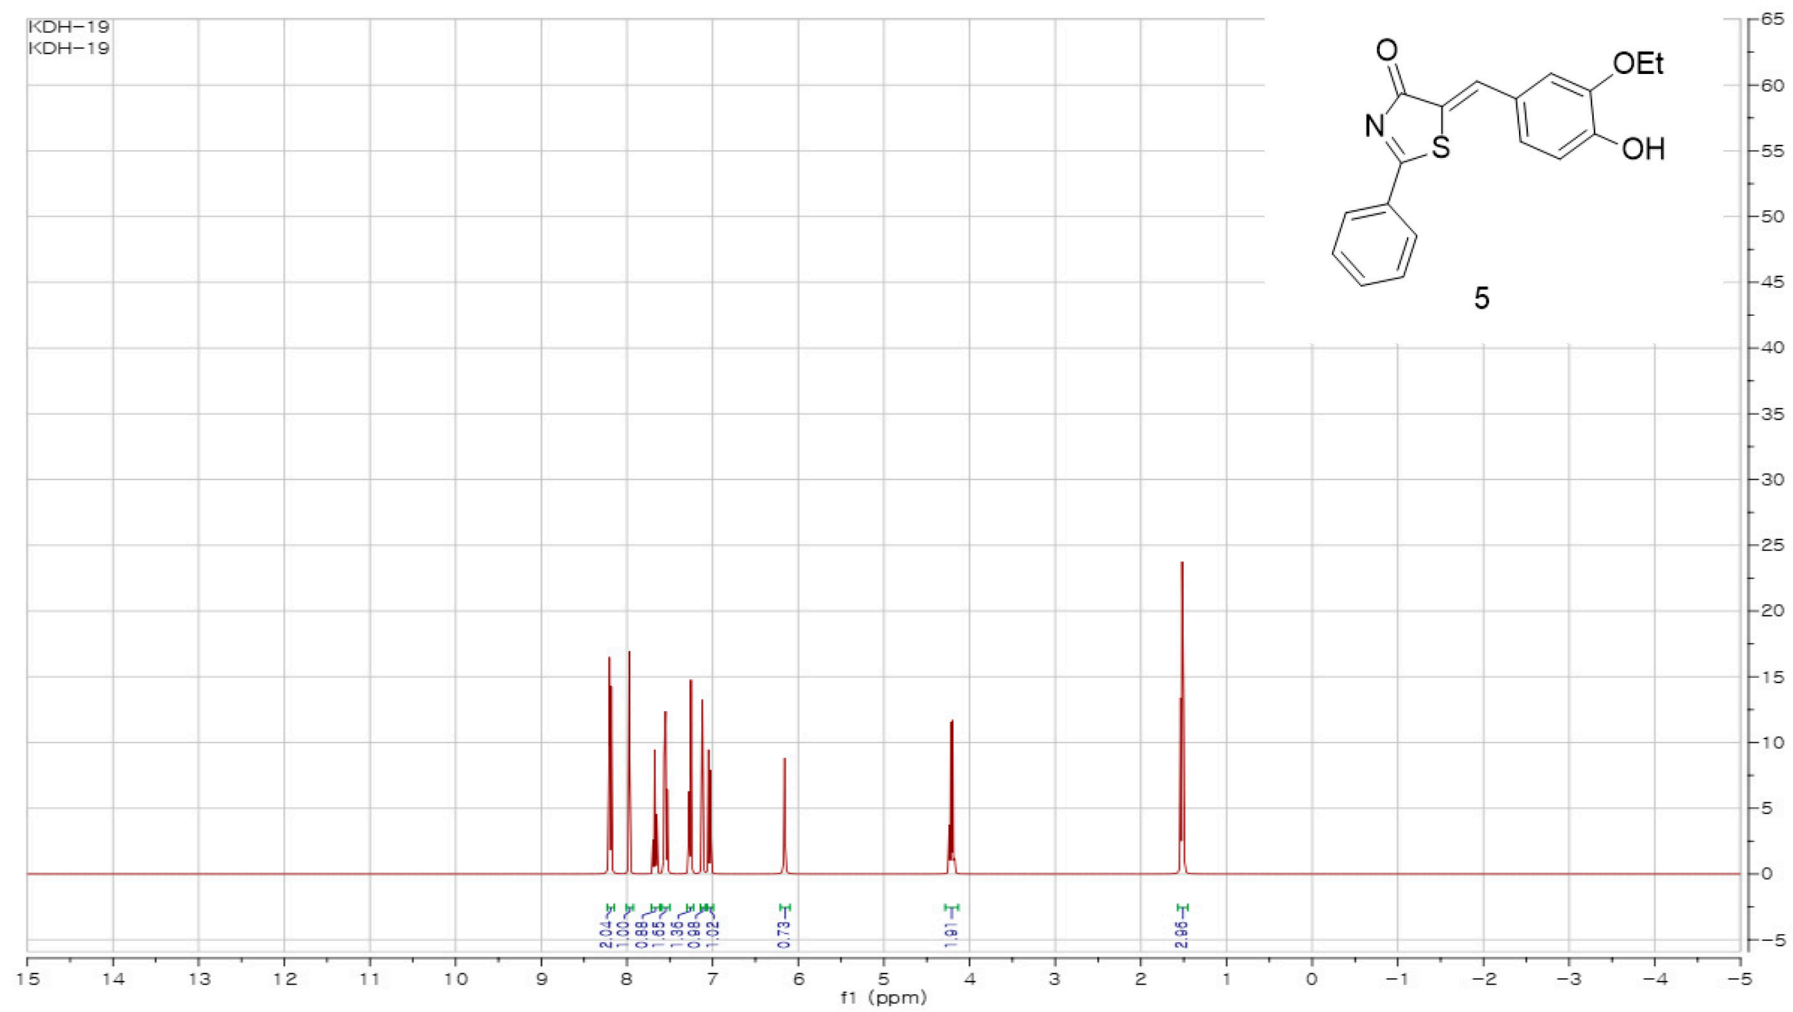

Figure S14.  $^1\text{H}$  NMR spectrum of compound **5**.

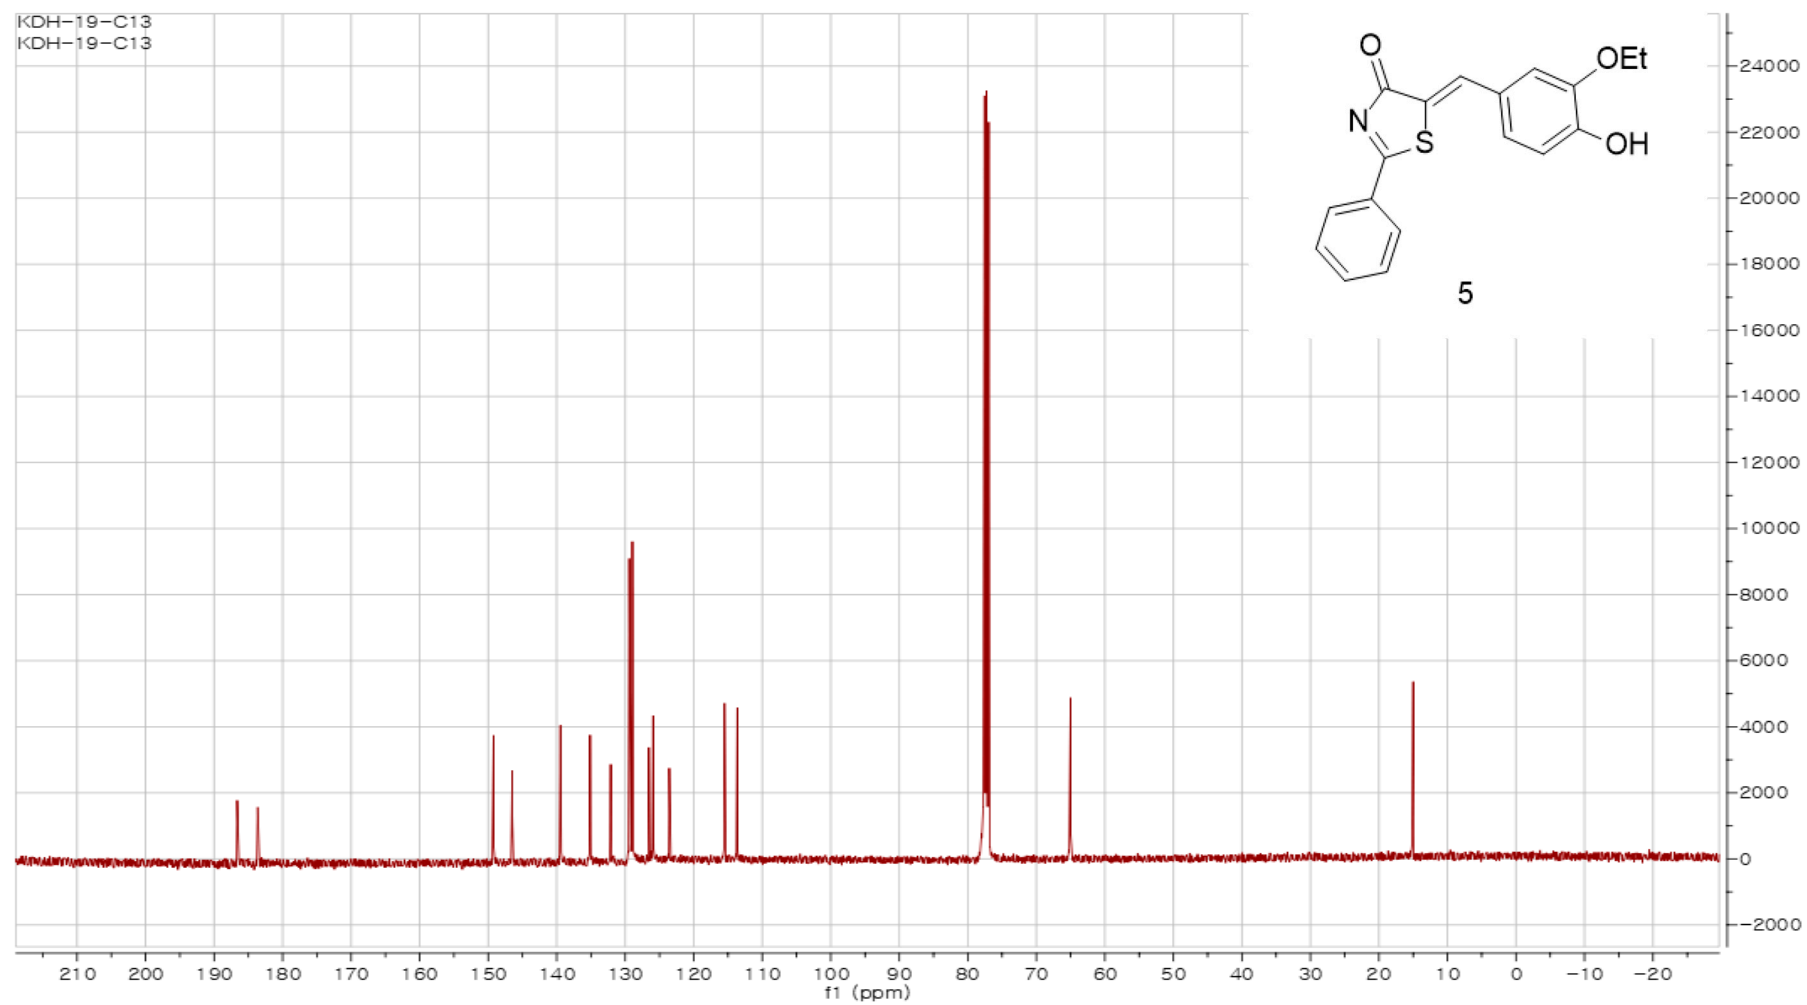

Figure S15.  $^{13}\text{C}$  NMR spectrum of compound **5**.

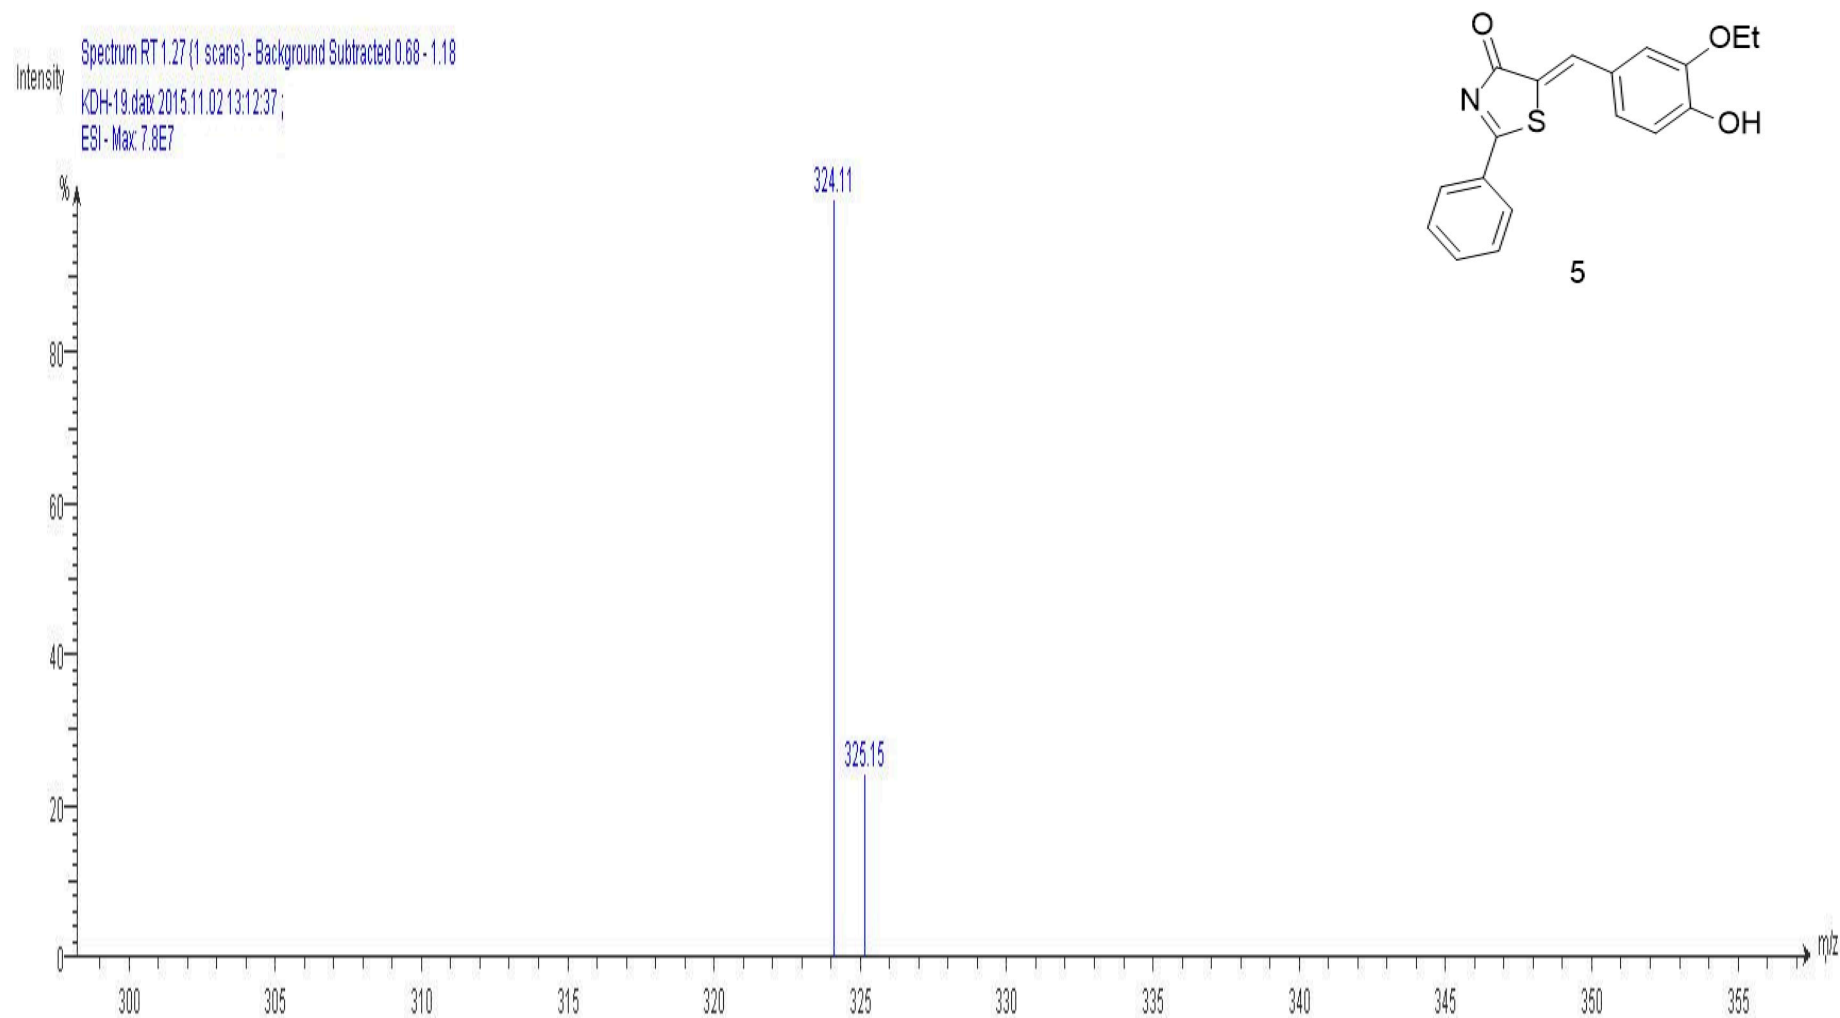

Figure S16. LRMS spectrum of compound **5**.

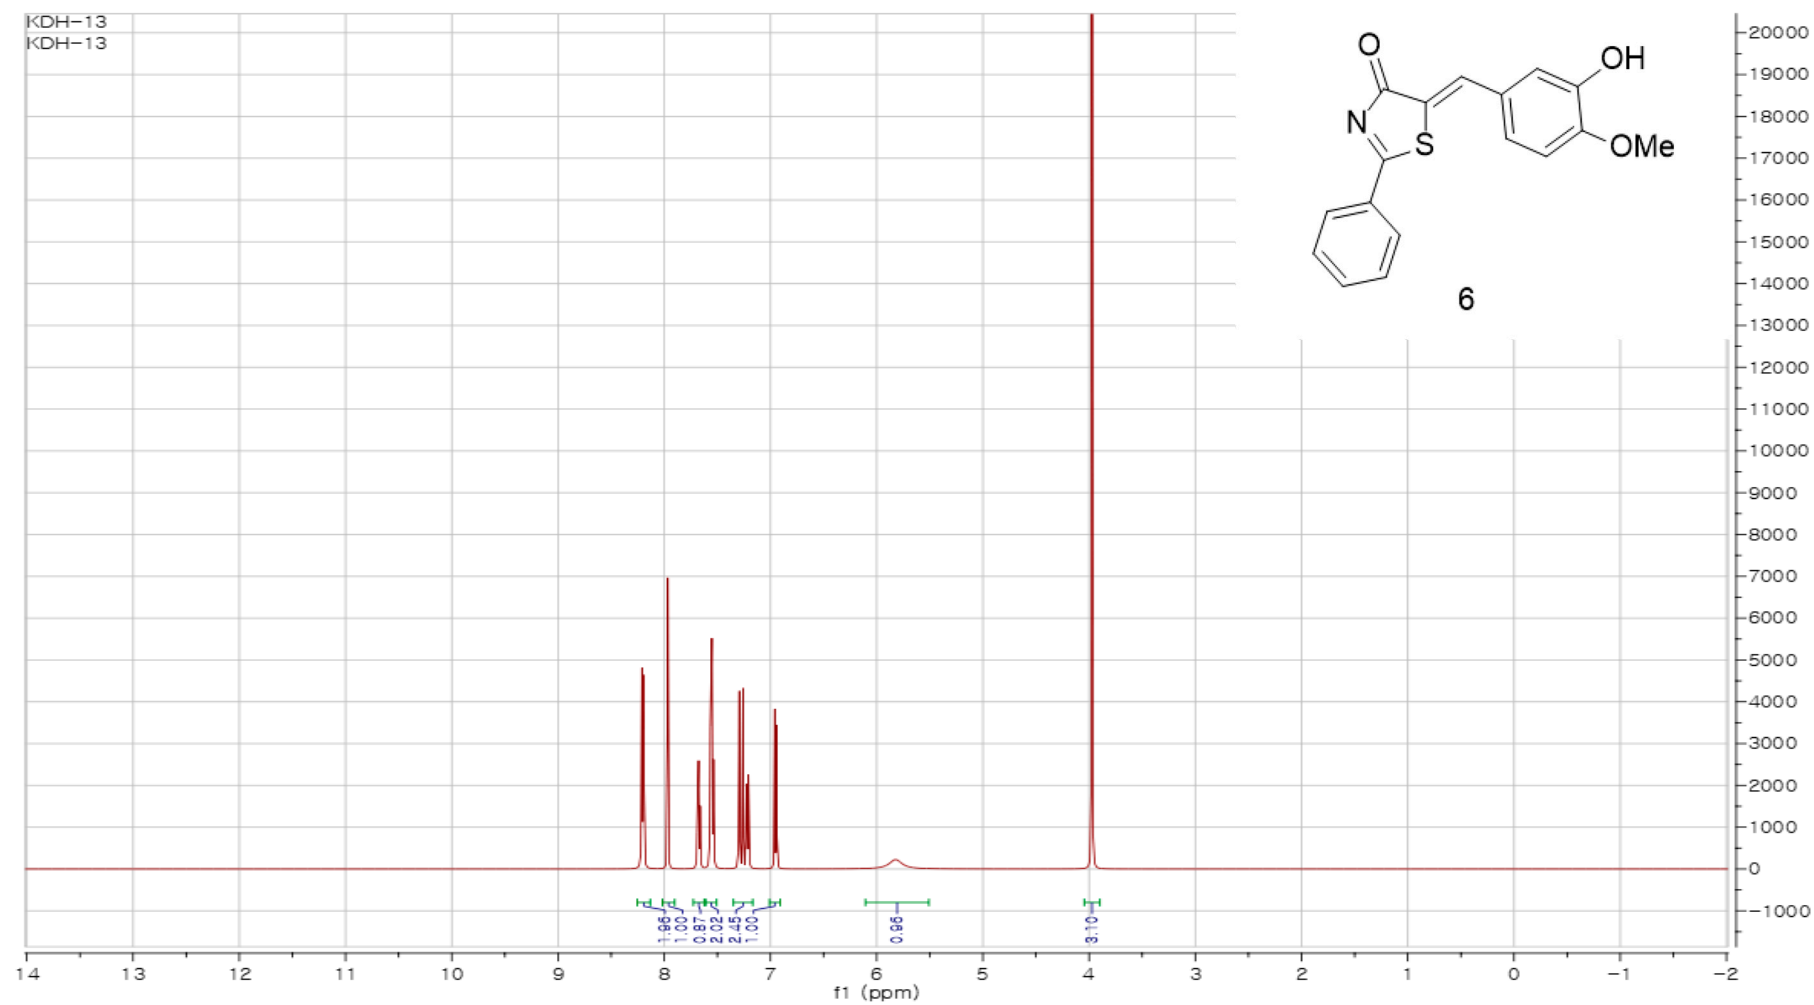

Figure S17. <sup>1</sup>H NMR spectrum of compound **6**.

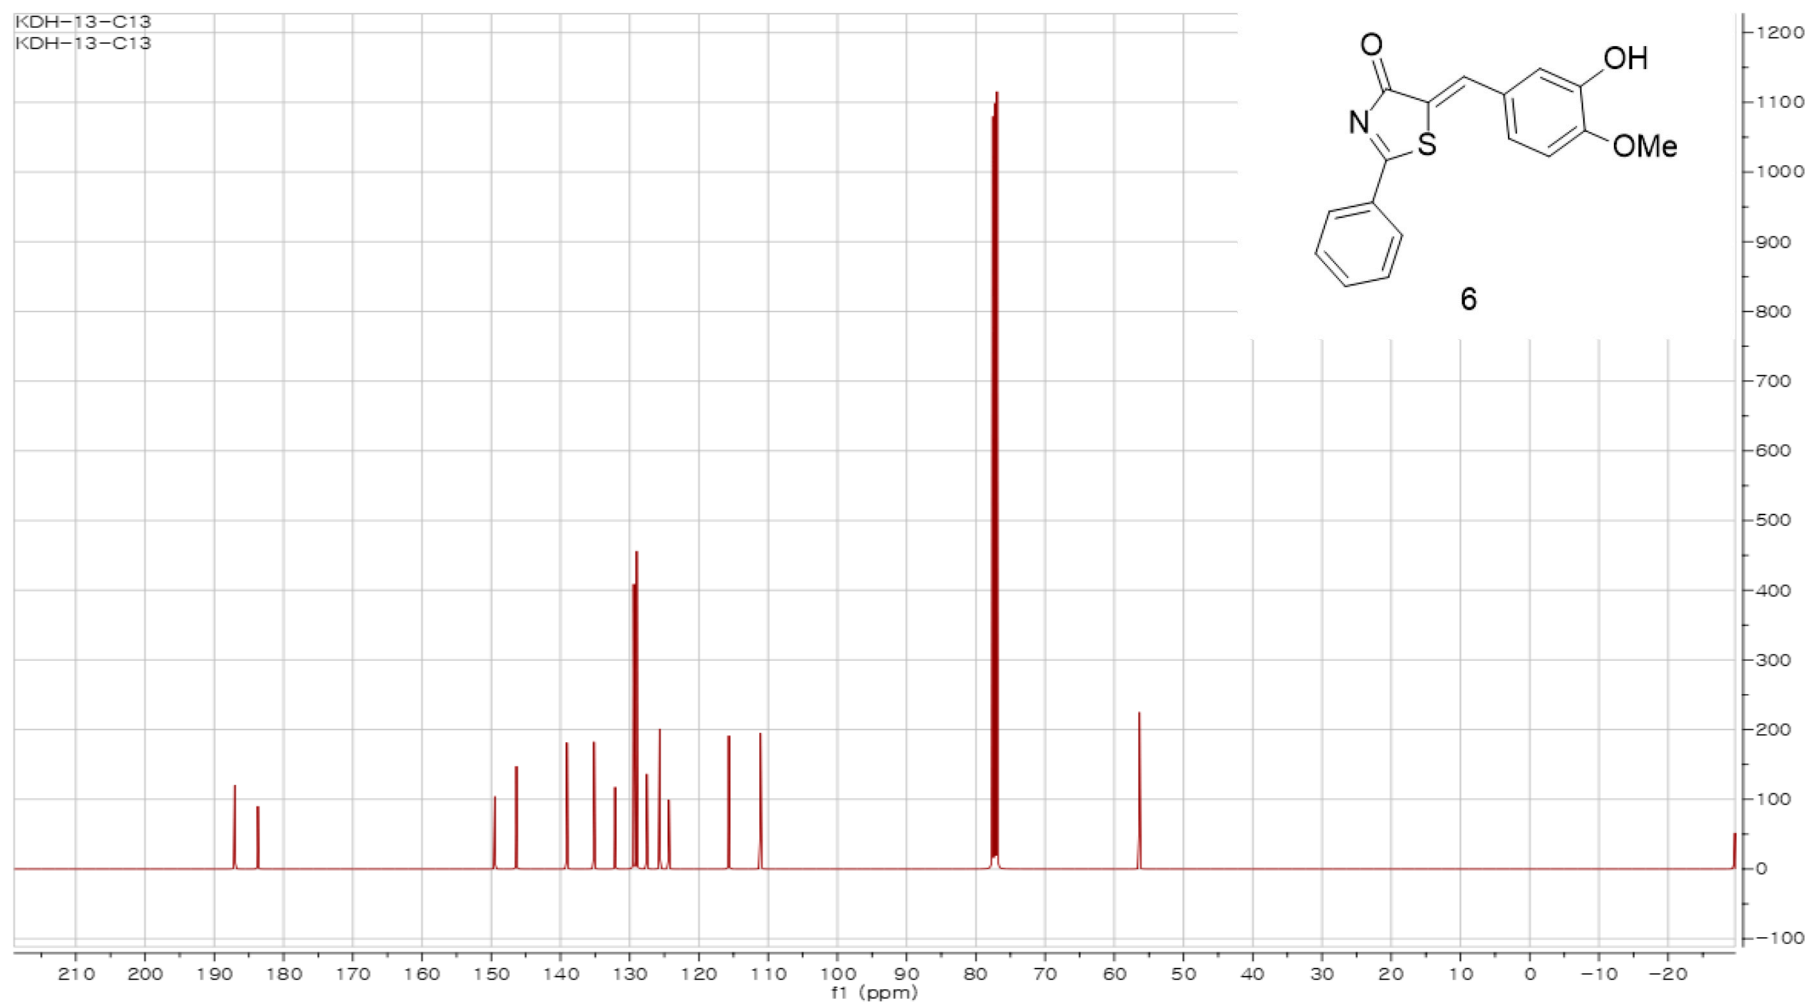

Figure S18.  $^{13}\text{C}$  NMR spectrum of compound **6**.

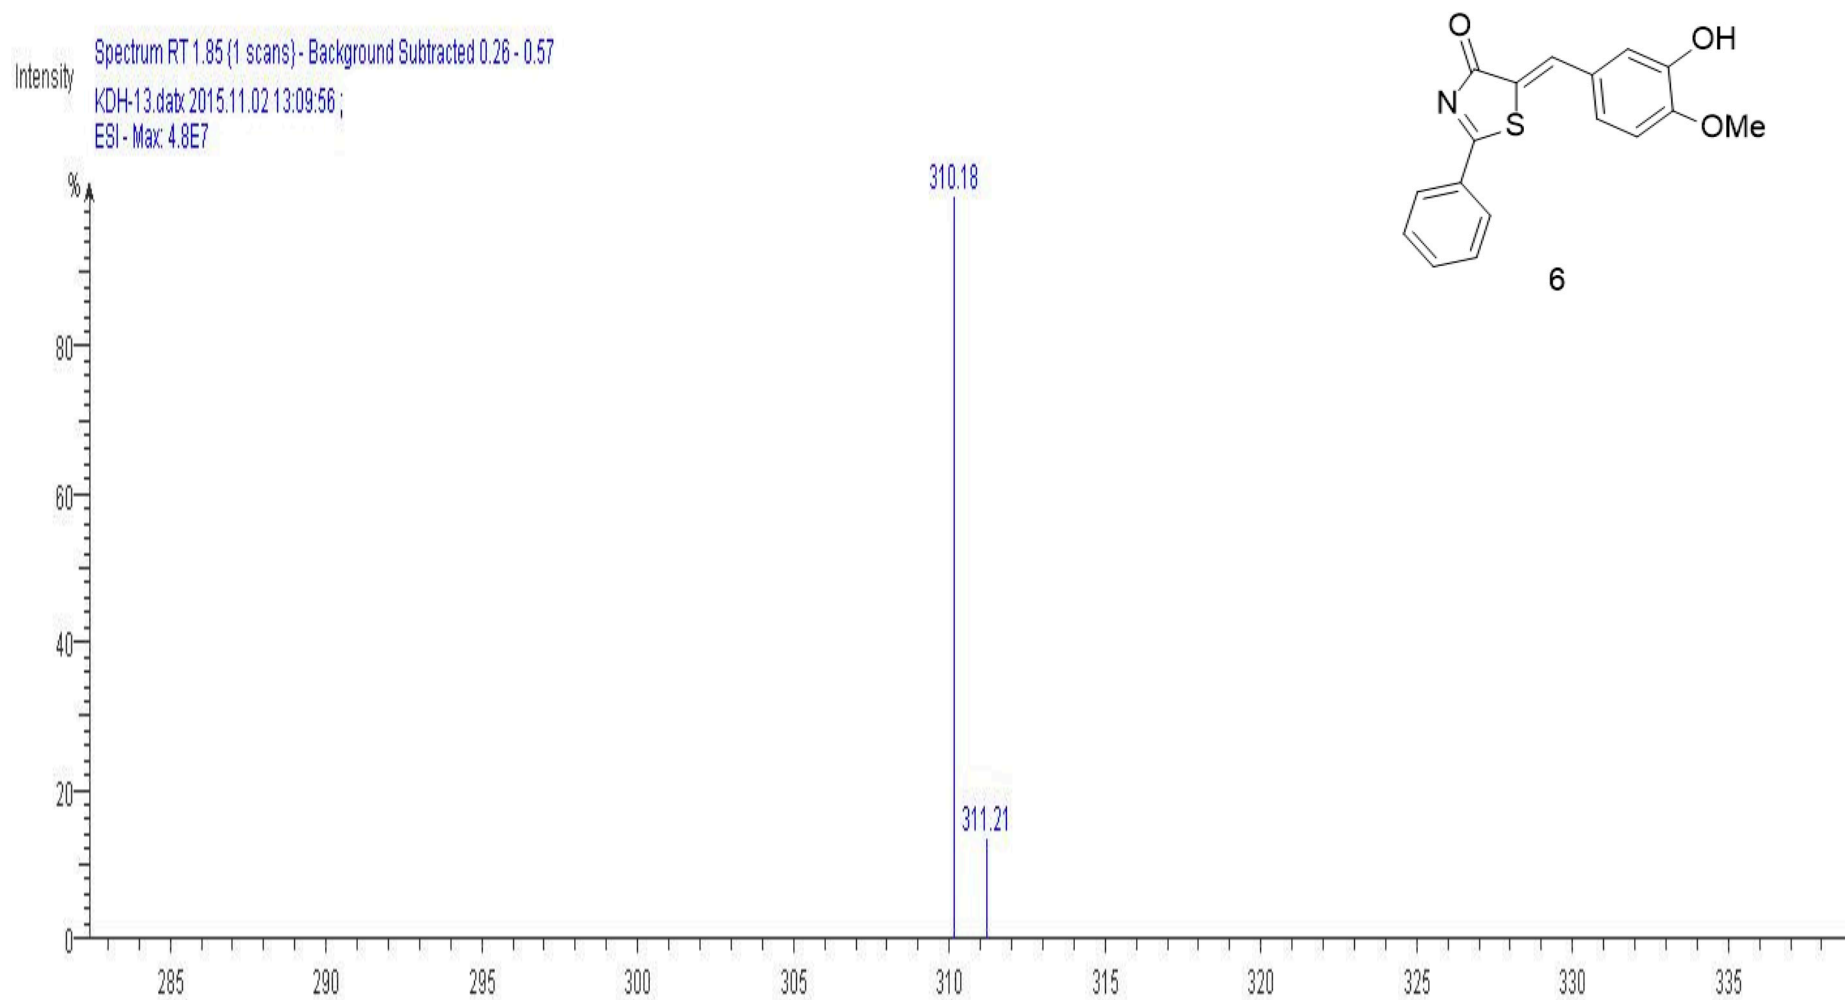

Figure S19. LRMS spectrum of compound **6**.

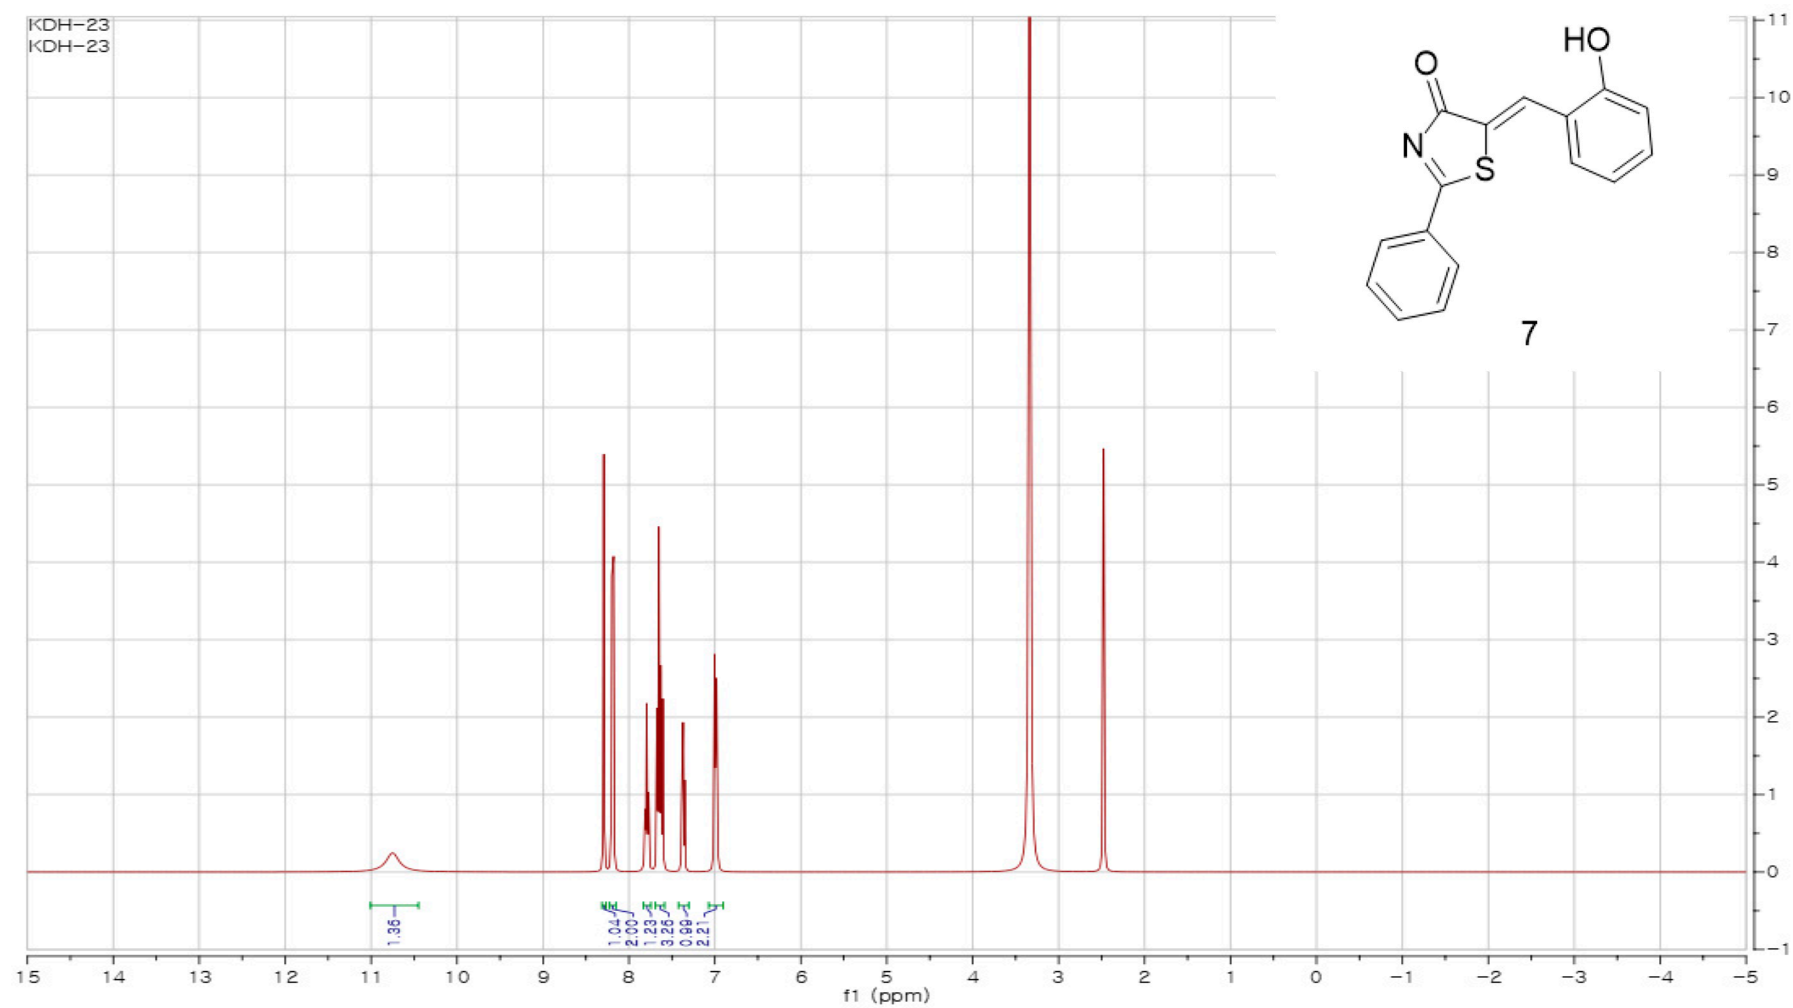

Figure S20.  $^1\text{H}$  NMR spectrum of compound 7.

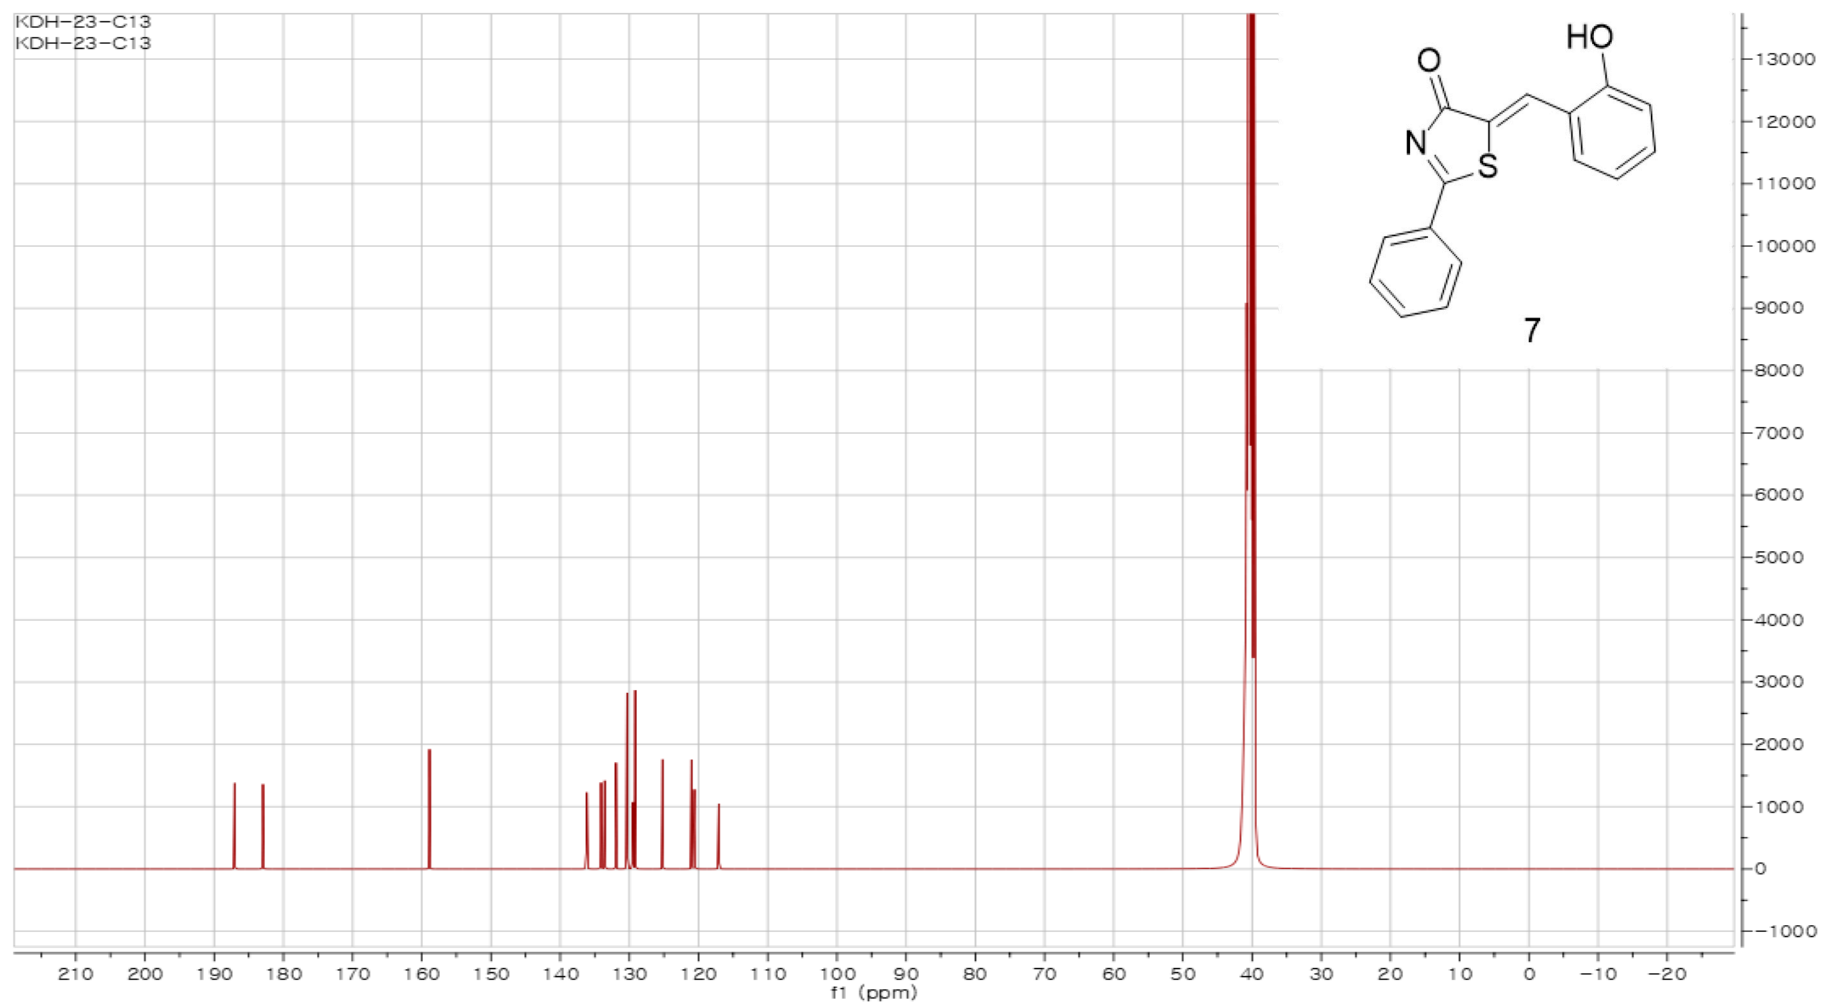

Figure S21.  $^{13}\text{C}$  NMR spectrum of compound 7.

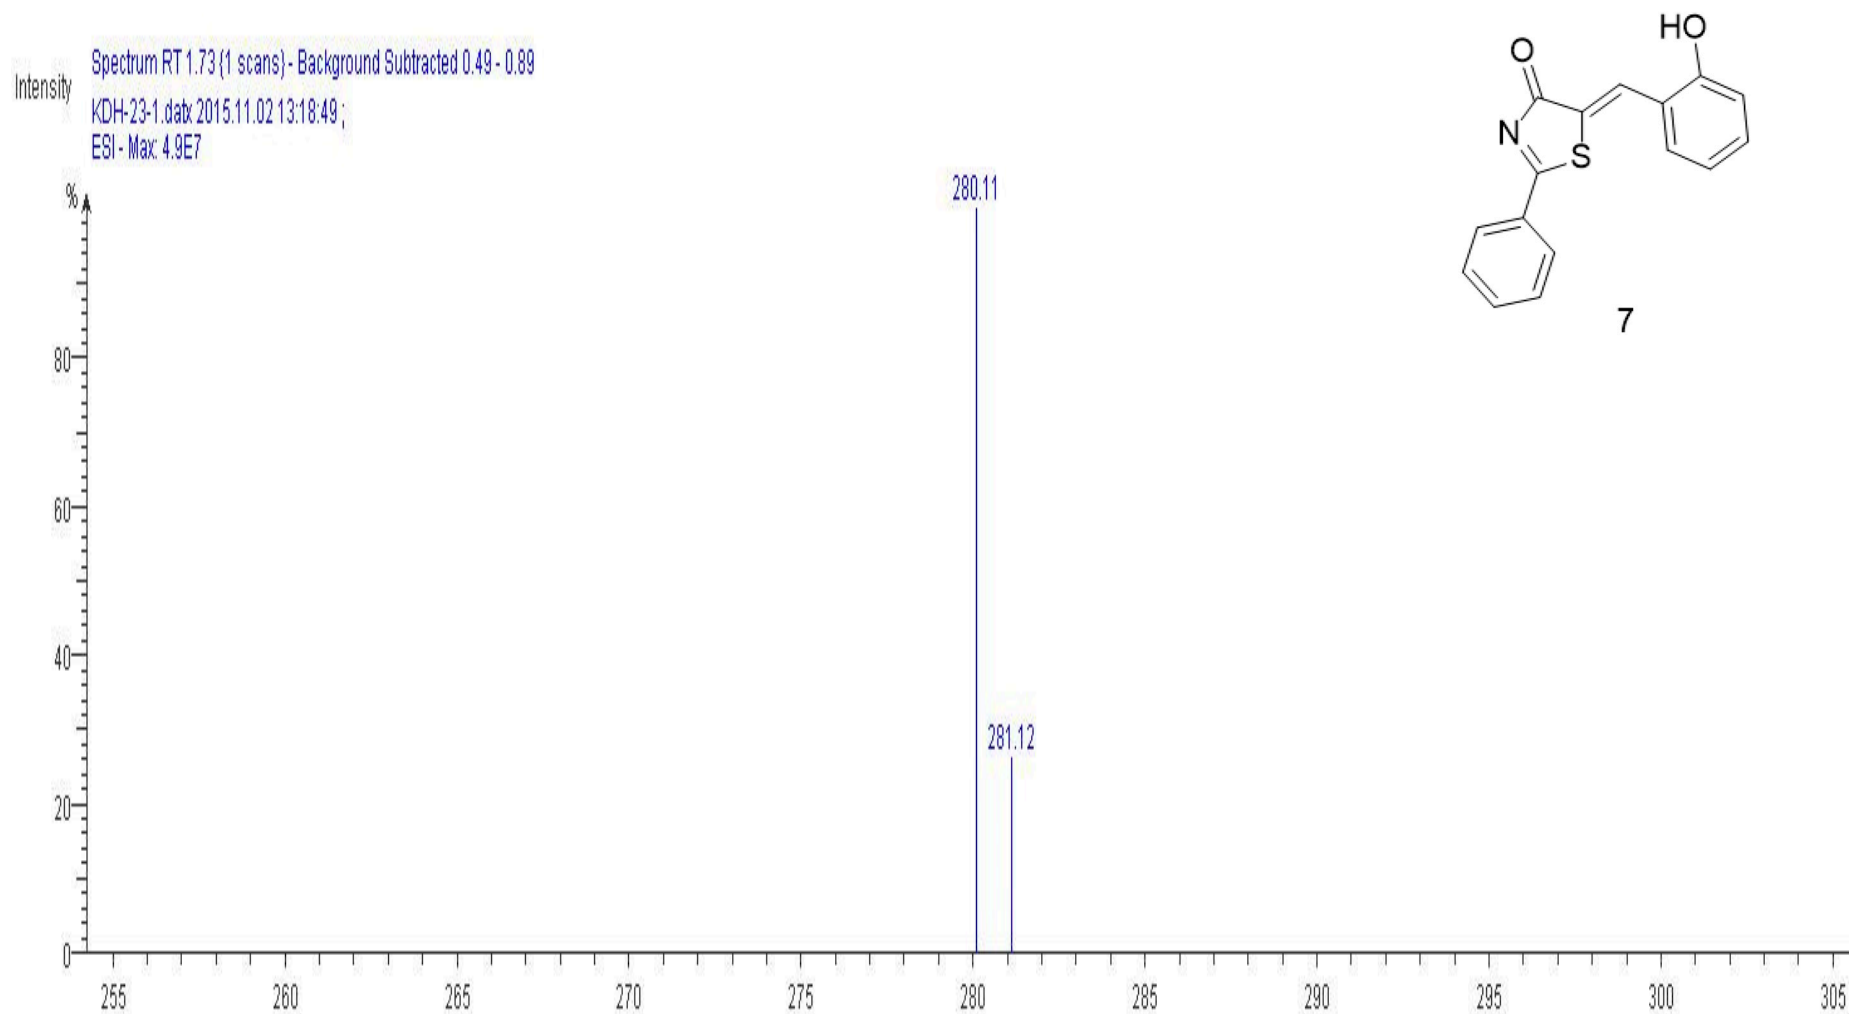

Figure S22. LRMS spectrum of compound 7.

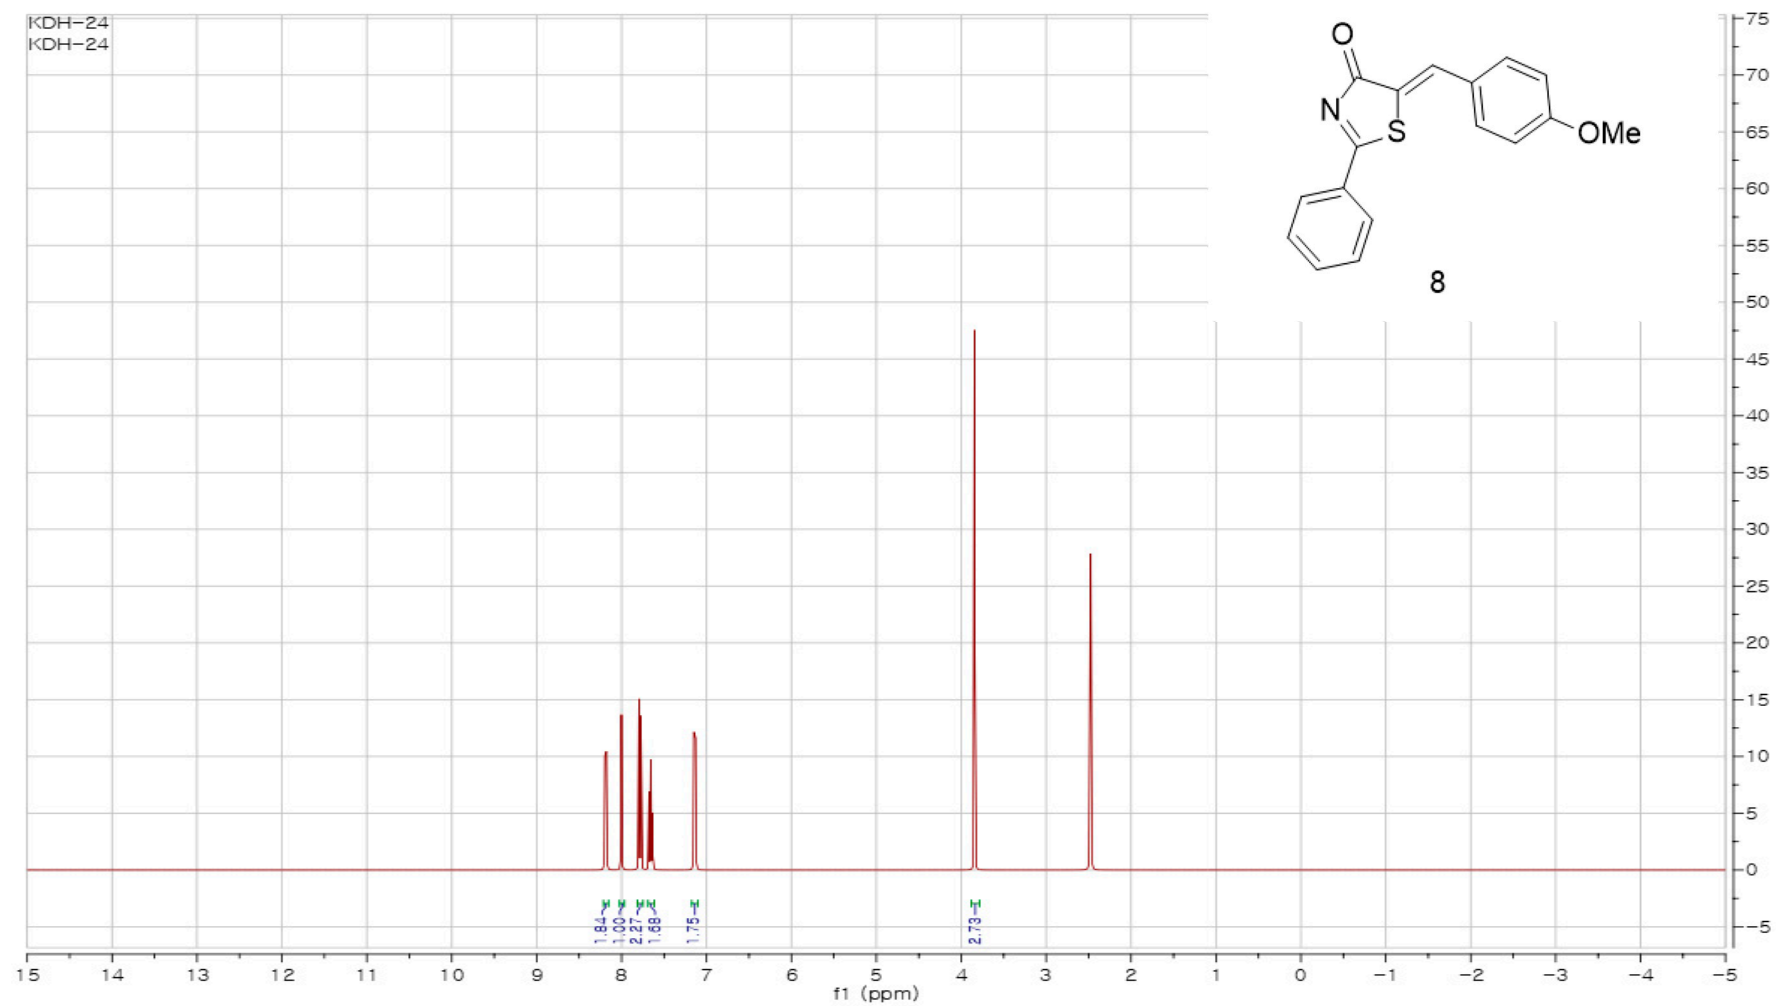

Figure S23.  $^1\text{H}$  NMR spectrum of compound **8**.

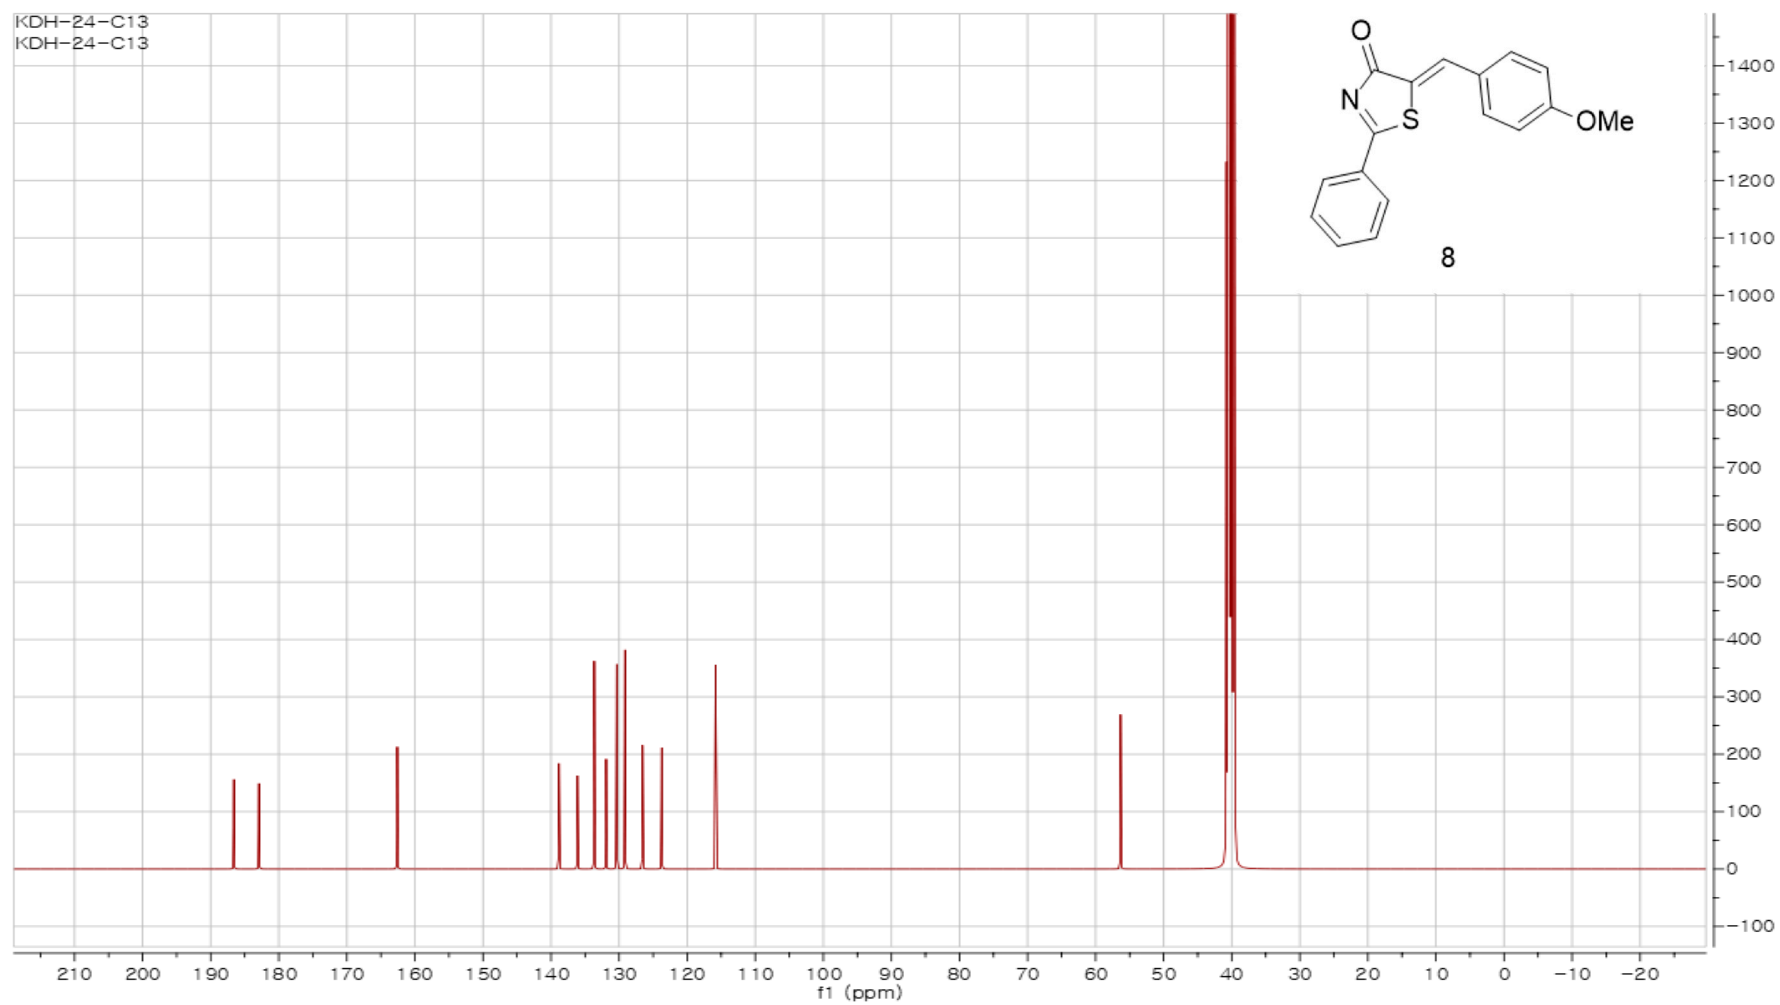

Figure S24.  $^{13}\text{C}$  NMR spectrum of compound **8**.

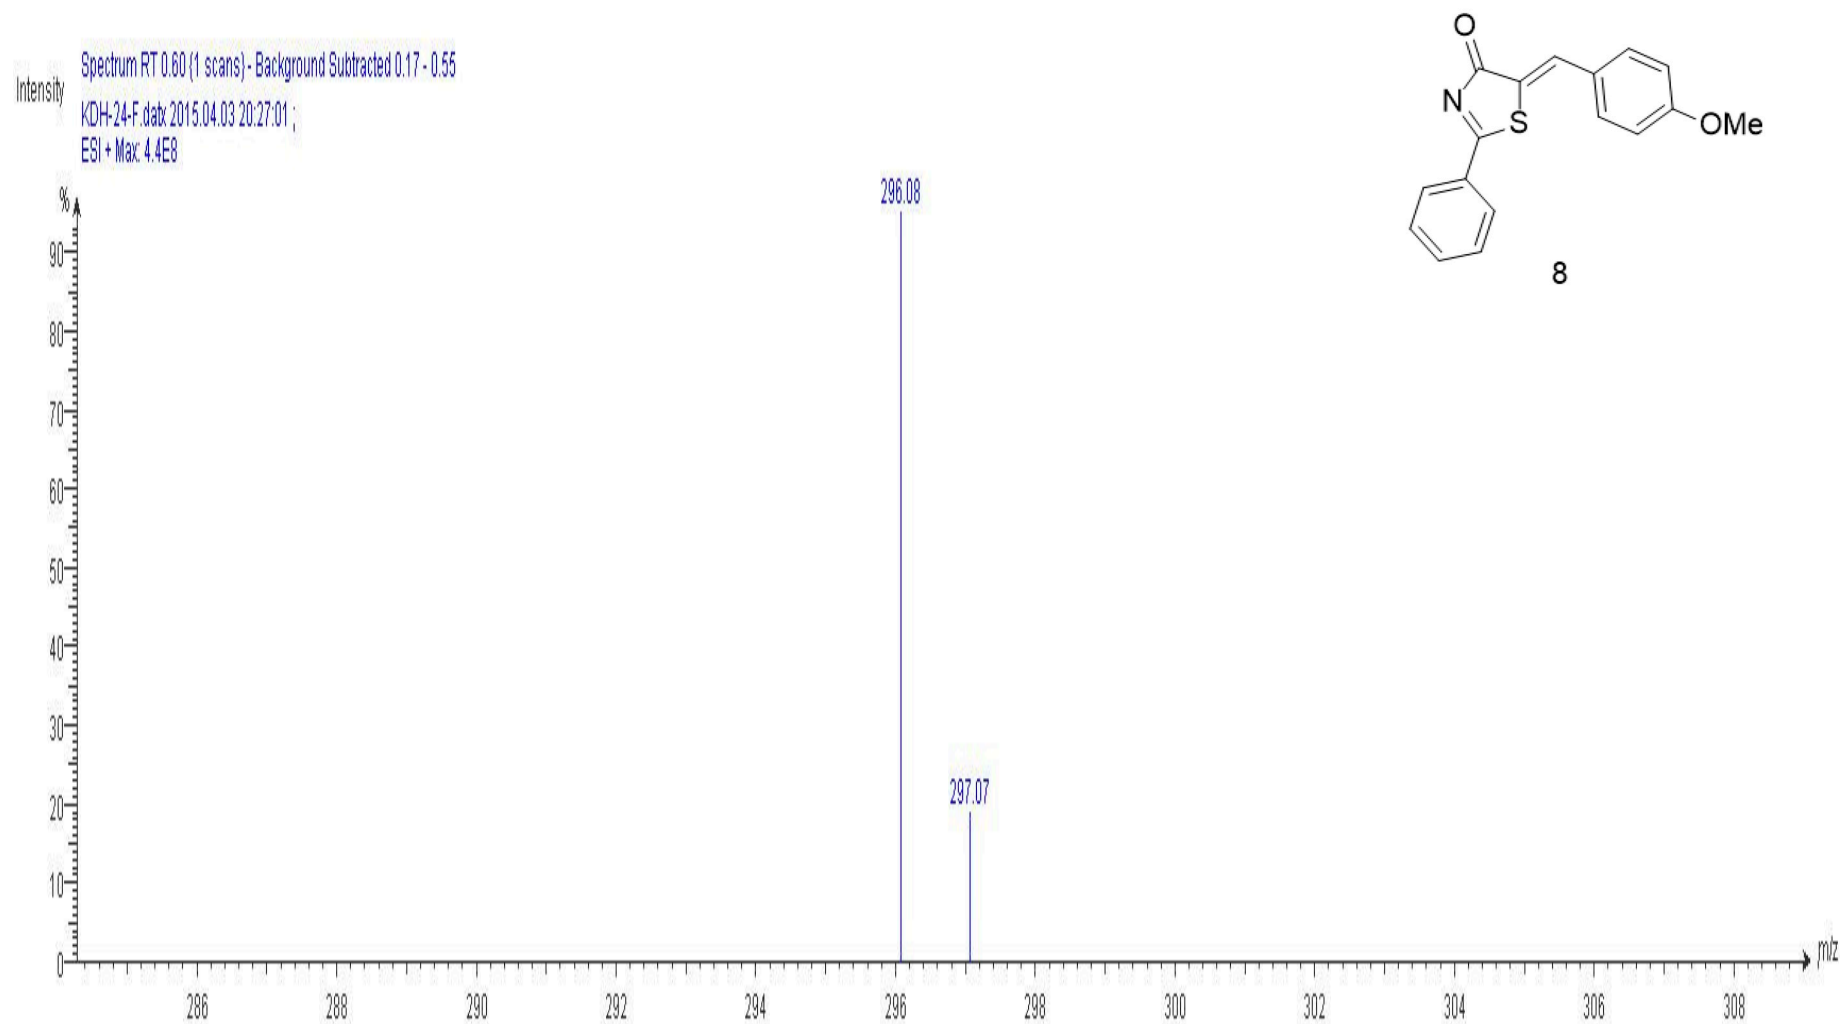

Figure S25. LRMS spectrum of compound **8**.

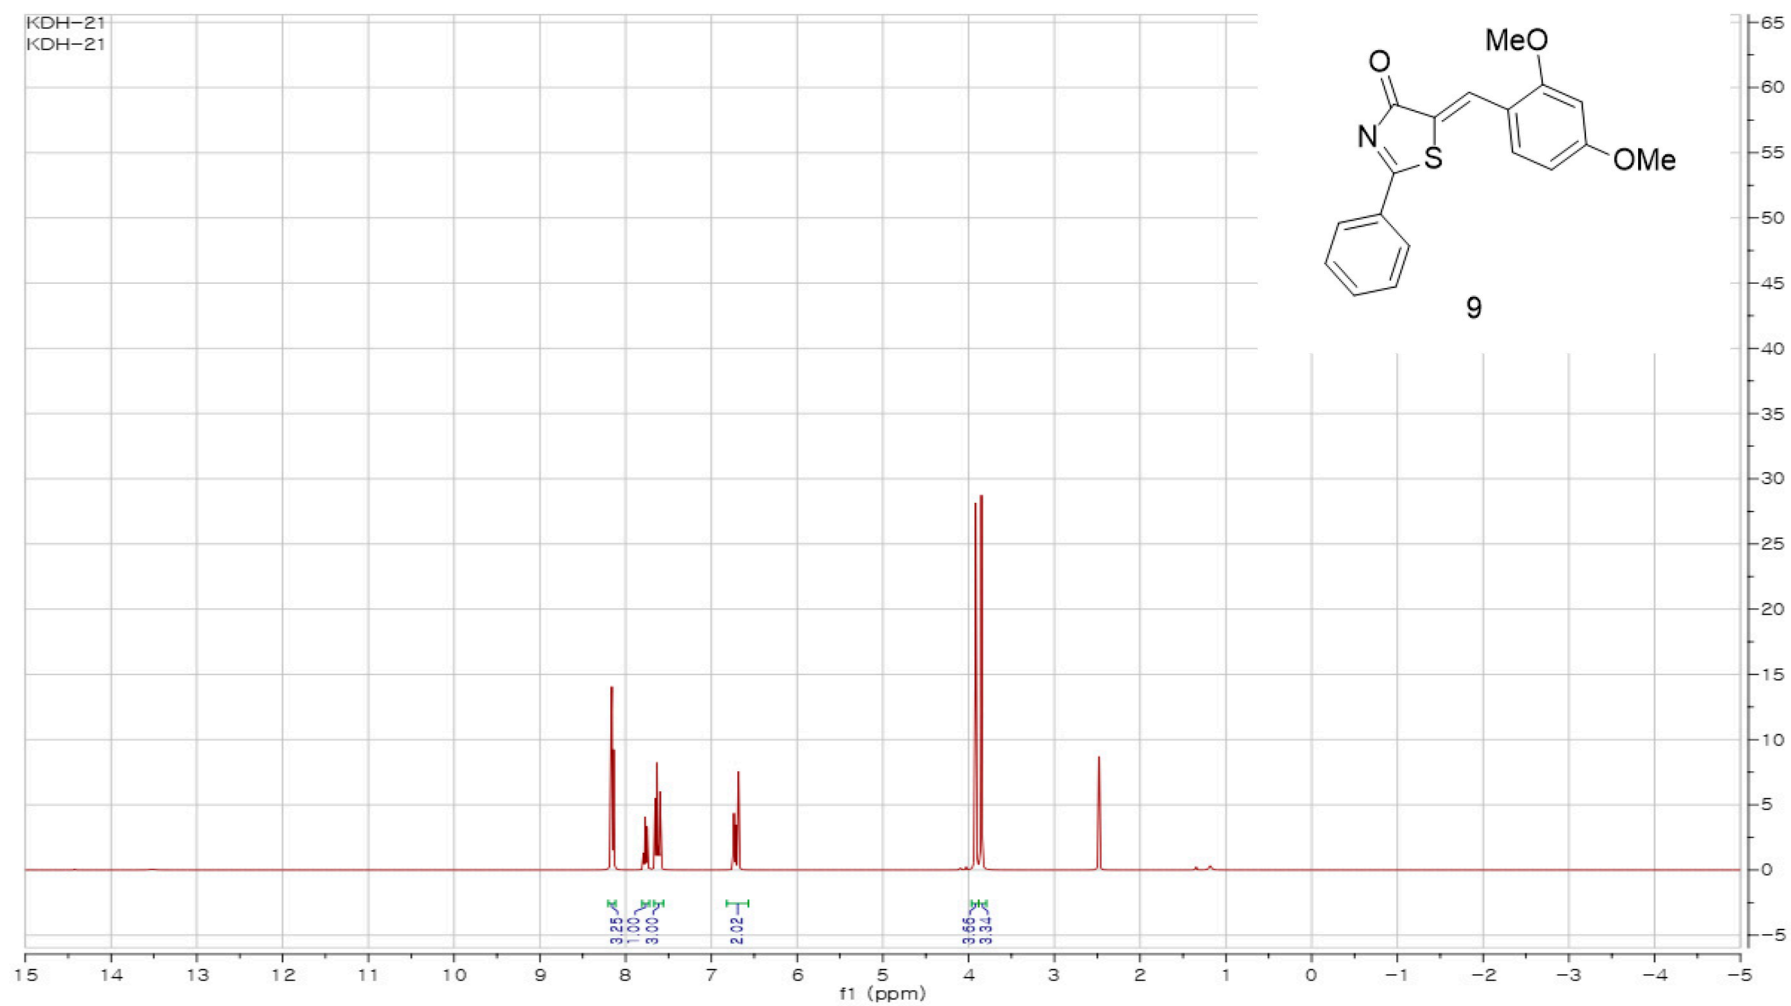

Figure S26.  $^1\text{H}$  NMR spectrum of compound 9.

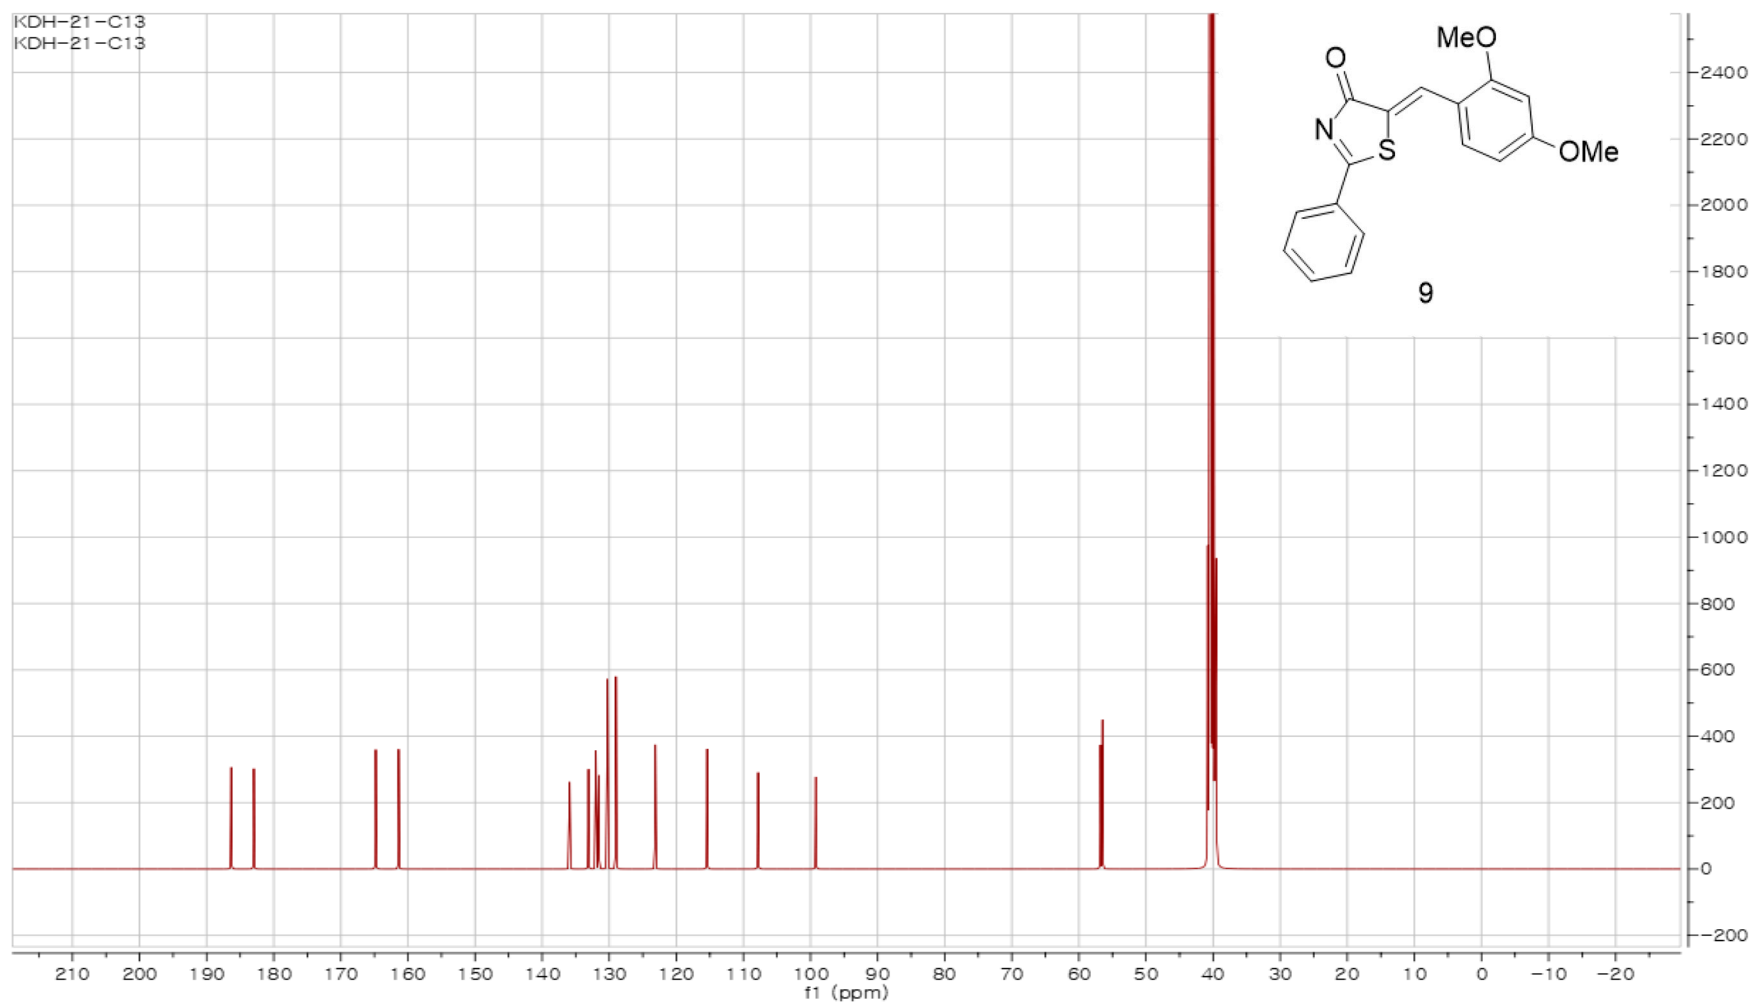

Figure S27.  $^{13}\text{C}$  NMR spectrum of compound **9**.

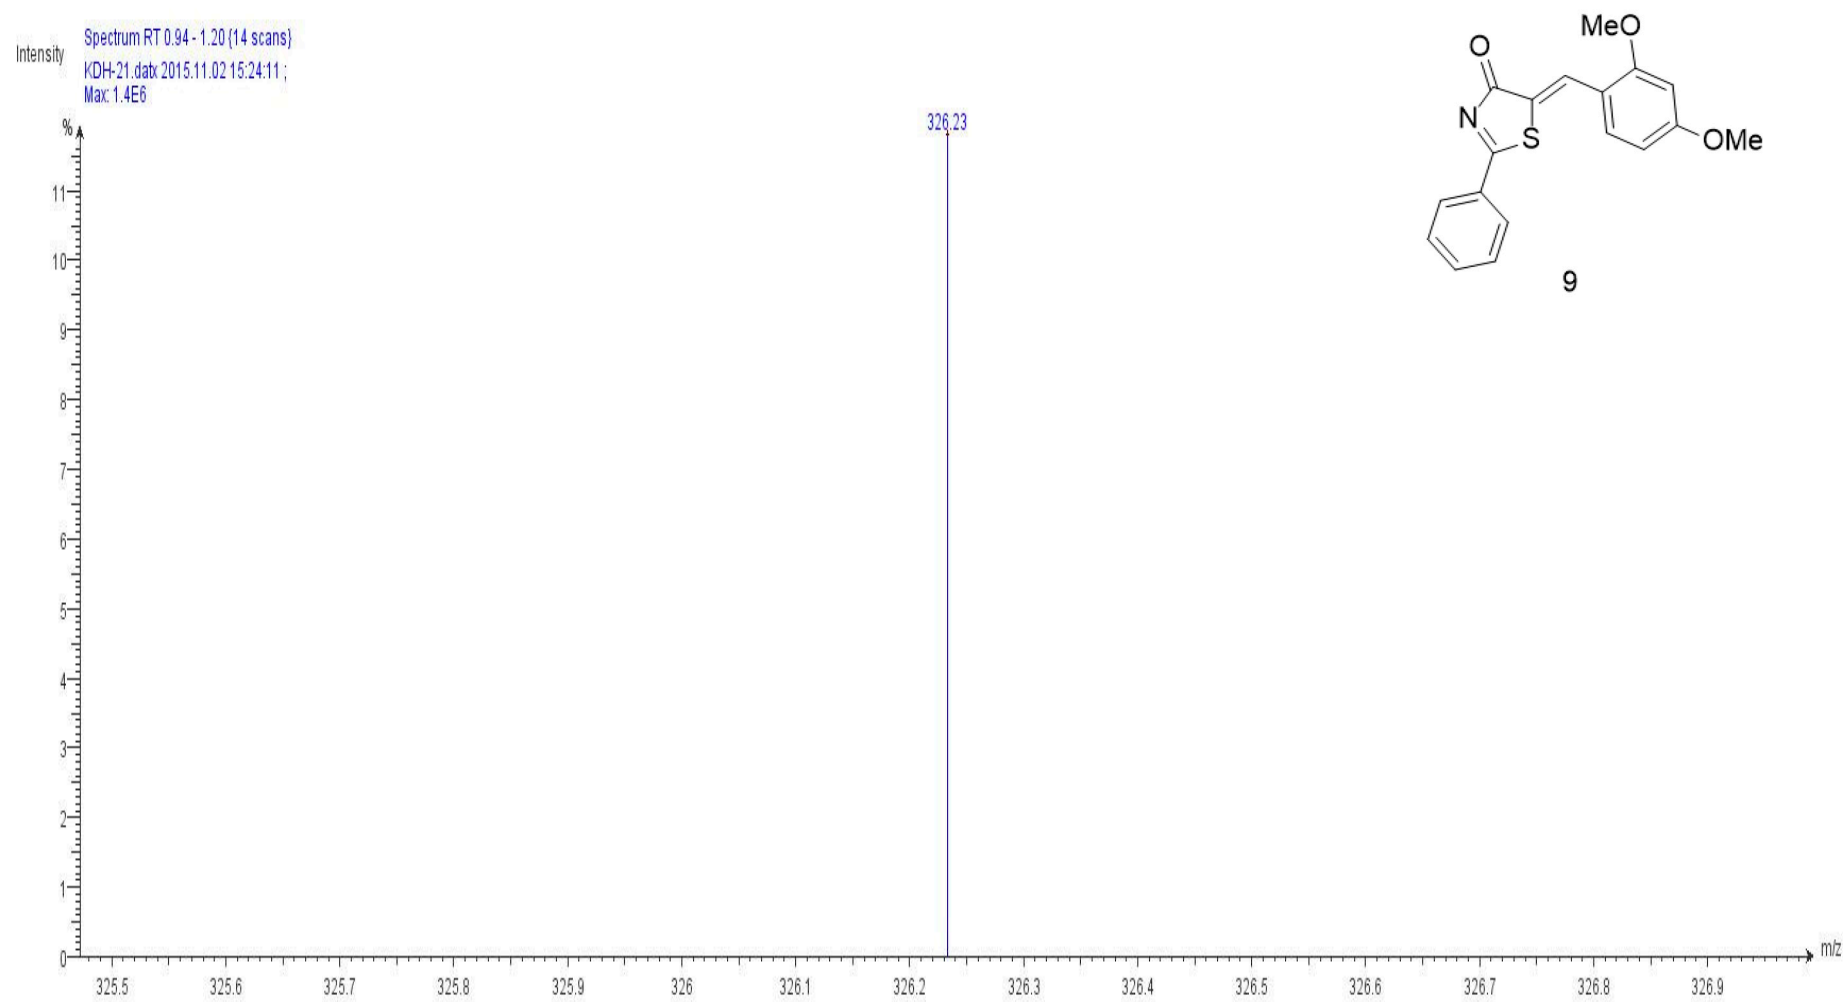

Figure S28. LRMS spectrum of compound **9**.

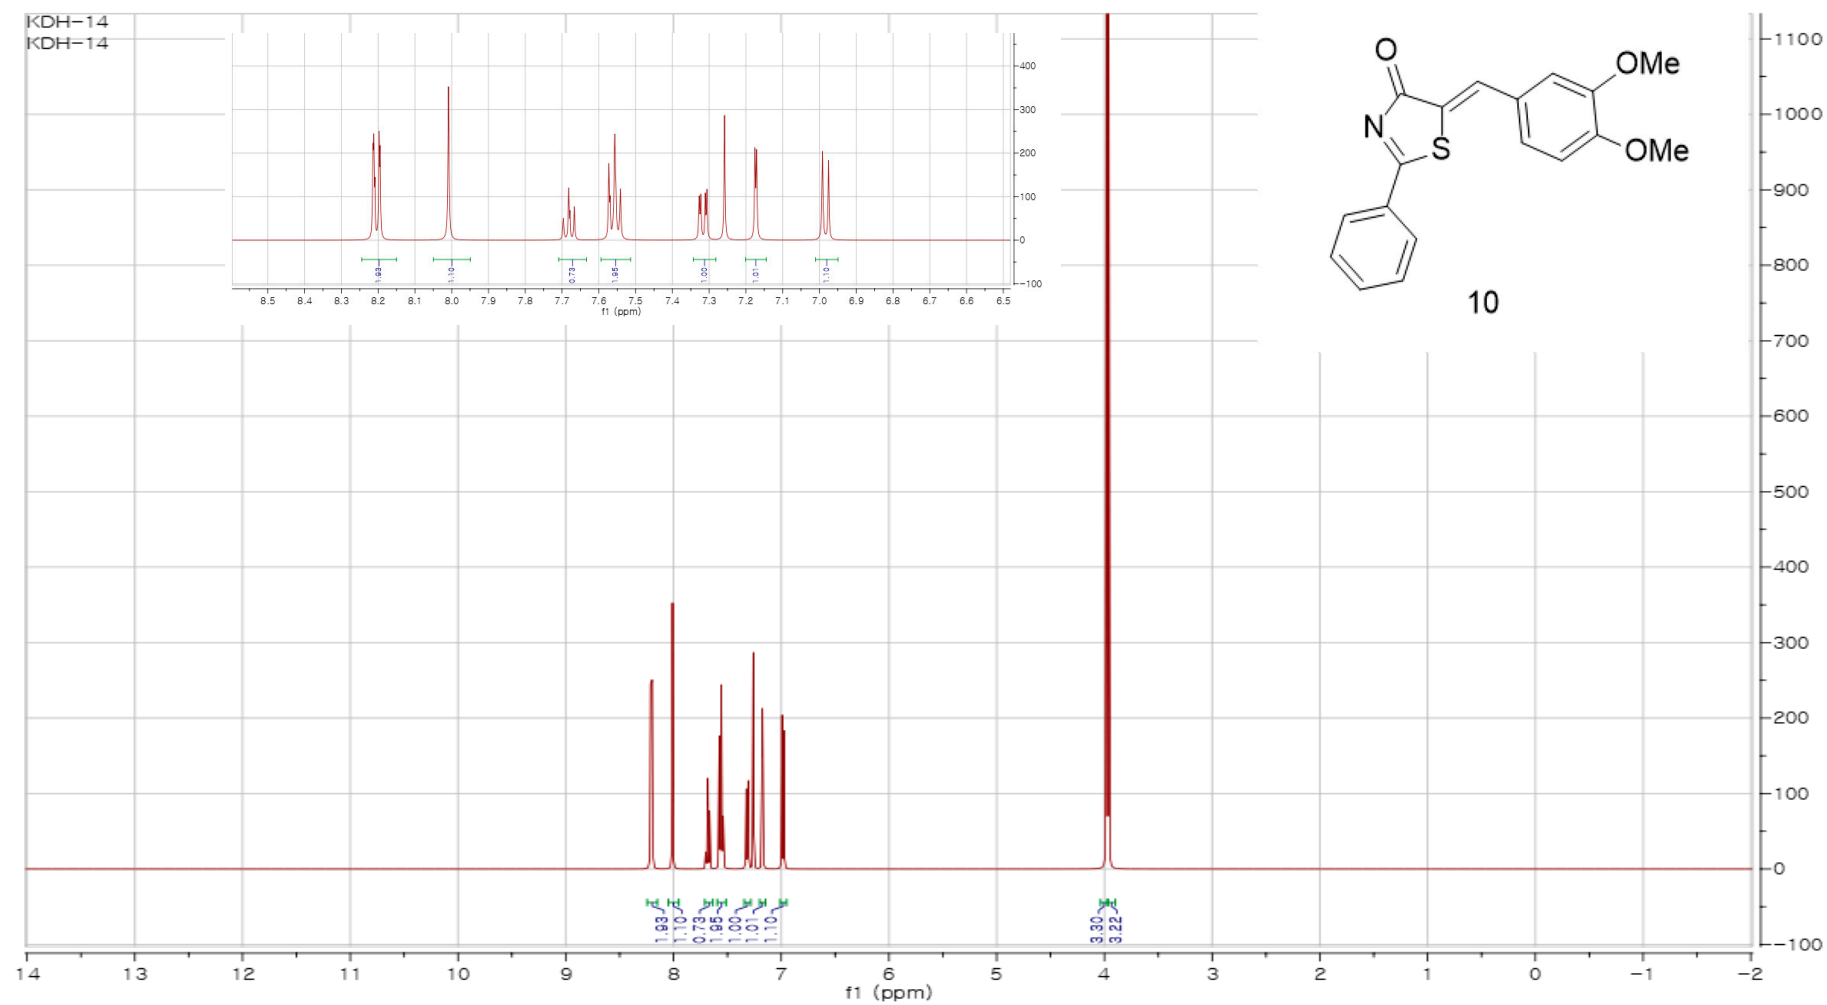

Figure S29.  $^1\text{H}$  NMR spectrum of compound **10**.

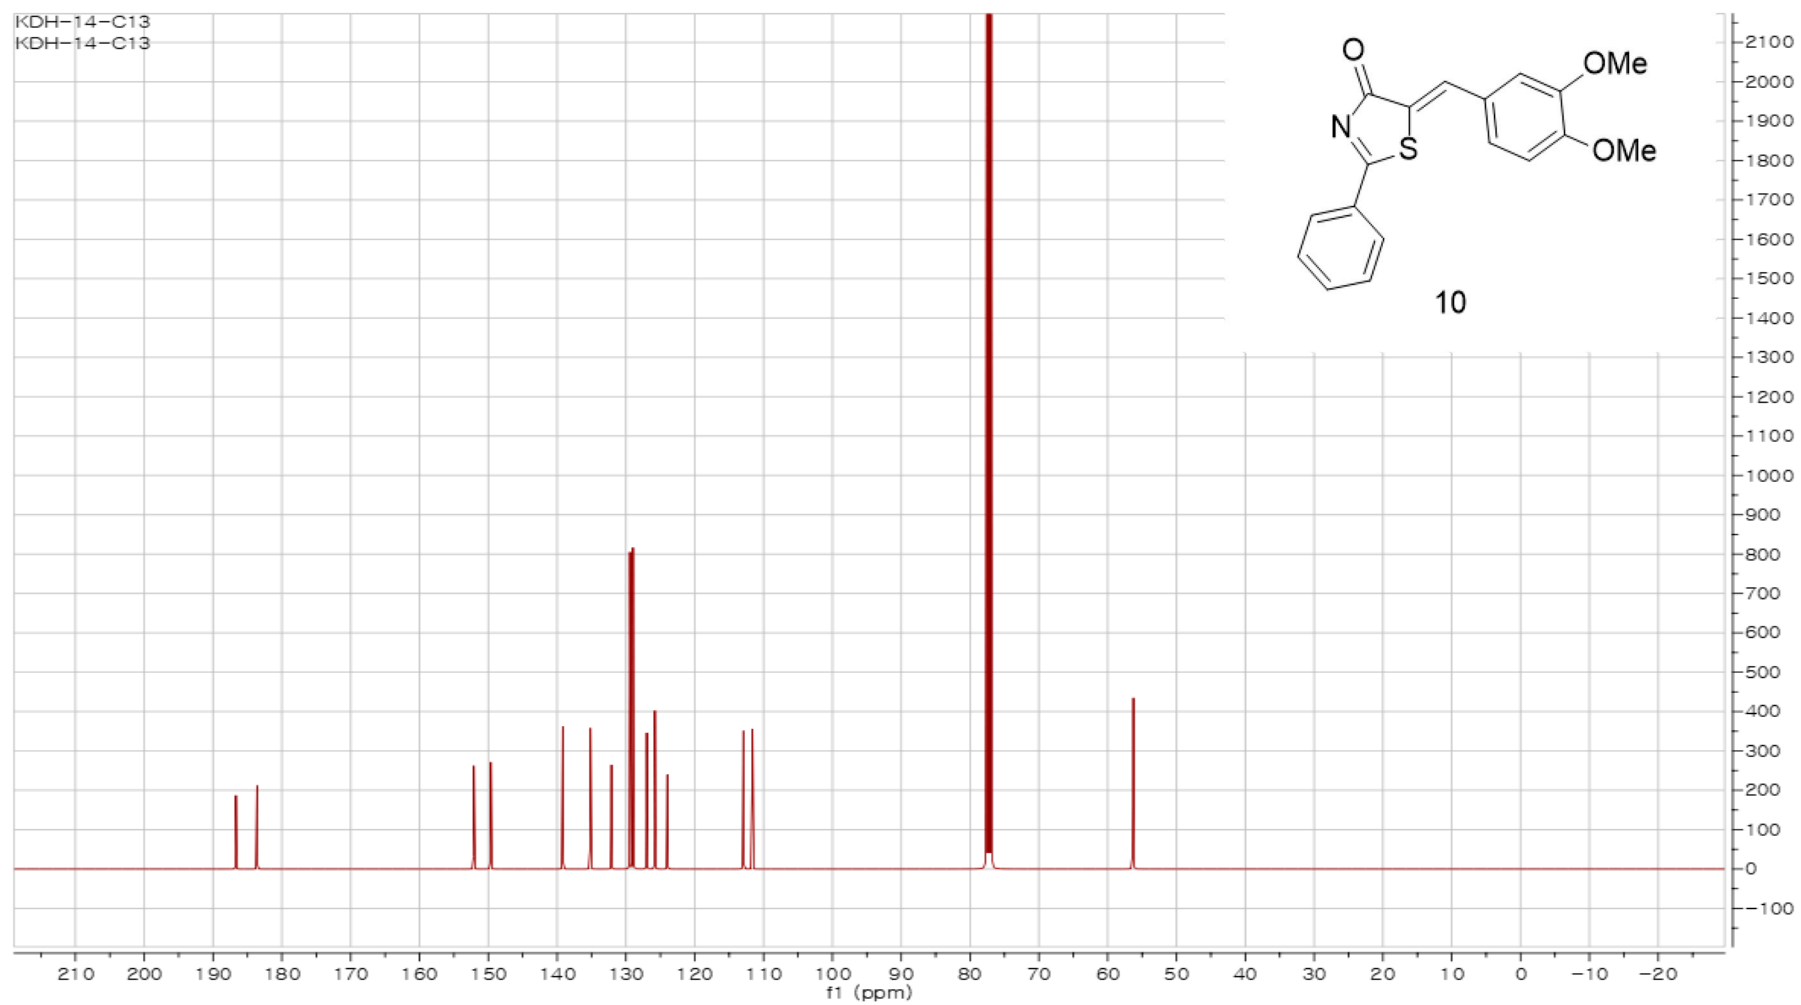

Figure S30.  $^{13}\text{C}$  NMR spectrum of compound **10**.

Spectrum RT 2.37 (1 scans) - Background Subtracted 1.62 - 2.22  
KDH-14-1.datx 2015.11.02 15:20:40;  
ESI + Max: 8.8E7

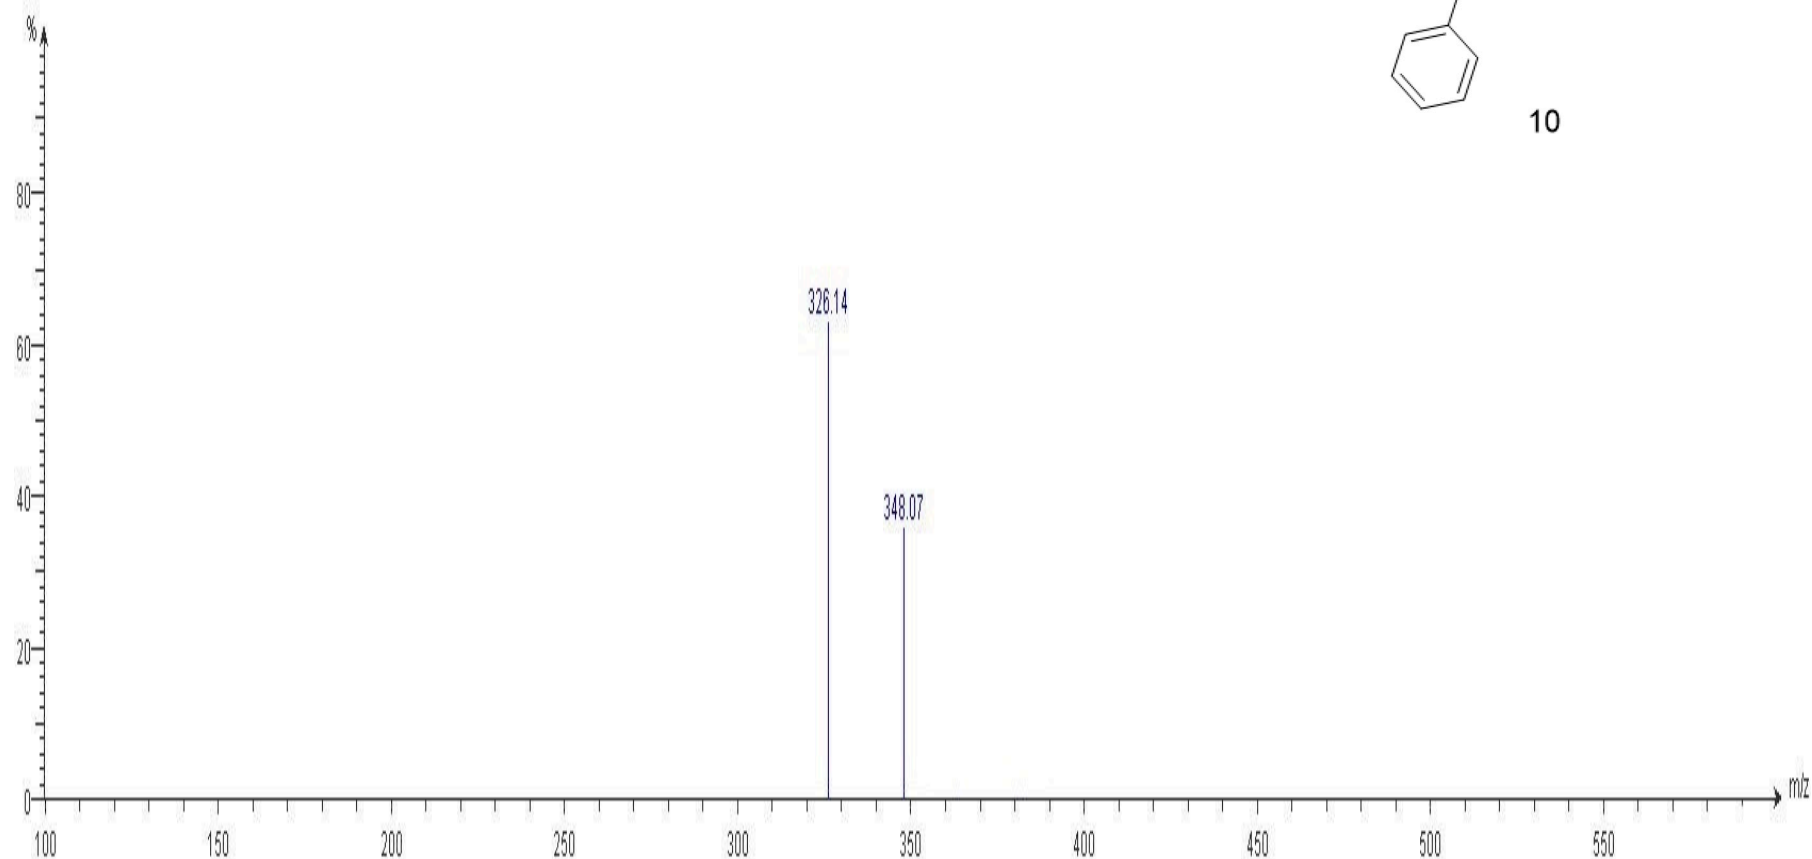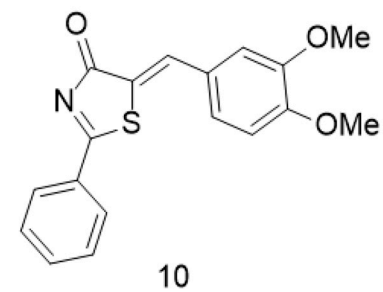

Figure S31. LRMS spectrum of compound **10**.

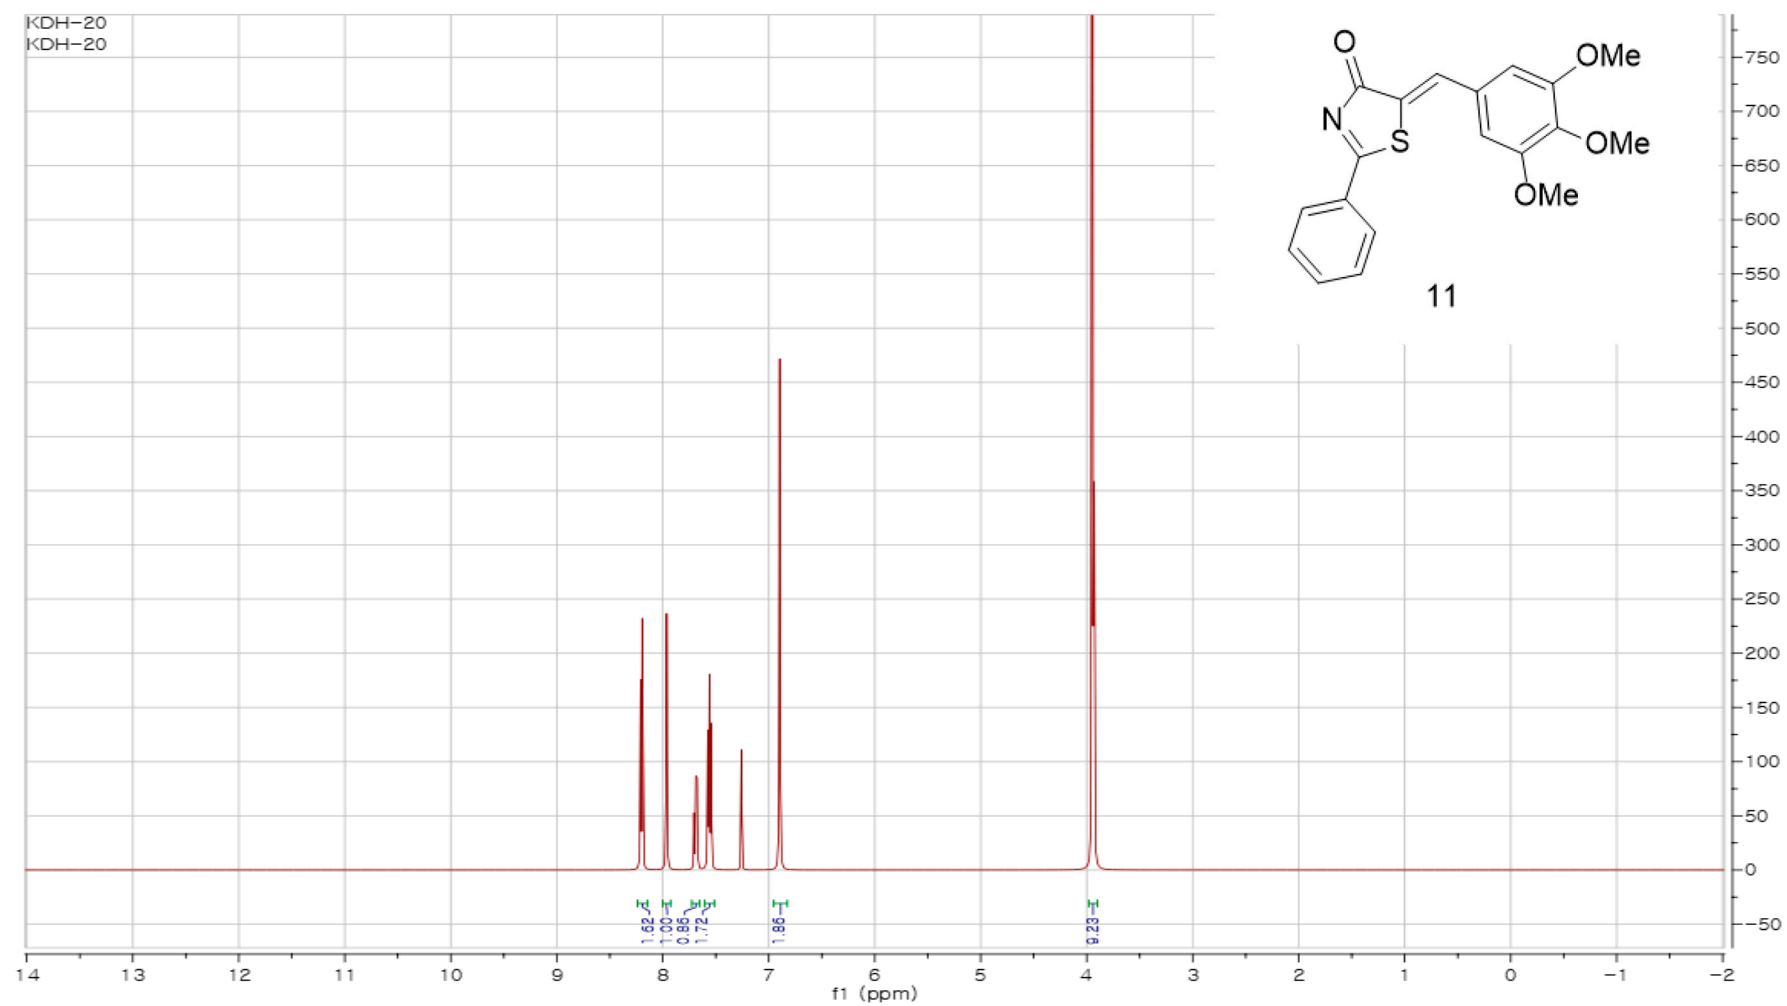

Figure S32.  $^1\text{H}$  NMR spectrum of compound **11**.

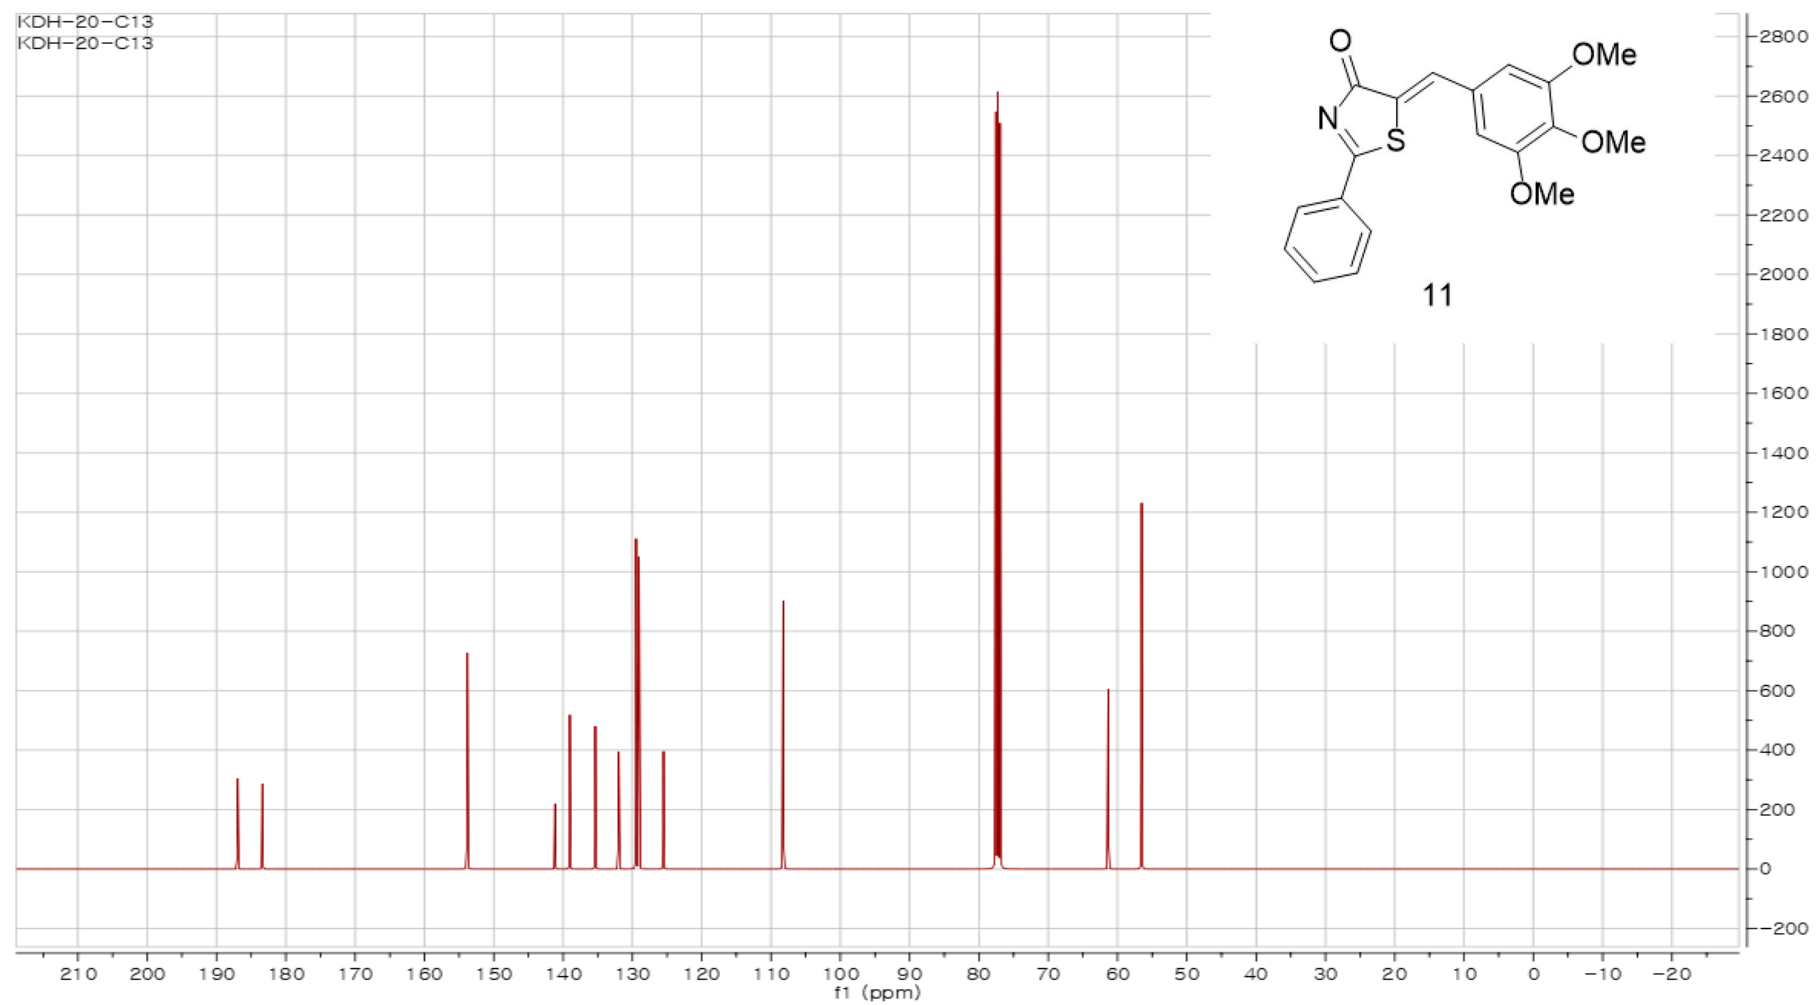

Figure S33.  $^{13}\text{C}$  NMR spectrum of compound **11**.

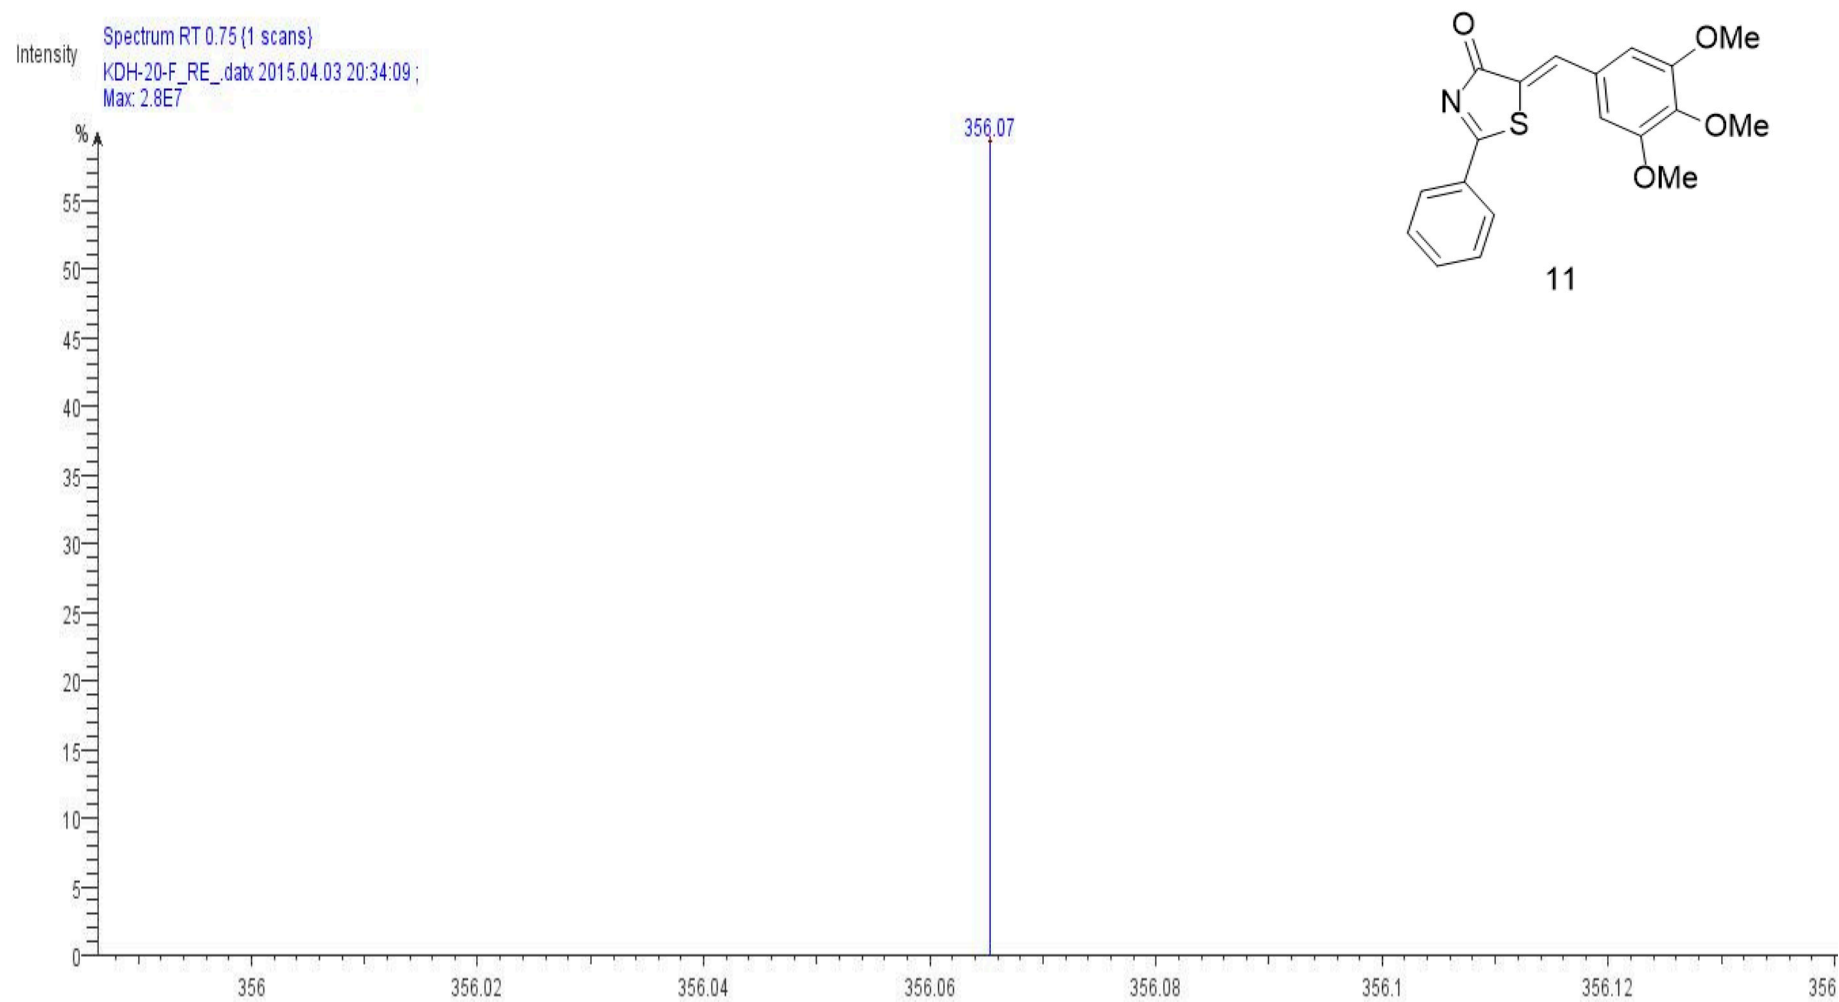

Figure S34. LRMS spectrum of compound **11**.

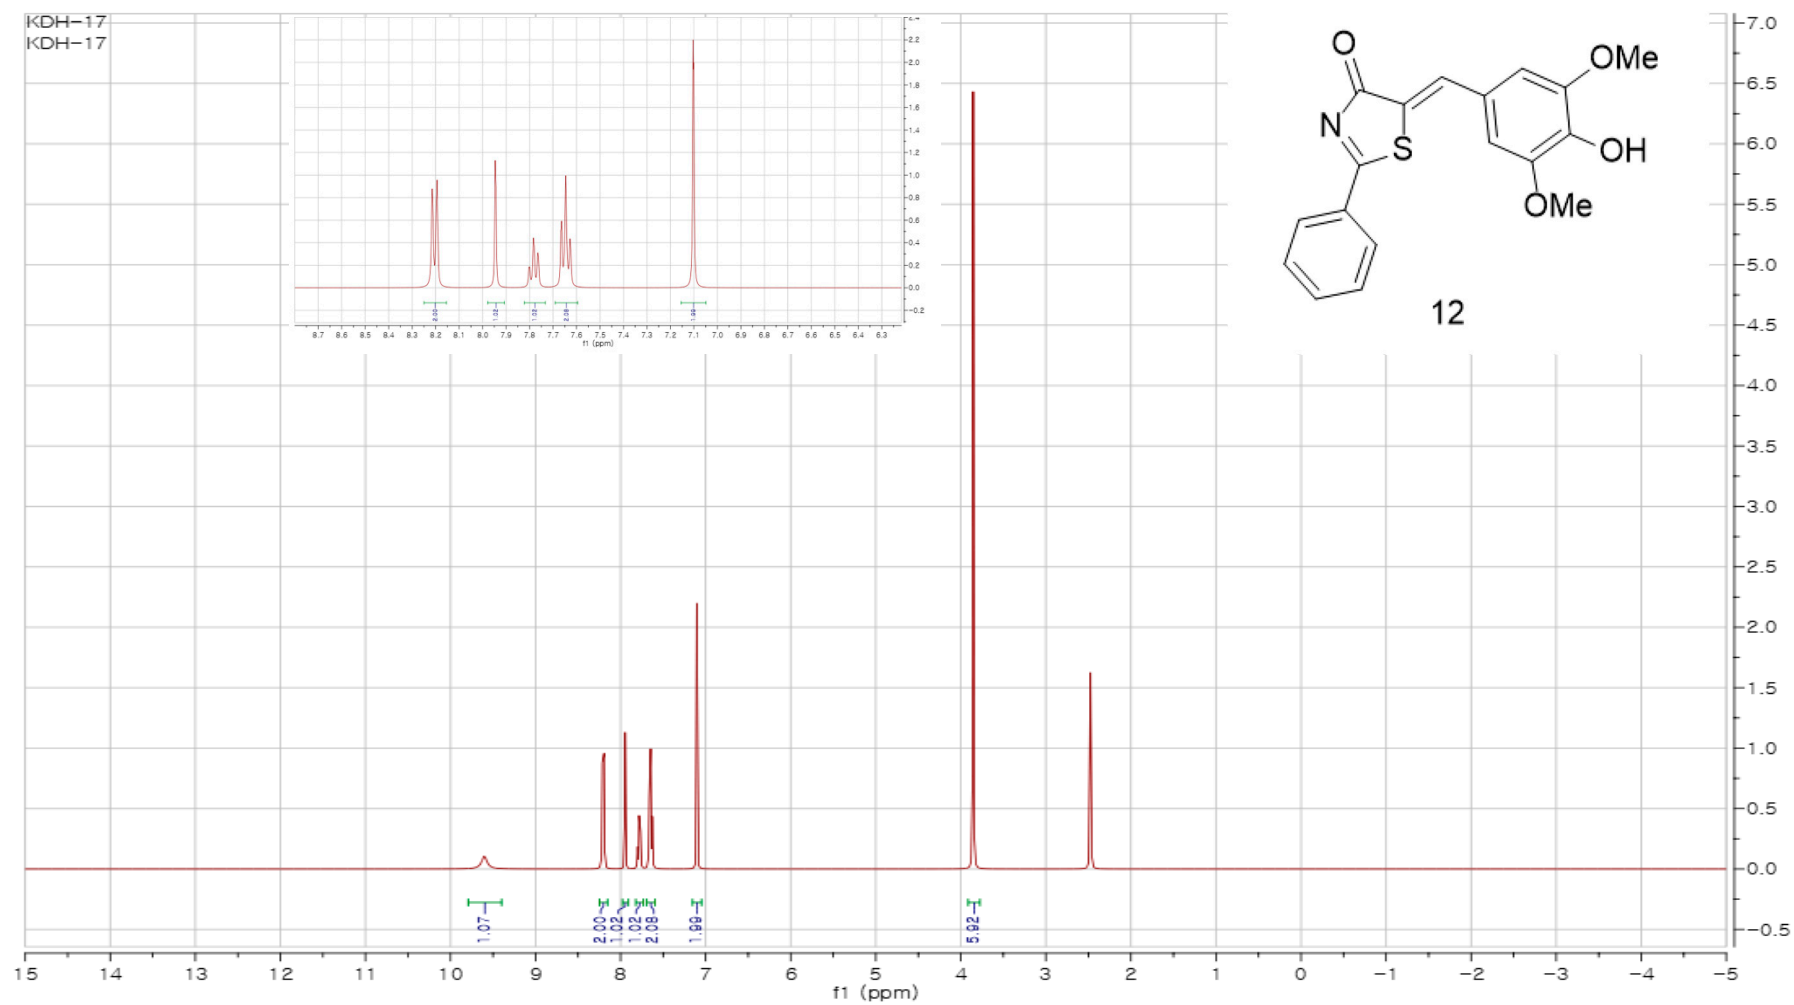

Figure S35.  $^1\text{H}$  NMR spectrum of compound **12**.

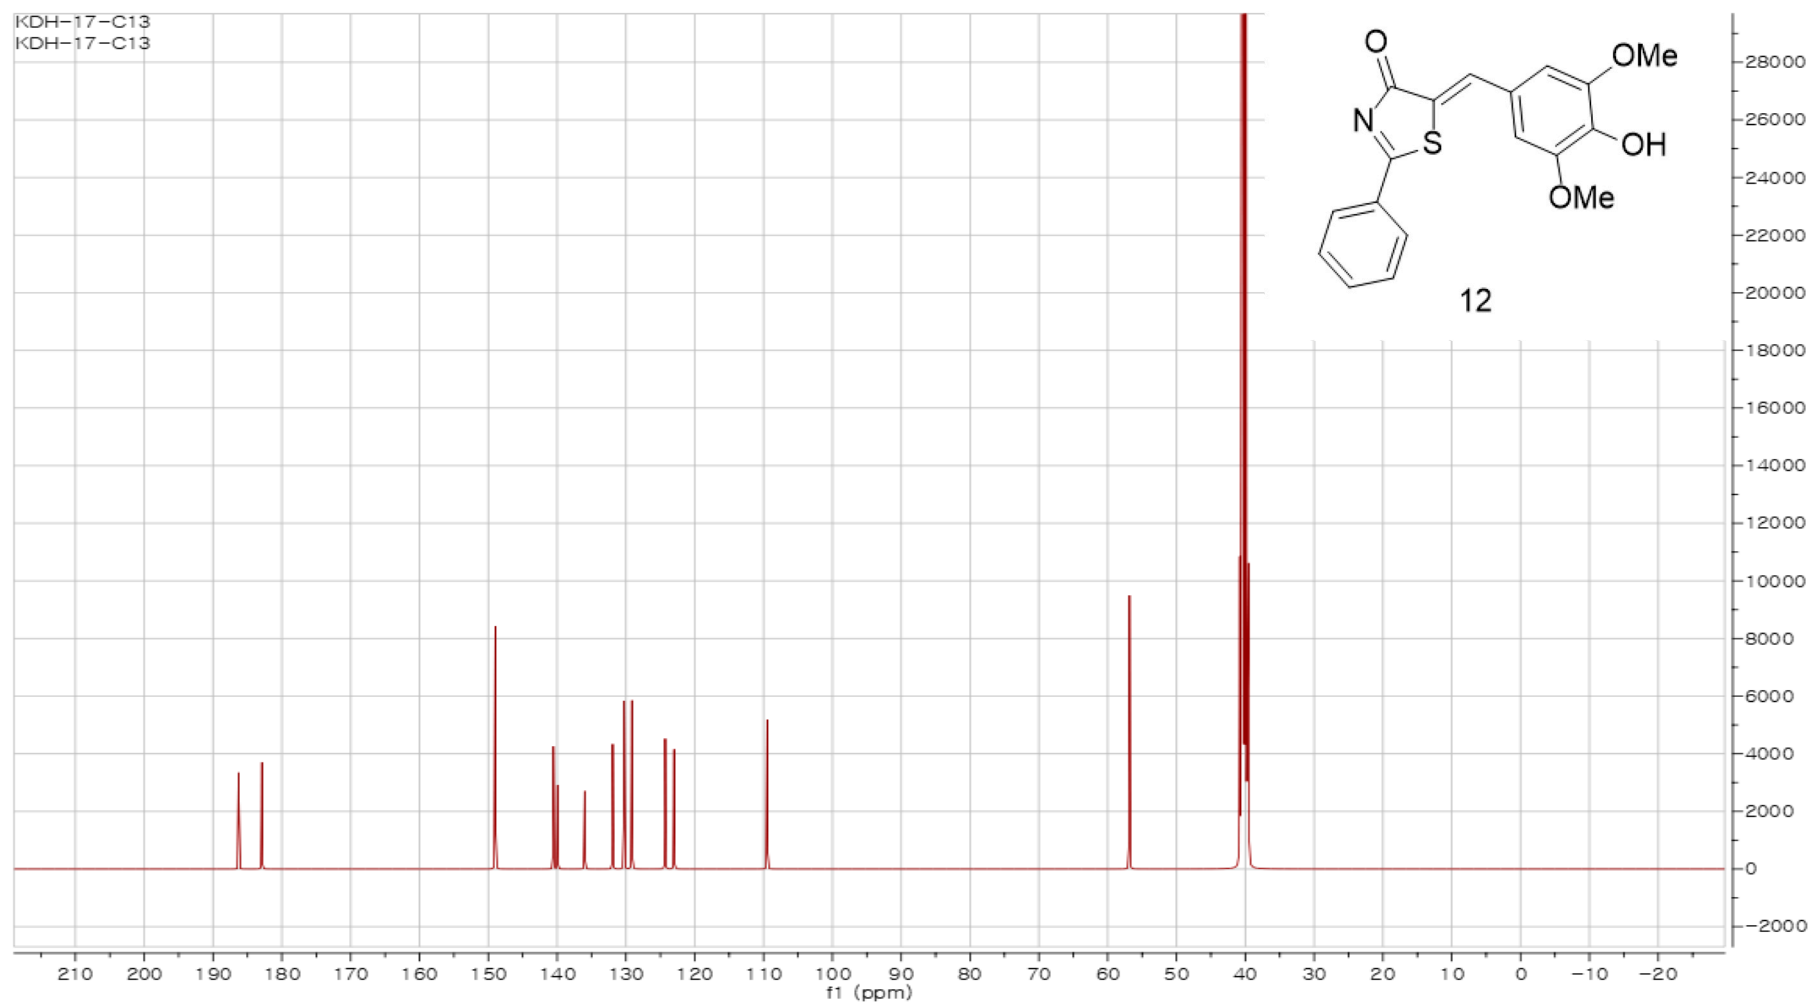

Figure S36.  $^{13}\text{C}$  NMR spectrum of compound **12**.

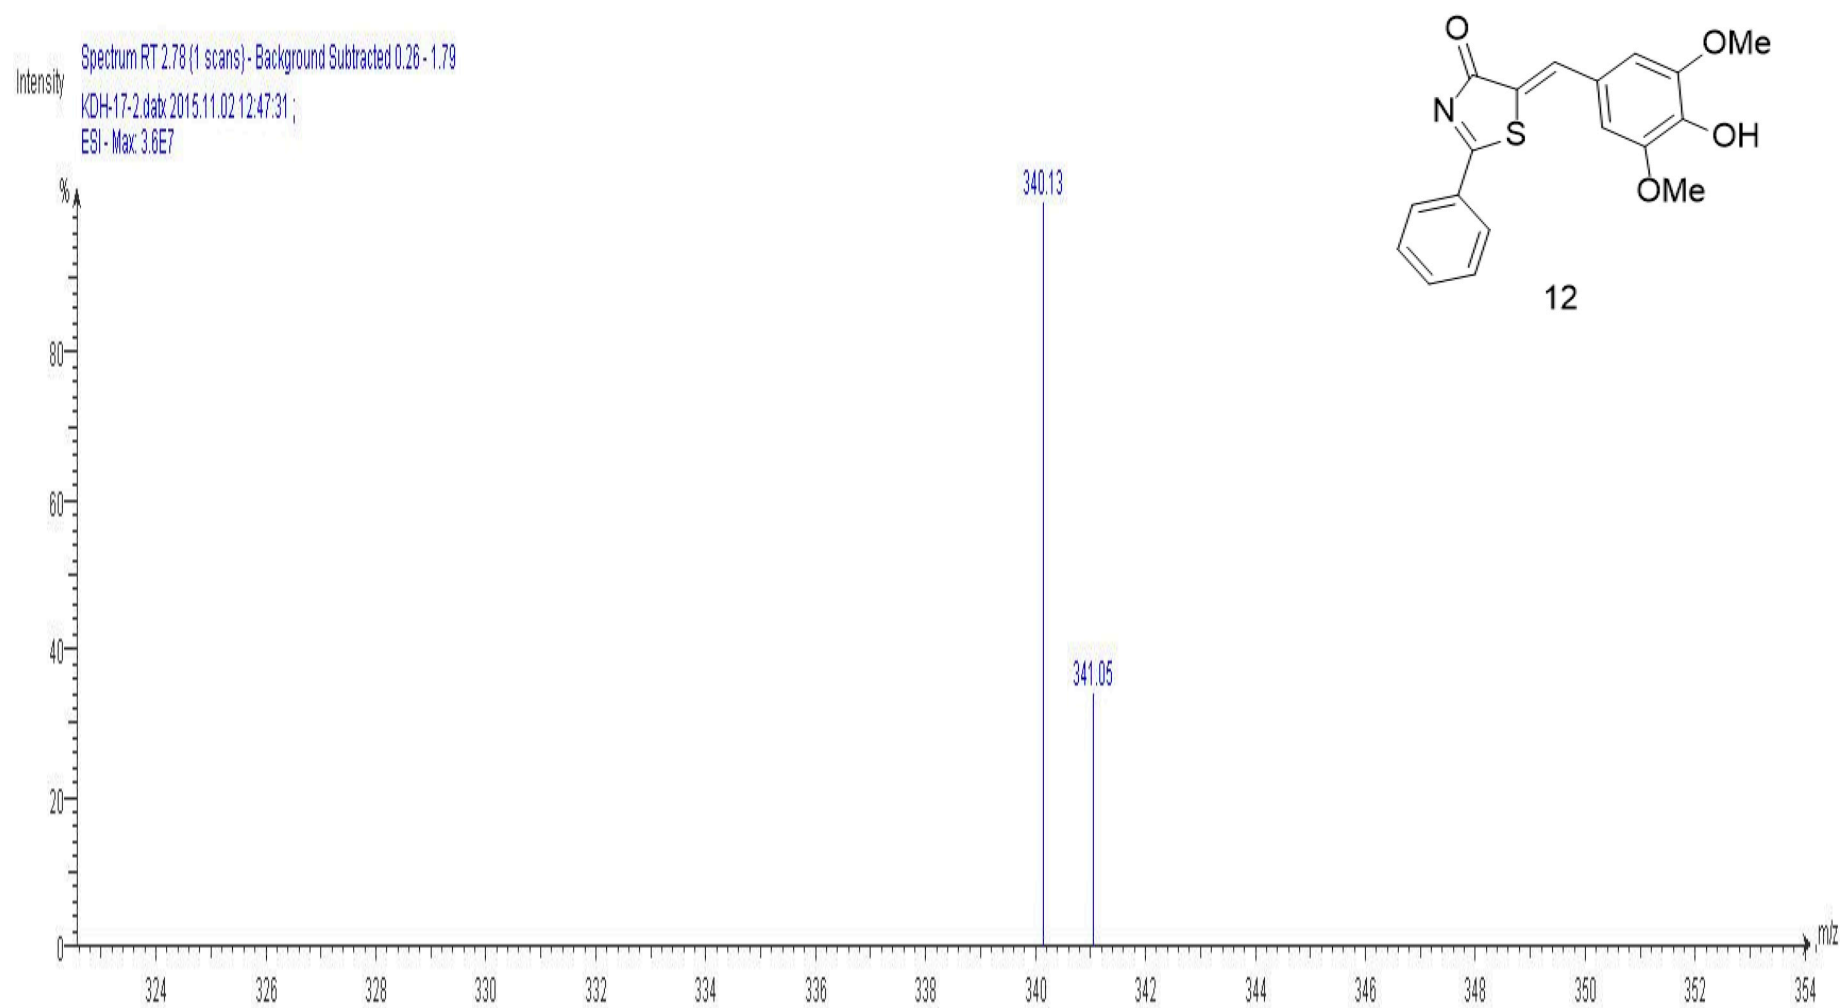

Figure S37. LRMS spectrum of compound **12**.

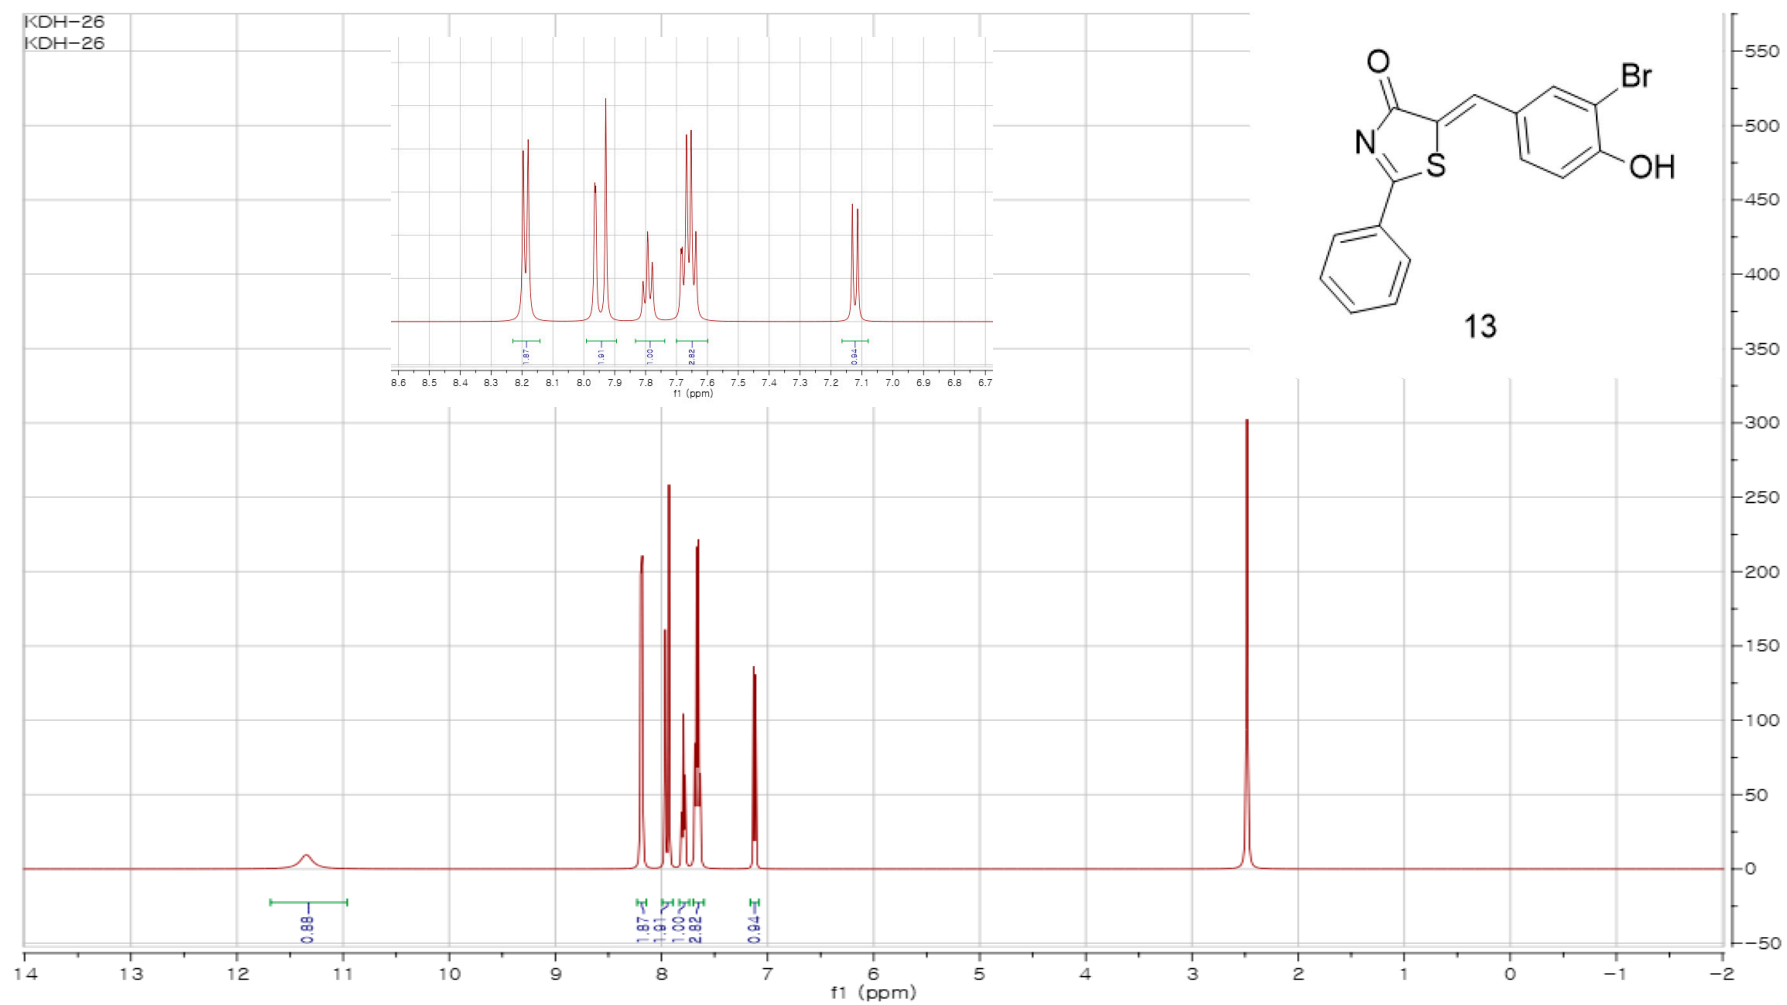

Figure S38.  $^1\text{H}$  NMR spectrum of compound **13**.

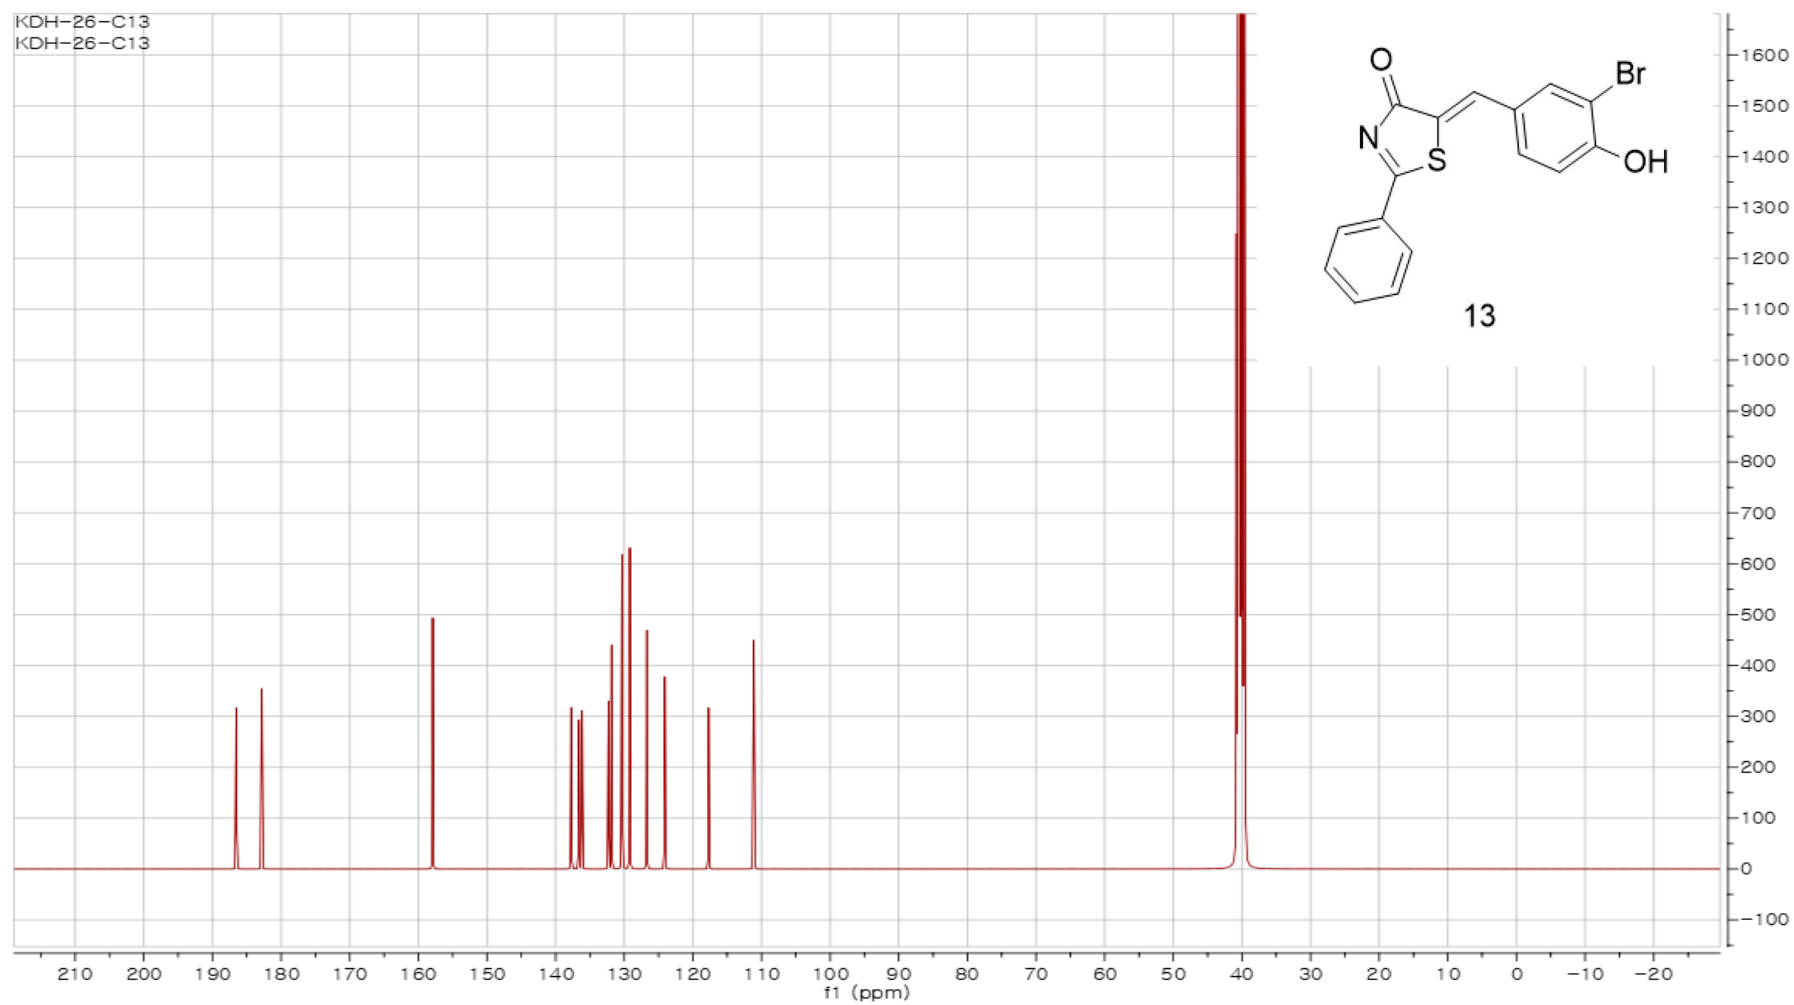

Figure S39.  $^{13}\text{C}$  NMR spectrum of compound **13**.

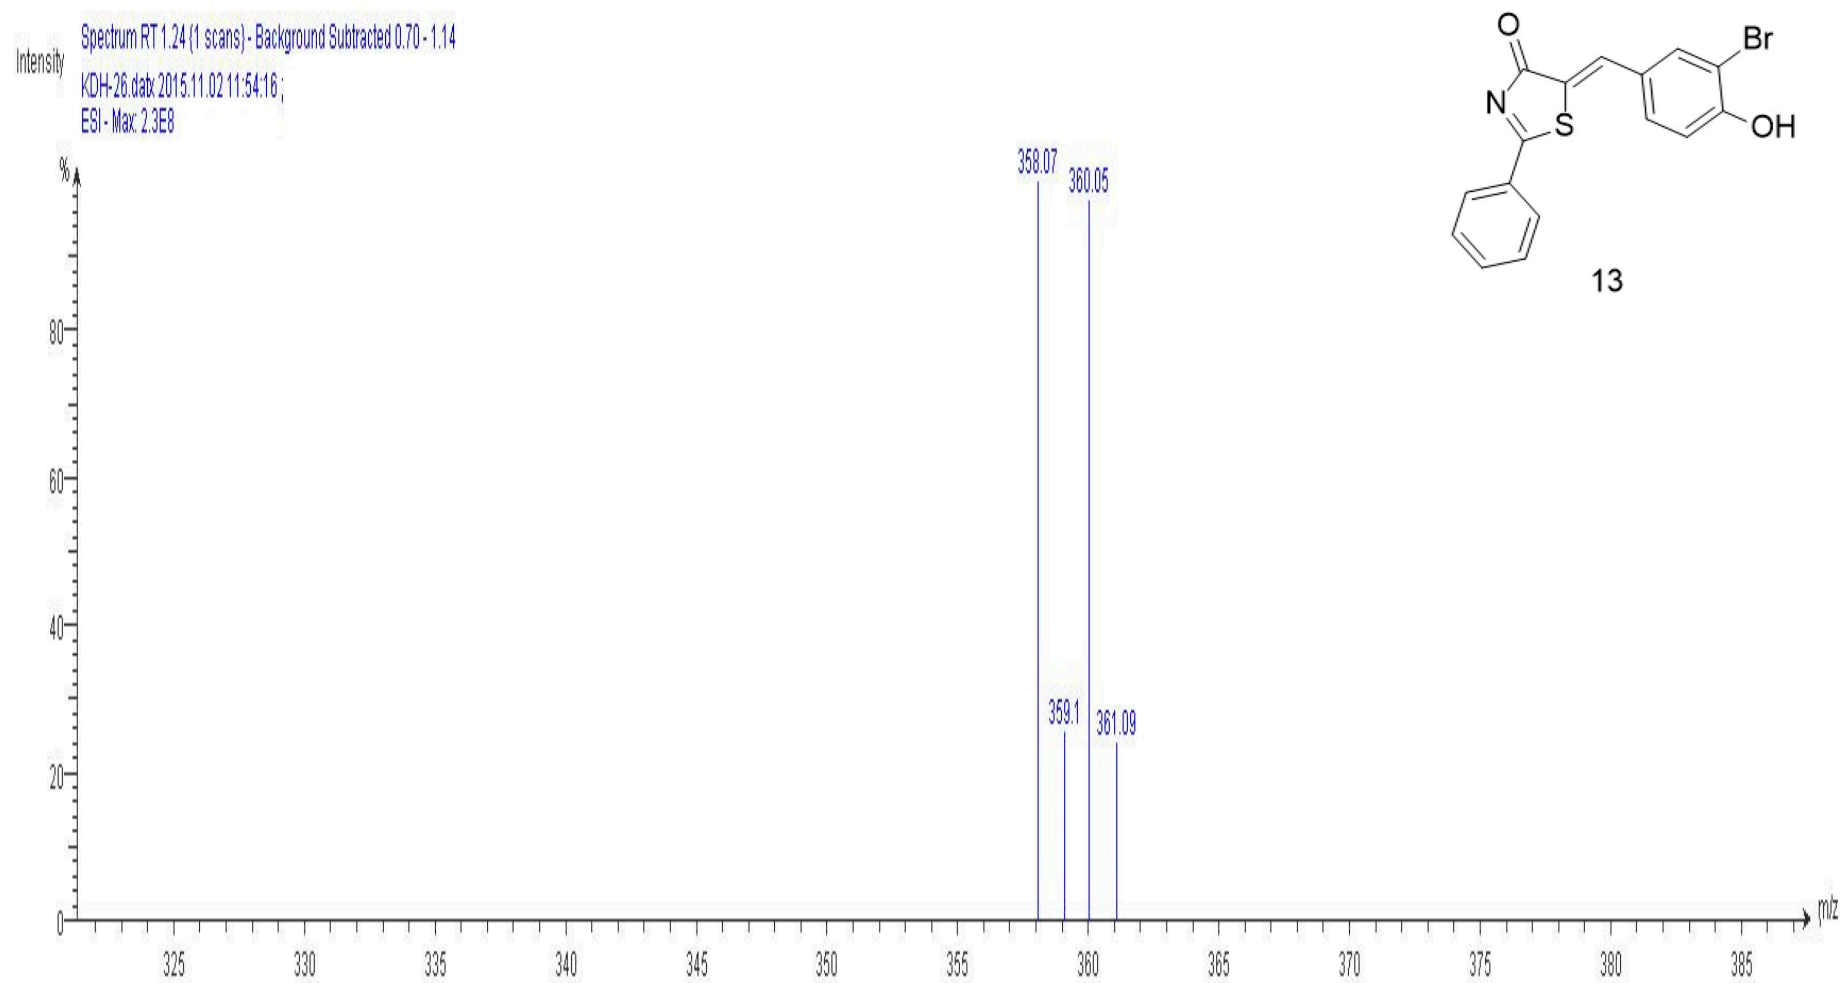

Figure S40. LRMS spectrum of compound **13**.

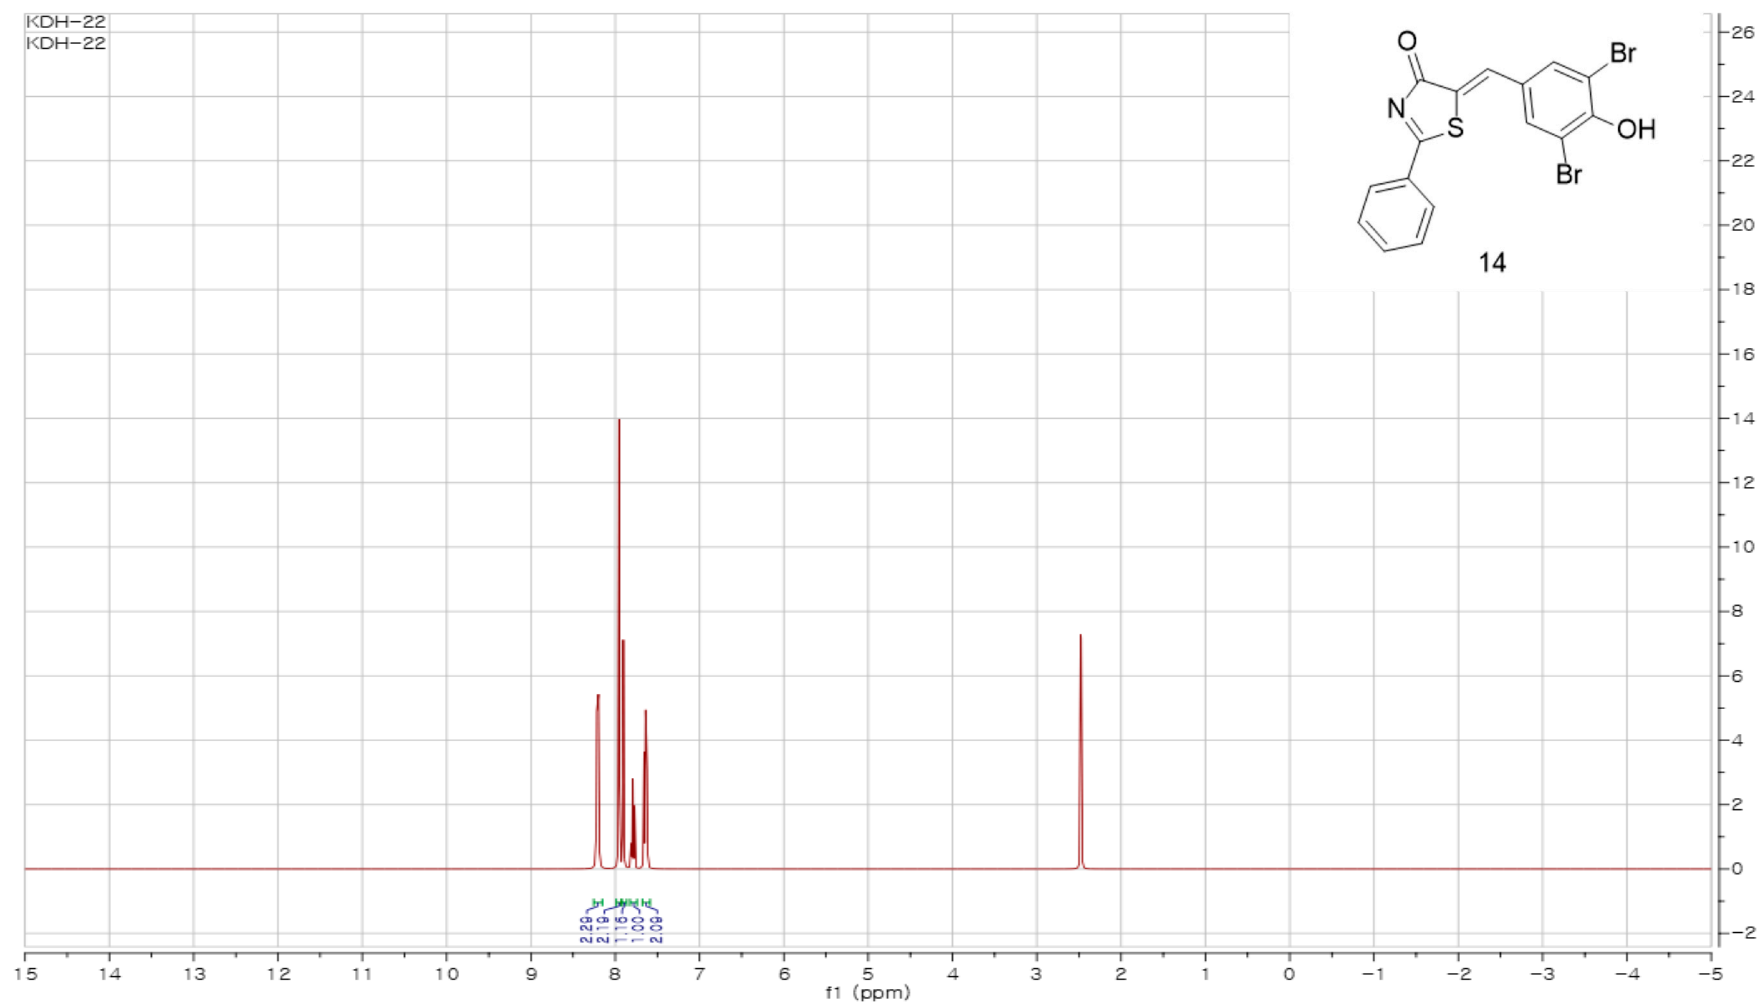

Figure S41. <sup>1</sup>H NMR spectrum of compound **14**.

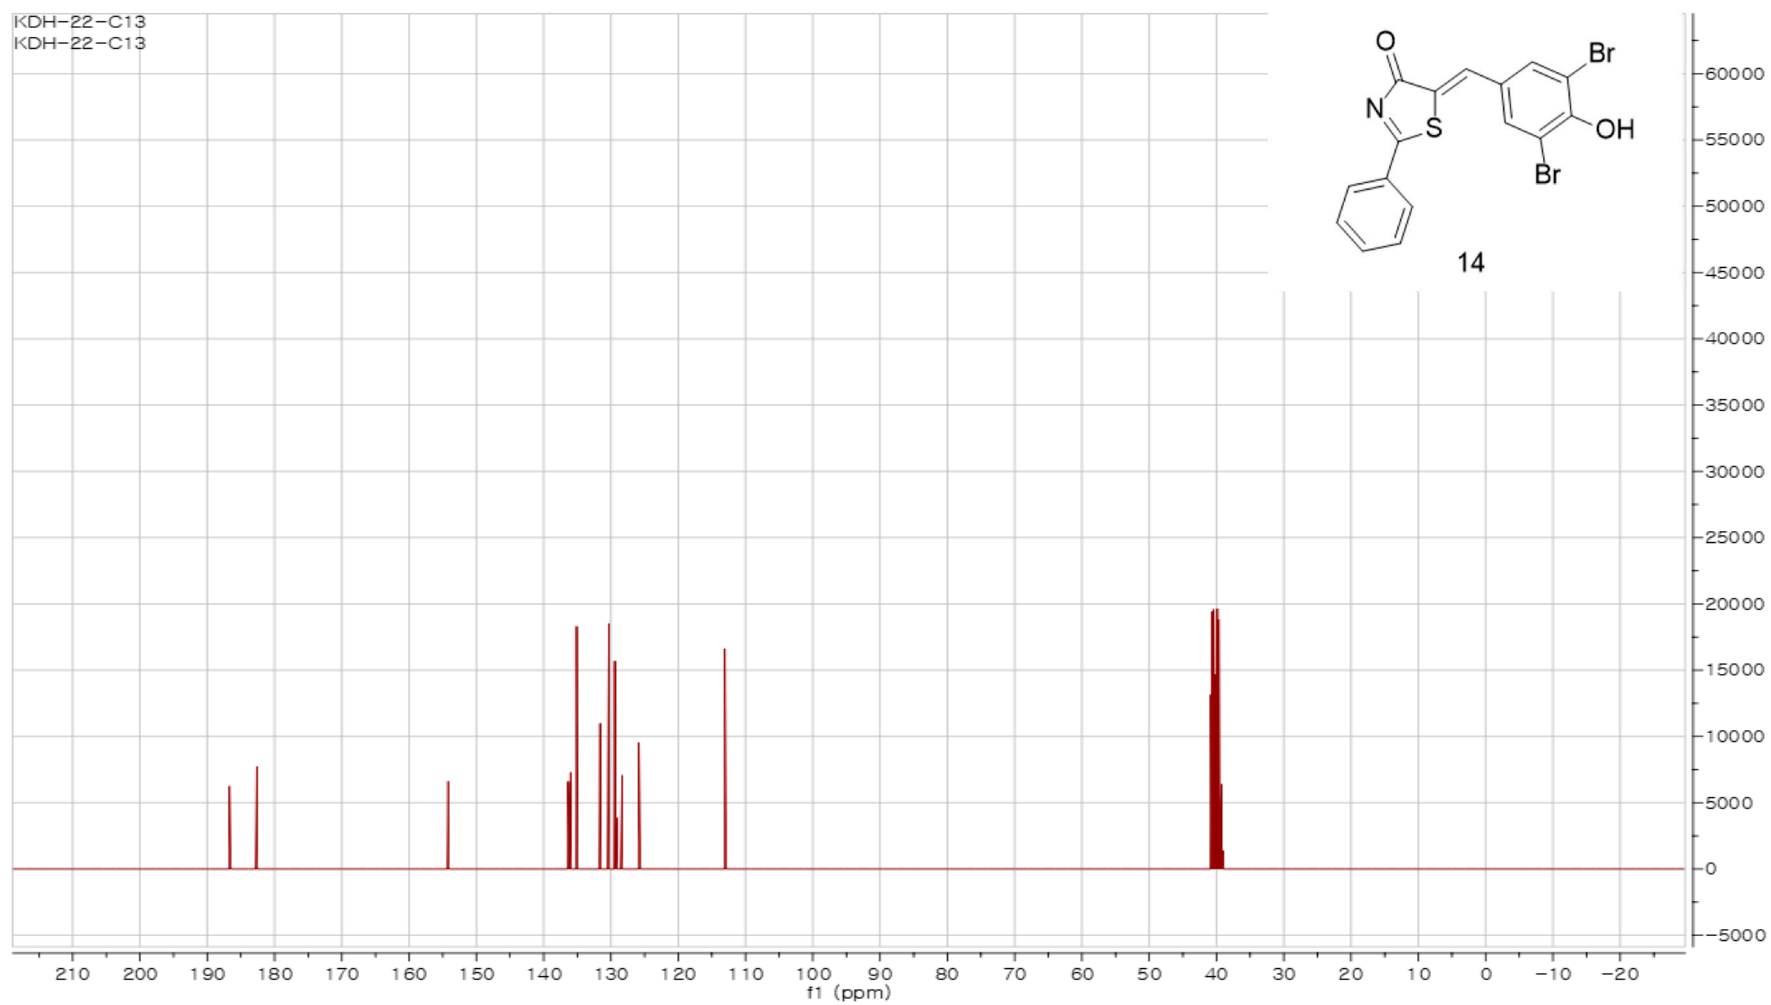

Figure S42.  $^{13}\text{C}$  NMR spectrum of compound 14.

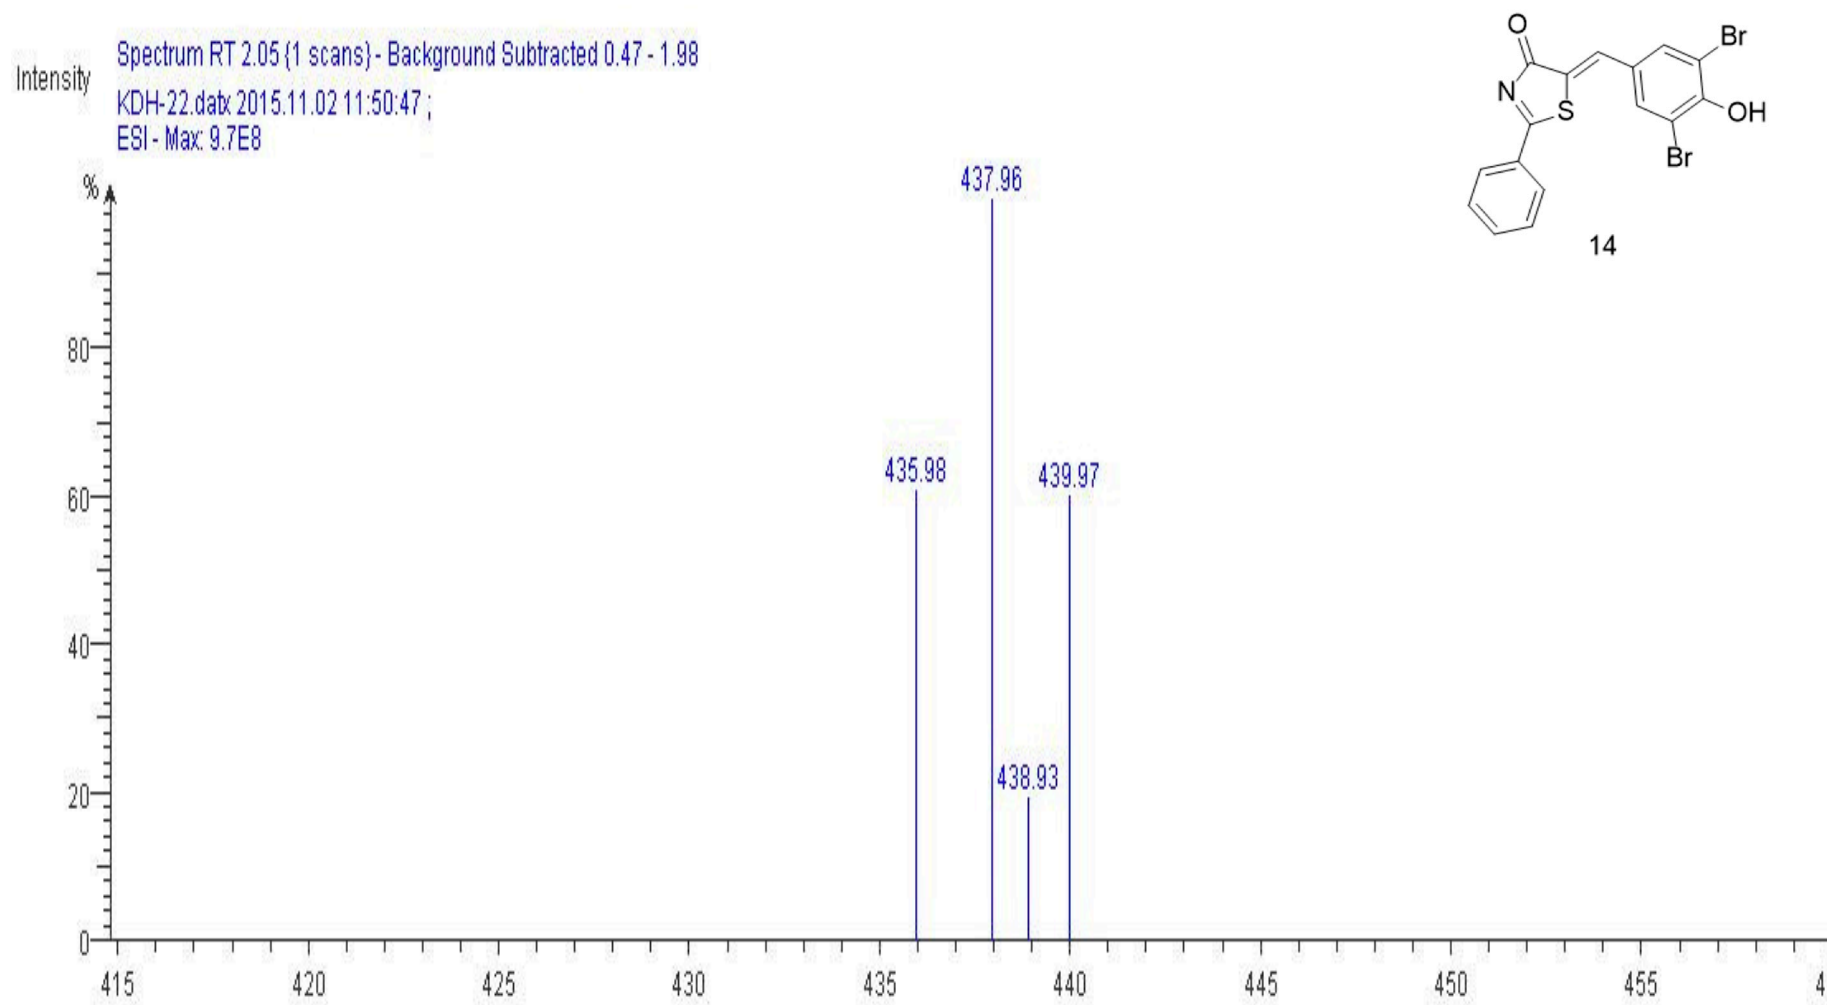

Figure S43. LRMS spectrum of compound **14**.

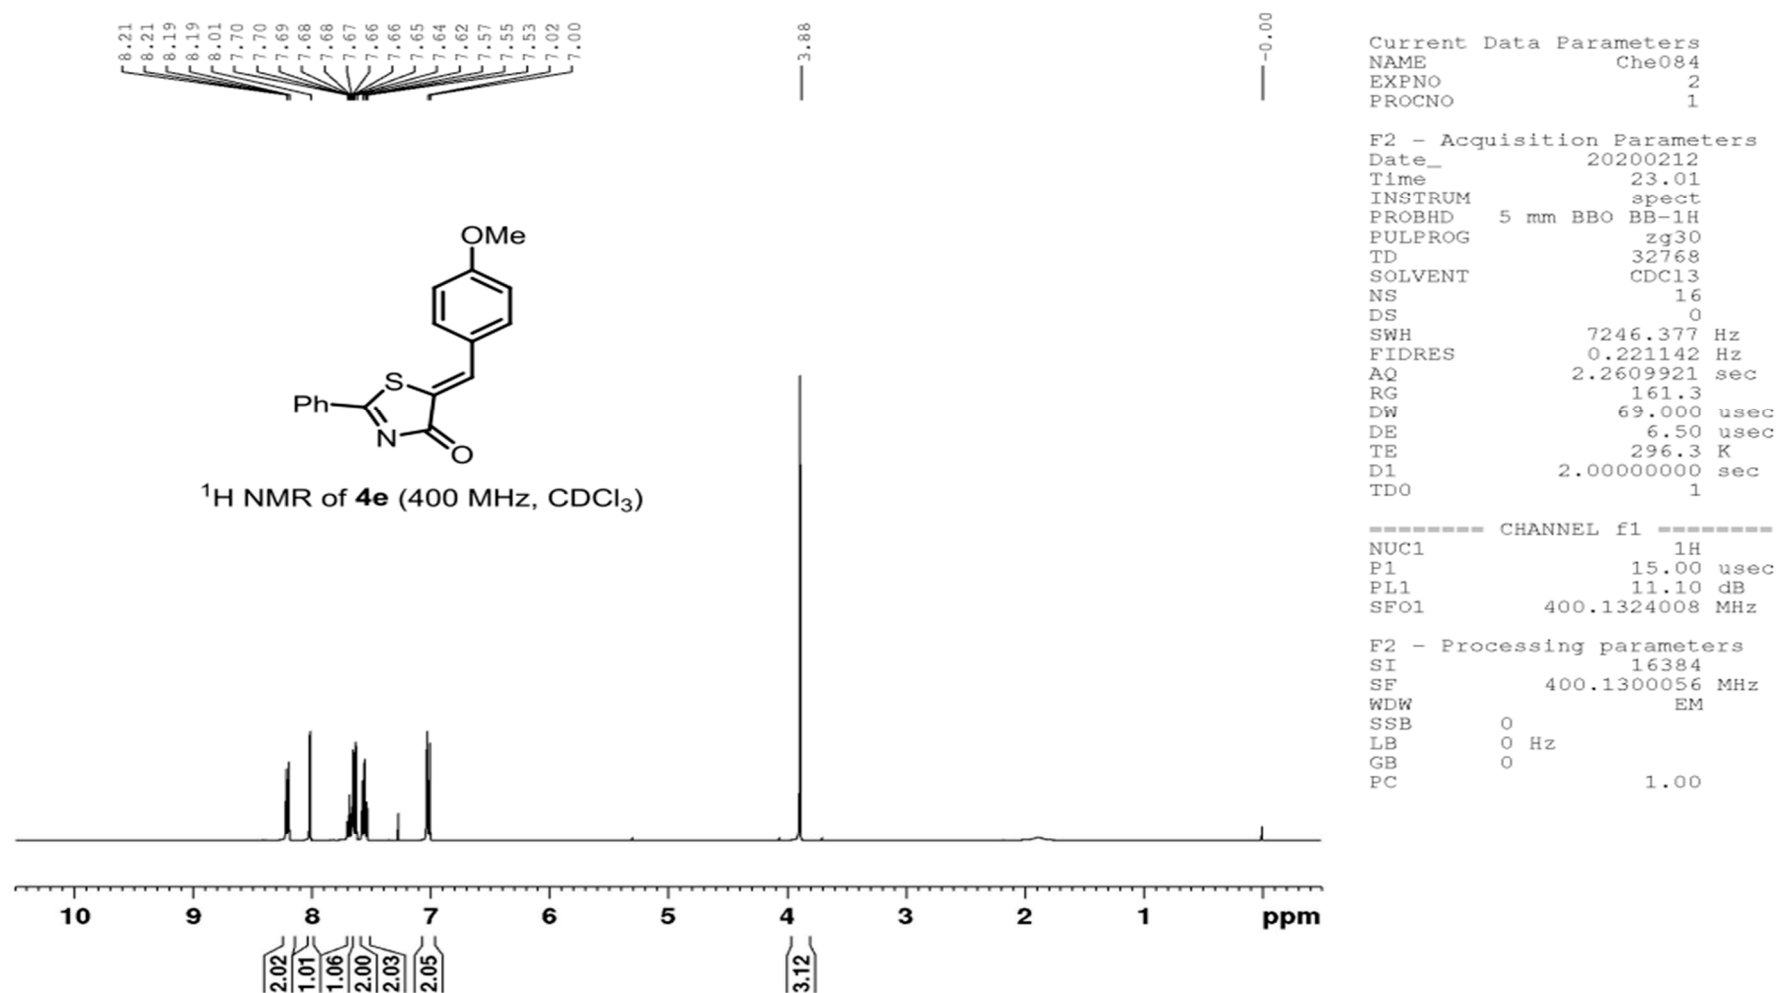

S149

Figure S44. <sup>1</sup>H NMR spectrum of compound **8** reported in other article (*Org. Lett.* 2020, 22, 17, 6868–6872).

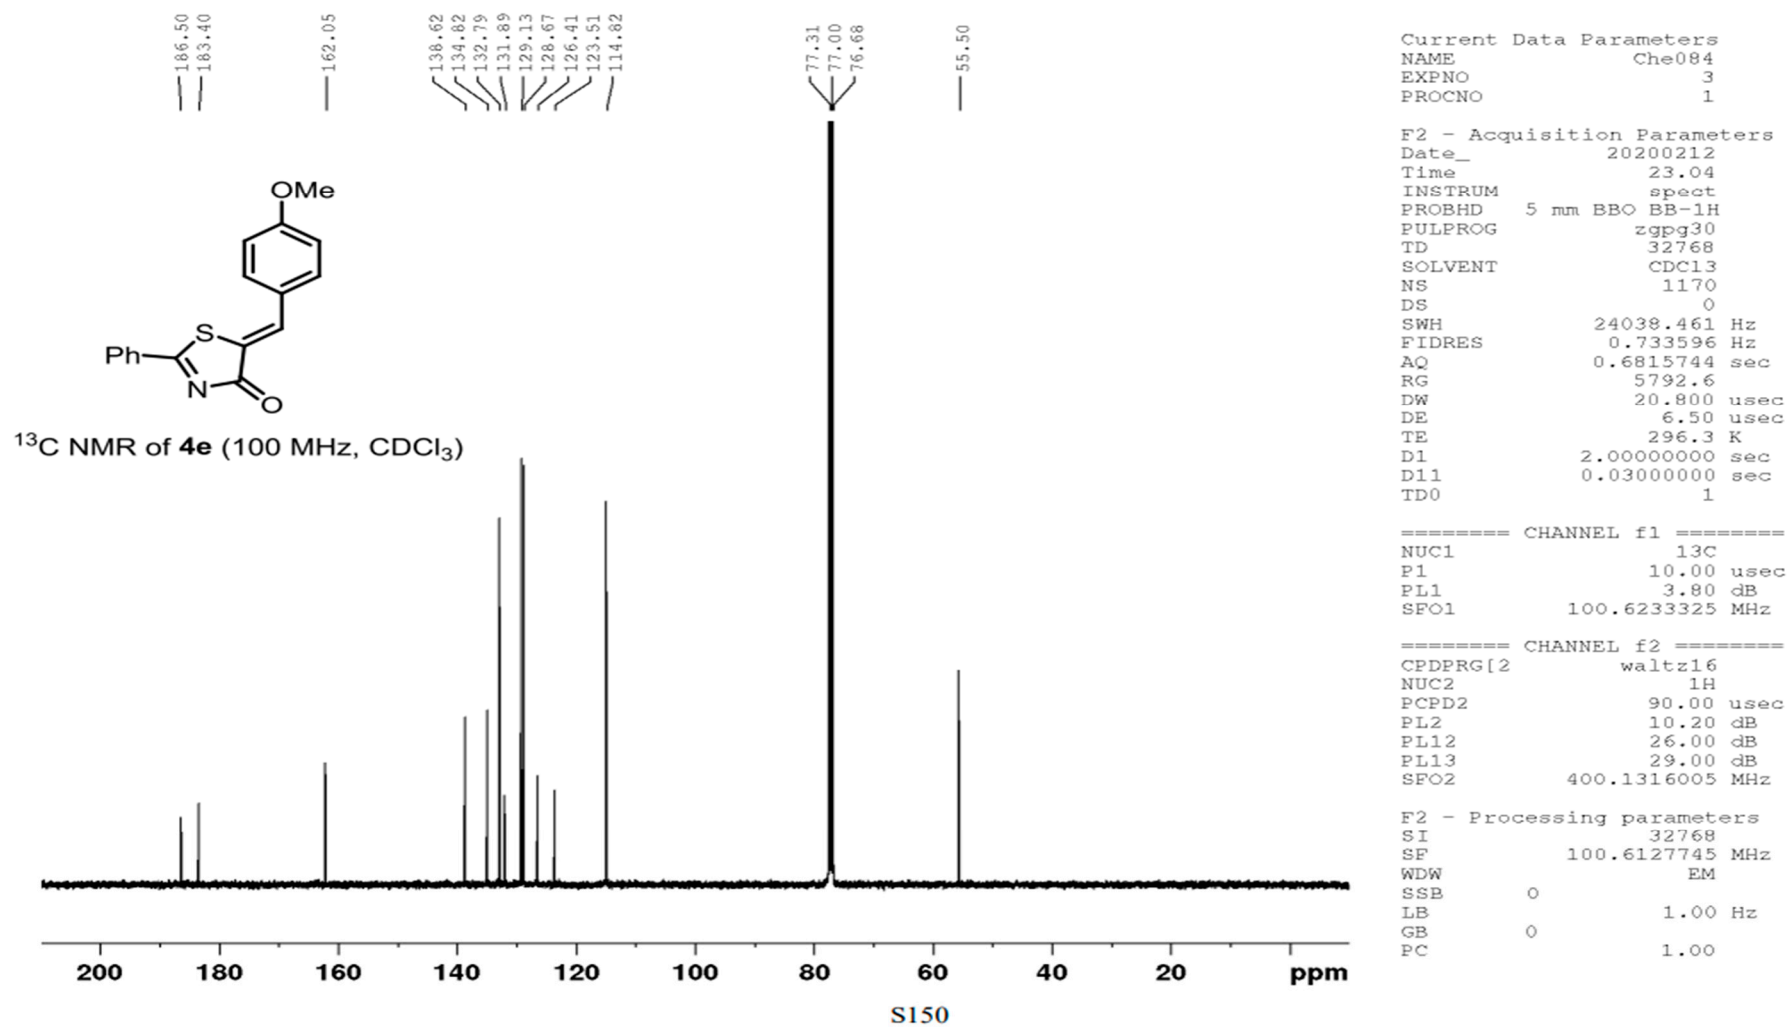

Figure S45. <sup>13</sup>C NMR spectrum of compound **8** reported in other article (*Org. Lett.* 2020, 22, 17, 6868–6872).

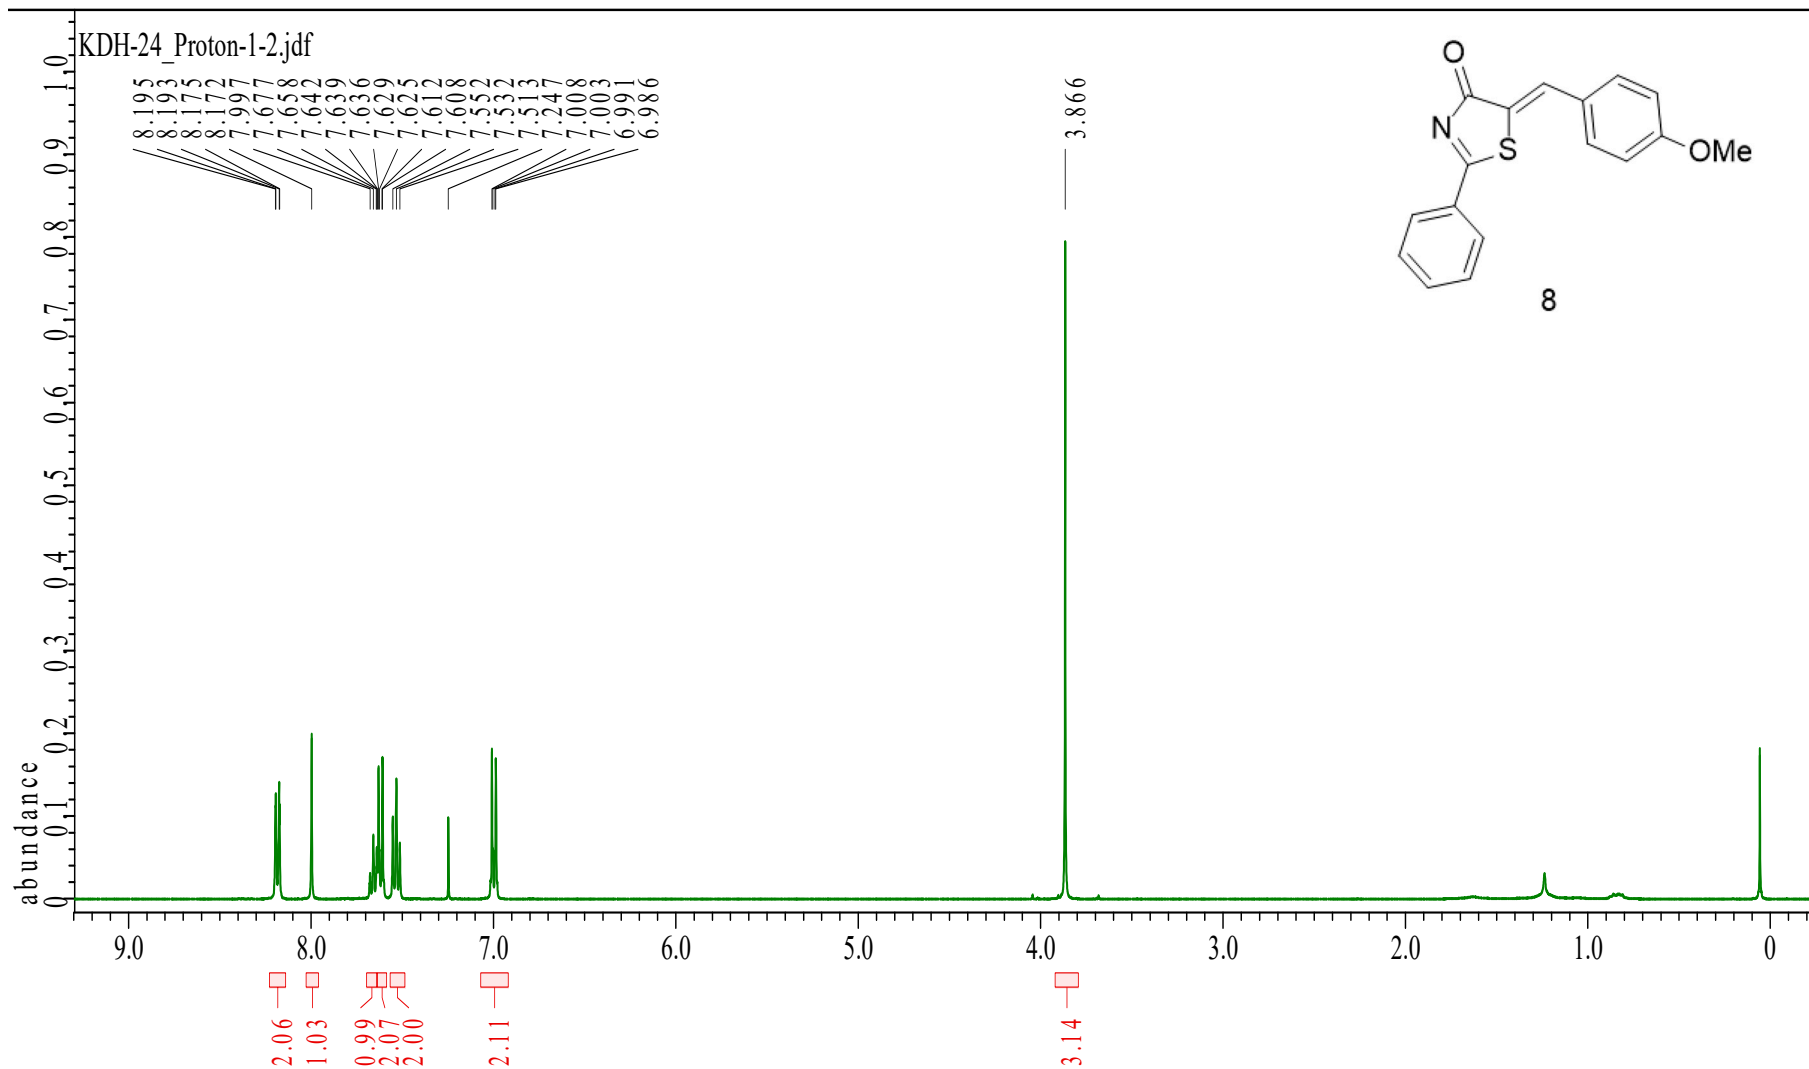

Figure S46.  $^1\text{H}$  NMR spectrum of compound **8**.

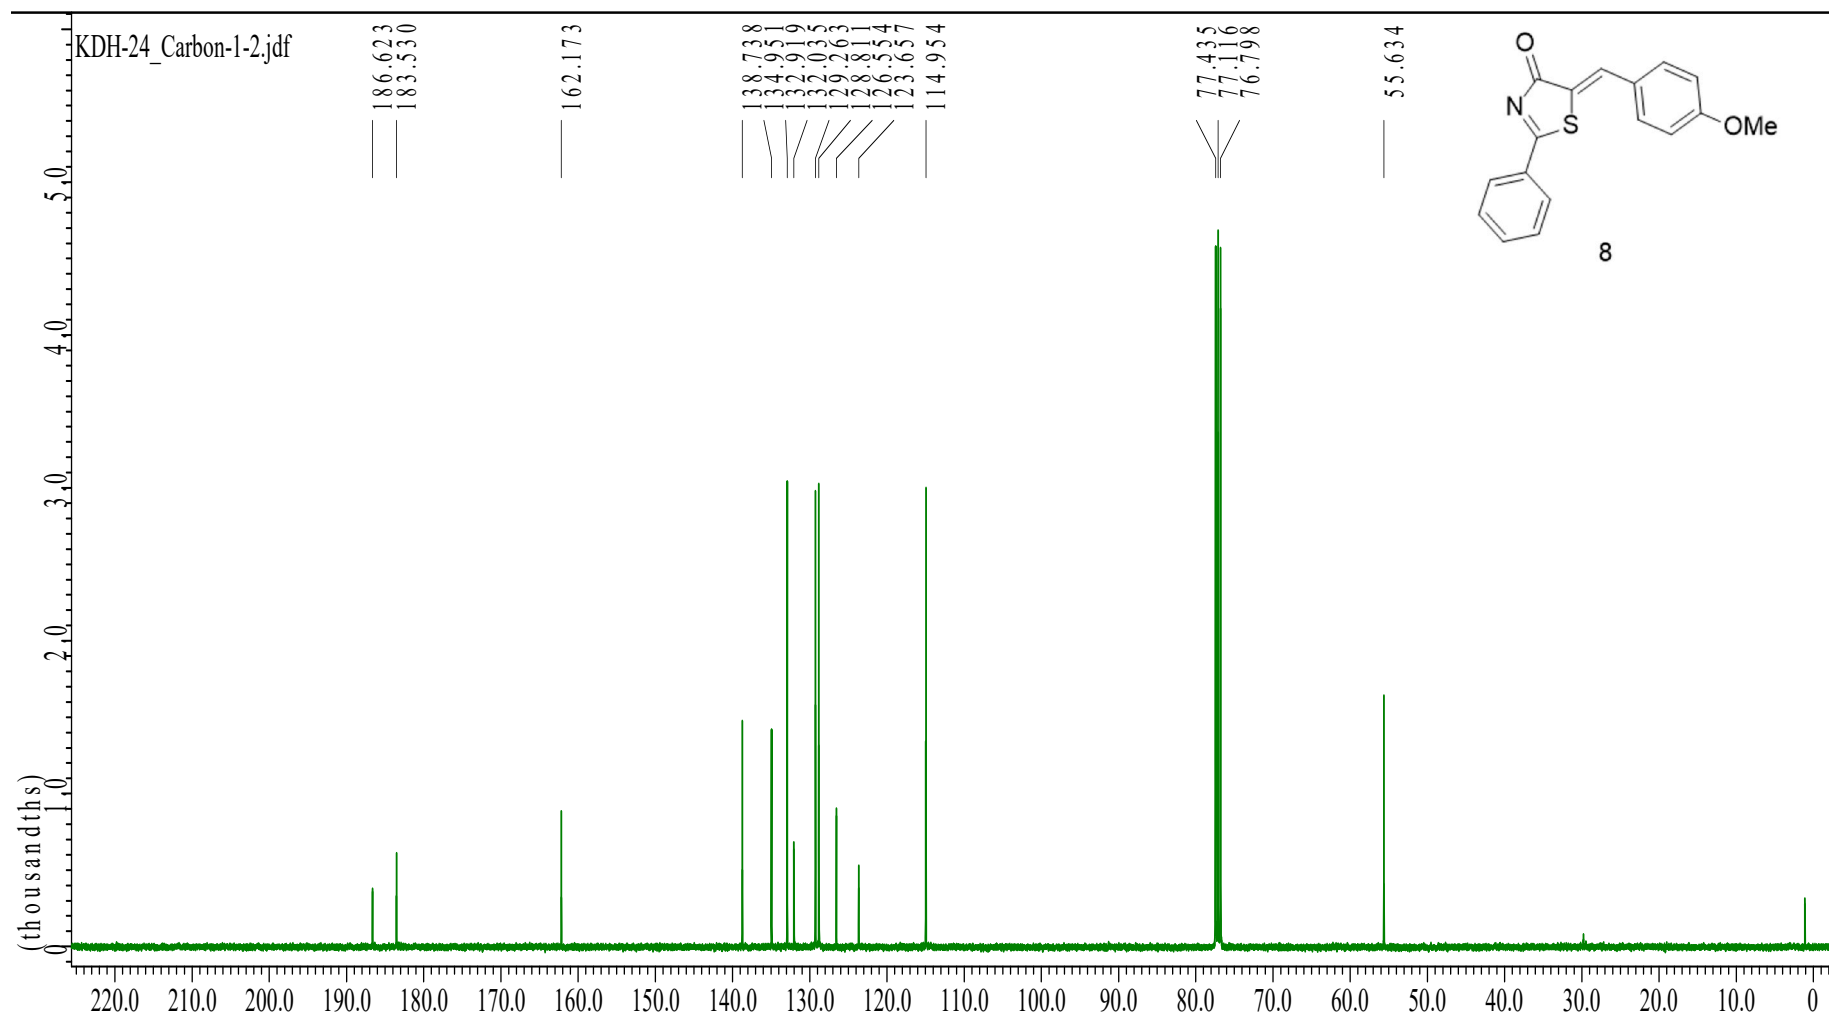

Figure S47.  $^{13}\text{C}$  NMR spectrum of compound **8**.
